# Supplementary material for: Metal-free catalytic conversion of CO2into methanol: local electrophilicity as a tunable property in the design and performance of aniline-derived aminoborane-based FLPs
Source: Royal Society of Chemistry journal article supplement (doi:10.1039/d3qi00128h), 2023-01-01
Supplement: d3qi00128h1.pdf [file d3qi00128h1.pdf]

# Metal-Free Catalytic Conversion of CO<sub>2</sub> Into Methanol: Local Electrophilicity as a Tuning Property in the Design and Performance of the Aniline-Derived Aminoborane-Based FLPs

## Electronic Supplementary Information (ESI)

César Barrales-Martínez,<sup>\*a,b</sup> Rocío Durán,<sup>b</sup> and Pablo Jaque<sup>\*a,c</sup>

<sup>a</sup> *Departamento de Química Orgánica y Fisicoquímica, Facultad de Ciencias Químicas y Farmacéuticas, Universidad de Chile, Sergio Livingstone 1007, Independencia, Santiago, Chile.*

<sup>b</sup> *Instituto de Investigación Interdisciplinaria (I<sup>2</sup>), Vicerrectoría Académica, and Centro de Bioinformática, Simulación y Modelado (CBSM), Facultad de Ingeniería, Universidad de Talca, Campus Lircay, Talca 3460000, Chile.*

<sup>c</sup> *Centro de Modelamiento Molecular, Biofísica y Bioinformática, CM2B2, Universidad de Chile, Sergio Livingstone 1007, Independencia, Santiago, Chile.*

### Table of Contents

|                                                                       |   |
|-----------------------------------------------------------------------|---|
| 1. Energetic analysis.....                                            | 2 |
| 2. Side Reactions.....                                                | 2 |
| 3. Mechanistic analysis.....                                          | 3 |
| 4. Activation Strain Model analysis of methanediol hydrogenation..... | 6 |
| 5. Analysis of catalytic activity.....                                | 7 |
| 6. Cartesian Coordinates.....                                         | 8 |

## 1. Energetic analysis

**Table S1.** Activation Gibbs free energy ( $\Delta G_{\text{act}}$ ) and Gibbs free energy change ( $\Delta G^\circ$ ) at 353 K (80°C), associated with the H<sub>2</sub> activation and all hydrogenation processes in **gas-phase**. The ZPE corrected electronic energy values are shown in parenthesis. All values are in kcal/mol.

| FLP                               | H <sub>2</sub>          |                  | CO <sub>2</sub>         |                  | HCOOH                   |                  | CH <sub>2</sub> (OH) <sub>2</sub> |                  | CH <sub>2</sub> O       |                  |
|-----------------------------------|-------------------------|------------------|-------------------------|------------------|-------------------------|------------------|-----------------------------------|------------------|-------------------------|------------------|
|                                   | $\Delta G_{\text{act}}$ | $\Delta G^\circ$ | $\Delta G_{\text{act}}$ | $\Delta G^\circ$ | $\Delta G_{\text{act}}$ | $\Delta G^\circ$ | $\Delta G_{\text{act}}$           | $\Delta G^\circ$ | $\Delta G_{\text{act}}$ | $\Delta G^\circ$ |
| <b>Mes</b>                        | 23.6 (14.1)             | 17.3 (7.4)       | 23.4 (10.3)             | -2.3 (1.2)       | 24.0 (8.1)              | -12.4 (-10.7)    | 59.0 (43.5)                       | -30.4 (-17.0)    | 16.6 (2.0)              | -30.7 (-28.8)    |
| <b>Mes'</b>                       | 23.2 (13.2)             | 16.0 (5.8)       | 20.4 (7.0)              | -1.9 (2.8)       | 20.5 (4.9)              | -11.9 (-9.2)     | 46.5 (32.0)                       | -29.9 (-15.5)    | 14.4 (-0.1)             | -30.2 (-27.3)    |
| <b>H</b>                          | 15.0 (6.0)              | 10.5 (7.4)       | 18.8 (6.0)              | 4.4 (6.8)        | 18.6 (3.2)              | -12.4 (-5.2)     | 59.5 (44.9)                       | -23.7 (-11.5)    | 10.5 (-3.8)             | -23.9 (-23.3)    |
| <b>FMes</b>                       | 28.6 (19.4)             | 8.3 (-1.6)       | 38.8 (26.1)             | 6.6 (10.2)       | 37.0 (21.0)             | -3.5 (-1.7)      | 54.8 (39.6)                       | -21.5 (-8.1)     | 21.2 (6.0)              | -21.7 (-19.8)    |
| <b>CF<sub>3</sub></b>             | 13.3 (4.7)              | -12.4 (-21.7)    | 41.4 (28.2)             | 27.4 (30.3)      | 32.2 (16.5)             | 17.3 (18.3)      | 43.3 (28.3)                       | -0.7 (12.0)      | 19.0 (4.5)              | -1.0 (0.2)       |
| <b>PFtb</b>                       | 19.1 (10.4)             | -23.8 (-32.7)    | 58.5 (44.7)             | 38.8 (41.3)      | 51.5 (37.2)             | 28.7 (29.3)      | 63.1 (47.6)                       | 10.7 (23.0)      | 30.9 (15.7)             | 10.4 (11.2)      |
| <b>C<sub>6</sub>F<sub>5</sub></b> | 19.9 (11.1)             | 2.3 (-6.7)       | 32.2 (18.6)             | 12.7 (15.3)      | 25.5 (9.5)              | 2.6 (3.3)        | 50.0 (35.1)                       | -15.4 (-3.0)     | 16.4 (1.3)              | -15.7 (-14.8)    |

**Table S2.** Activation Gibbs free energy ( $\Delta G_{\text{act}}$ ) and Gibbs free energy change ( $\Delta G^\circ$ ) at 353 K (80°C), associated with the H<sub>2</sub> activation and all hydrogenation processes in **benzene**. The ZPE corrected electronic energy values are shown in parenthesis. All values are in kcal/mol.

| FLP                               | H <sub>2</sub>          |                  | CO <sub>2</sub>         |                  | HCOOH                   |                  | CH <sub>2</sub> (OH) <sub>2</sub> |                  | CH <sub>2</sub> O       |                  |
|-----------------------------------|-------------------------|------------------|-------------------------|------------------|-------------------------|------------------|-----------------------------------|------------------|-------------------------|------------------|
|                                   | $\Delta G_{\text{act}}$ | $\Delta G^\circ$ | $\Delta G_{\text{act}}$ | $\Delta G^\circ$ | $\Delta G_{\text{act}}$ | $\Delta G^\circ$ | $\Delta G_{\text{act}}$           | $\Delta G^\circ$ | $\Delta G_{\text{act}}$ | $\Delta G^\circ$ |
| <b>Mes</b>                        | 23.2 (13.7)             | 13.1 (3.2)       | 22.9 (9.8)              | -2.2 (1.4)       | 27.6 (11.7)             | -9.0 (-7.3)      | 63.1 (47.7)                       | -28.0 (-14.7)    | 19.3 (4.6)              | -24.7 (-25.4)    |
| <b>Mes'</b>                       | 22.2 (12.2)             | 12.3 (2.1)       | 20.3 (6.9)              | -1.3 (2.5)       | 23.4 (7.8)              | -8.2 (-6.2)      | 51.0 (36.4)                       | -27.2 (-13.6)    | 16.4 (1.9)              | -23.0 (-24.3)    |
| <b>H</b>                          | 13.6 (4.7)              | 4.3 (-4.4)       | 19.9 (7.1)              | 6.6 (9.0)        | 23.3 (7.9)              | -0.2 (0.3)       | 61.7 (47.0)                       | -19.2 (-7.0)     | 14.2 (-0.1)             | -21.5 (-17.8)    |
| <b>FMes</b>                       | 28.4 (19.2)             | 3.7 (-6.3)       | 39.7 (27.0)             | 7.2 (10.9)       | 44.8 (28.8)             | 0.4 (2.1)        | 59.5 (44.3)                       | -18.6 (-5.2)     | 24.8 (9.5)              | -14.2 (-15.9)    |
| <b>CF<sub>3</sub></b>             | 13.4 (4.7)              | -18.2 (-27.5)    | 44.8 (31.6)             | 29.1 (32.1)      | 37.9 (22.2)             | 22.3 (23.4)      | 49.7 (34.8)                       | -3.3 (16.1)      | 23.0 (8.5)              | 5.9 (5.3)        |
| <b>PFtb</b>                       | 18.8 (10.1)             | -30.1 (-39.1)    | 61.9 (48.1)             | 41.0 (43.6)      | 58.1 (42.1)             | 34.2 (34.9)      | 67.8 (52.4)                       | 15.2 (27.6)      | 36.0 (20.7)             | 17.4 (16.9)      |
| <b>C<sub>6</sub>F<sub>5</sub></b> | 19.7 (11.0)             | -2.4 (-11.3)     | 32.7 (19.1)             | 13.3 (15.9)      | 29.6 (13.6)             | 6.5 (7.2)        | 54.9 (39.9)                       | -12.5 (-0.2)     | 19.0 (3.9)              | -11.8 (-10.9)    |

## 2. Side reactions

**Table S3.** Activation Gibbs free energy ( $\Delta G_{\text{act}}$ ) and Gibbs free energy change ( $\Delta G^\circ$ ) at 353 K (80°C), associated with the protodeborylation of the FLPs in gas-phase and benzene. Enthalpies are shown in parenthesis. All values are in kcal/mol.

| FLP         | $\Delta G_{\text{act}}$ ( $\Delta H_{\text{act}}$ ) | $\Delta G^\circ$ ( $\Delta H^\circ$ ) |
|-------------|-----------------------------------------------------|---------------------------------------|
| Gas-phase   |                                                     |                                       |
| <b>Mes</b>  | 14.0 (14.3)                                         | -25.4 (-3.4)                          |
| <b>Mes'</b> | 10.3 (10.3)                                         | -23.6 (-3.9)                          |
| <b>C6F5</b> | 20.3 (20.1)                                         | -9.0 (8.1)                            |
| Benzene     |                                                     |                                       |
| <b>Mes</b>  | 16.4 (16.7)                                         | -25.3 (-3.3)                          |
| <b>Mes'</b> | 12.6 (12.7)                                         | -23.0 (-3.3)                          |
| <b>C6F5</b> | 23.6 (23.4)                                         | -7.6 (9.5)                            |

**Table S4.** Gibbs free energy change ( $\Delta G^\circ$ ) at 353 K (80°C), associated with the dimerisation of the FLPs after the first protodeborylation into an 8-membered ring boat-type structure and into a diborane-type structure in gas phase and benzene. Enthalpies are shown in parenthesis. All values are in kcal/mol.

| FLP         | 8-member ring dimer | Diborane dimer |
|-------------|---------------------|----------------|
| Gas-phase   |                     |                |
| <b>Mes</b>  | 36.4 (9.1)          | -0.2 (-24.3)   |
| <b>Mes'</b> | 22.1 (-2.4)         | -0.1 (-20.2)   |
| <b>C6F5</b> | 7.6 (-17.9)         | -6.8 (-28.4)   |
| Benzene     |                     |                |
| <b>Mes</b>  | 39.1 (11.9)         | 5.0 (-19.2)    |
| <b>Mes'</b> | 24.4 (-0.1)         | 4.2 (-15.9)    |

|             |              |             |
|-------------|--------------|-------------|
| <b>C6F5</b> | 14.2 (-10.4) | 0.4 (-20.3) |
|-------------|--------------|-------------|

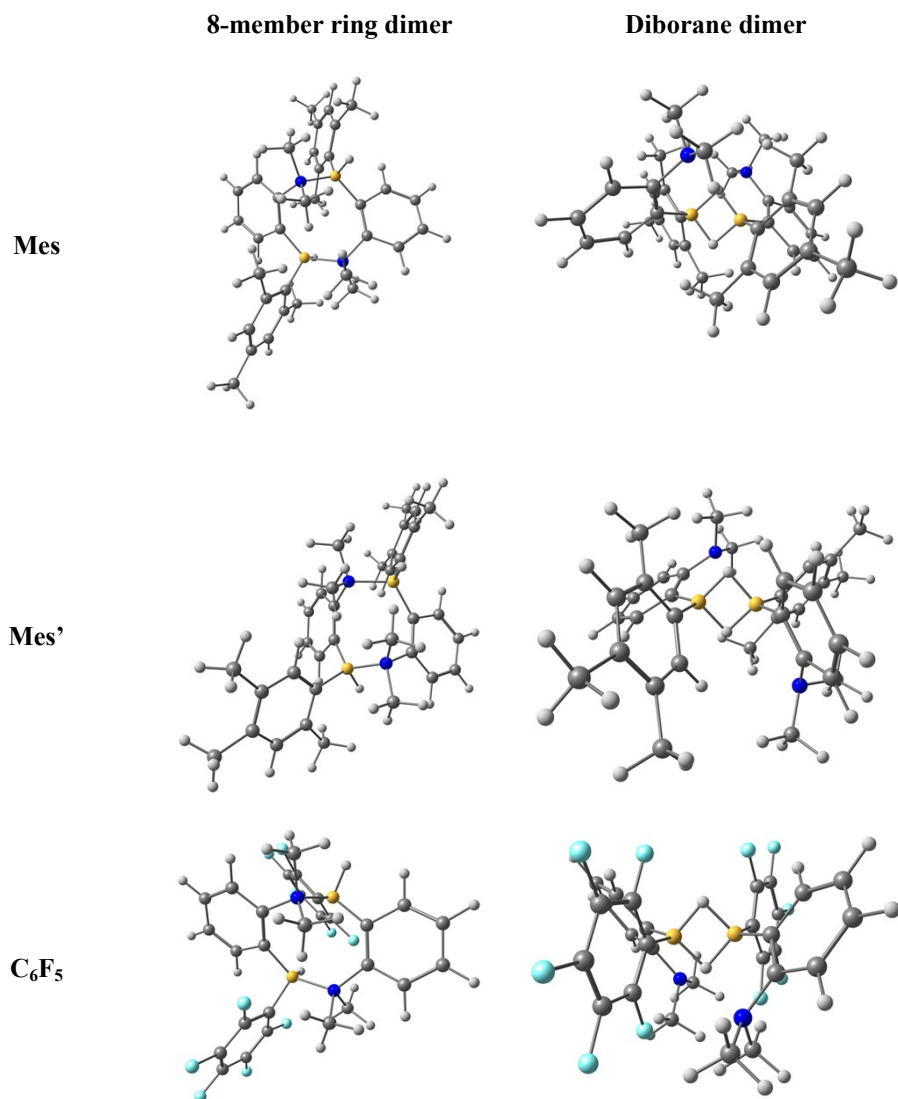

**Figure S1.** Structures of the 8-member ring and diborane dimers with **Mes**, **Mes'** and **C<sub>6</sub>F<sub>5</sub>**.

### 3. Mechanistic analysis

**Table S5.** Activation energy ( $\Delta E_{\text{act}}$ ), total distortion energy ( $\Delta E_{\text{dist}}$ ) and the components associated with each reactant and interaction energy ( $\Delta E_{\text{int}}$ ) of the **CO<sub>2</sub>** and **HCOOH** hydrogenation processes. All values are in kcal/mol.

| FLP                               | CO <sub>2</sub>         |                                 |                                             |                          |                         | HCOOH                   |                                 |                                   |                          |                         |
|-----------------------------------|-------------------------|---------------------------------|---------------------------------------------|--------------------------|-------------------------|-------------------------|---------------------------------|-----------------------------------|--------------------------|-------------------------|
|                                   | $\Delta E_{\text{act}}$ | $\Delta E_{\text{dist}}$<br>FLP | $\Delta E_{\text{dist}}$<br>CO <sub>2</sub> | $\Delta E_{\text{dist}}$ | $\Delta E_{\text{int}}$ | $\Delta E_{\text{act}}$ | $\Delta E_{\text{dist}}$<br>FLP | $\Delta E_{\text{dist}}$<br>HCOOH | $\Delta E_{\text{dist}}$ | $\Delta E_{\text{int}}$ |
| <b>Mes</b>                        | 9.7                     | 16.6<br>(33%)                   | 33.2<br>(67%)                               | 49.8                     | -40.1                   | 12.5                    | 24.2 (60%)                      | 16.4<br>(40%)                     | 40.6                     | -28.0                   |
| <b>Mes'</b>                       | 7.2                     | 18.5<br>(32%)                   | 38.8<br>(68%)                               | 57.3                     | -50.1                   | 9.0                     | 20.2 (57%)                      | 15.2<br>(43%)                     | 35.4                     | -26.4                   |
| <b>H</b>                          | 6.4                     | 9.3 (25%)                       | 27.7<br>(75%)                               | 37.0                     | -30.6                   | 8.0                     | 16.8 (48%)                      | 18.0<br>(52%)                     | 34.8                     | -26.9                   |
| <b>FMes</b>                       | 29.8                    | 49.2<br>(51%)                   | 47.2<br>(49%)                               | 96.4                     | -66.6                   | 31.9                    | 46.3 (67%)                      | 23.0<br>(33%)                     | 69.2                     | -37.4                   |
| <b>CF<sub>3</sub></b>             | 33.7                    | 60.6<br>(55%)                   | 50.1<br>(45%)                               | 110.<br>7                | -77.0                   | 24.1                    | 47.4 (69%)                      | 21.4<br>(31%)                     | 68.8                     | -44.8                   |
| <b>PFtb</b>                       | 49.8                    | 84.6<br>(60%)                   | 56.8<br>(40%)                               | 141.<br>3                | -91.9                   | 42.3                    | 115.7 (72%)                     | 45.1<br>(28%)                     | 160.<br>8                | -118.6                  |
| <b>C<sub>6</sub>F<sub>5</sub></b> | 21.0                    | 37.7<br>(45%)                   | 45.4<br>(55%)                               | 83.1                     | -62.1                   | 15.8                    | 31.5 (62%)                      | 19.5<br>(38%)                     | 51.0                     | -35.2                   |

**Table S6.** Activation energy ( $\Delta E_{\text{act}}$ ), total distortion energy ( $\Delta E_{\text{dist}}$ ) and the components associated with each reactant and interaction energy ( $\Delta E_{\text{int}}$ ) of the methanediol and formaldehyde hydrogenation processes. All values are in kcal/mol.

| FLP                           | $\text{CH}_2(\text{OH})_2$ |                                 |                                             |                          |                         | $\text{CH}_2\text{O}$   |                                 |                                   |                          |                         |
|-------------------------------|----------------------------|---------------------------------|---------------------------------------------|--------------------------|-------------------------|-------------------------|---------------------------------|-----------------------------------|--------------------------|-------------------------|
|                               | $\Delta E_{\text{act}}$    | $\Delta E_{\text{dist}}$<br>FLP | $\Delta E_{\text{dist}}$<br>CO <sub>2</sub> | $\Delta E_{\text{dist}}$ | $\Delta E_{\text{int}}$ | $\Delta E_{\text{act}}$ | $\Delta E_{\text{dist}}$<br>FLP | $\Delta E_{\text{dist}}$<br>HCOOH | $\Delta E_{\text{dist}}$ | $\Delta E_{\text{int}}$ |
| Mes                           | 49.3                       | 94.0 (52%)                      | 88.2 (48%)                                  | 182.2                    | -132.9                  | 3.4                     | 15.1 (70%)                      | 6.5 (30%)                         | 21.6                     | -18.2                   |
| Mes'                          | 39.5                       | 100.6 (50%)                     | 100.4 (50%)                                 | 201.0                    | -161.5                  | 0.8                     | 12.5 (67%)                      | 6.0 (33%)                         | 18.5                     | -17.7                   |
| H                             | 49.3                       | 73.5 (49%)                      | 75.1 (51%)                                  | 148.7                    | -100.5                  | -2.3                    | 8.5 (59%)                       | 5.8 (41%)                         | 14.2                     | -16.5                   |
| FMes                          | 46.8                       | 89.4 (46%)                      | 107.0 (54%)                                 | 196.4                    | -149.6                  | 9.8                     | 23.4 (68%)                      | 10.8 (32%)                        | 34.2                     | -24.4                   |
| CF <sub>3</sub>               | 37.5                       | 97.6 (48%)                      | 105.9 (52%)                                 | 203.5                    | -166.0                  | 9.4                     | 18.9 (61%)                      | 12.2 (39%)                        | 31.1                     | -21.8                   |
| PFtb                          | 54.6                       | 104.8 (50%)                     | 104.6 (50%)                                 | 209.5                    | -154.8                  | 21.5                    | 49.4 (79%)                      | 13.1 (21%)                        | 62.5                     | -41.0                   |
| C <sub>6</sub> F <sub>5</sub> | 42.7                       | 98.0 (49%)                      | 103.0 (51%)                                 | 200.9                    | -158.2                  | 2.9                     | 14.3 (65%)                      | 7.6 (35%)                         | 21.9                     | -18.9                   |

**Table S7.** Internuclear distances B-H and N-H at TS for each hydrogenation. All values are in Å.

| FLP                           | CO <sub>2</sub>  |                  | HCOOH            |                  | $\text{CH}_2(\text{OH})_2$ |                  | $\text{CH}_2\text{O}$ |                  |
|-------------------------------|------------------|------------------|------------------|------------------|----------------------------|------------------|-----------------------|------------------|
|                               | $d_{\text{B-H}}$ | $d_{\text{N-H}}$ | $d_{\text{B-H}}$ | $d_{\text{N-H}}$ | $d_{\text{B-H}}$           | $d_{\text{N-H}}$ | $d_{\text{B-H}}$      | $d_{\text{N-H}}$ |
| Mes                           | 1.423            | 1.056            | 1.349            | 1.137            | 1.247                      | 1.749            | 1.320                 | 1.056            |
| Mes'                          | 1.448            | 1.074            | 1.311            | 1.128            | 1.234                      | 1.810            | 1.301                 | 1.049            |
| H                             | 1.330            | 1.067            | 1.314            | 1.155            | 1.236                      | 1.640            | 1.281                 | 1.062            |
| FMes                          | 1.557            | 1.262            | 1.399            | 1.328            | 1.243                      | 1.763            | 1.328                 | 1.185            |
| CF <sub>3</sub>               | 1.506            | 1.423            | 1.309            | 1.405            | 1.221                      | 1.815            | 1.309                 | 1.173            |
| PFtb                          | 1.775            | 1.421            | 1.835            | 1.653            | 1.228                      | 1.774            | 1.336                 | 1.344            |
| C <sub>6</sub> F <sub>5</sub> | 1.531            | 1.202            | 1.326            | 1.272            | 1.238                      | 1.800            | 1.280                 | 1.099            |

**Table S8.** Variation of the internuclear distances B-H and N-H ( $\Delta d = d_{\text{TS}} - d_{\text{R}}$ ). All values are in Å.

| FLP                           | CO <sub>2</sub>         |                         | HCOOH                   |                         | $\text{CH}_2(\text{OH})_2$ |                         | $\text{CH}_2\text{O}$   |                         |
|-------------------------------|-------------------------|-------------------------|-------------------------|-------------------------|----------------------------|-------------------------|-------------------------|-------------------------|
|                               | $\Delta d_{\text{B-H}}$ | $\Delta d_{\text{N-H}}$ | $\Delta d_{\text{B-H}}$ | $\Delta d_{\text{N-H}}$ | $\Delta d_{\text{B-H}}$    | $\Delta d_{\text{N-H}}$ | $\Delta d_{\text{B-H}}$ | $\Delta d_{\text{N-H}}$ |
| Mes                           | <b>0.074</b>            | -0.002                  | 0.059                   | <b>0.086</b>            | -0.019                     | <b>0.571</b>            | <b>0.025</b>            | -0.007                  |
| Mes'                          | <b>0.203</b>            | 0.037                   | 0.066                   | <b>0.090</b>            | -0.012                     | <b>0.773</b>            | <b>0.055</b>            | 0.011                   |
| H                             | <b>0.187</b>            | 0.019                   | <b>0.113</b>            | 0.100                   | 0.011                      | <b>0.712</b>            | <b>0.084</b>            | 0.018                   |
| FMes                          | <b>0.347</b>            | 0.230                   | 0.189                   | <b>0.296</b>            | 0.033                      | <b>0.731</b>            | 0.118                   | <b>0.153</b>            |
| CF <sub>3</sub>               | 0.285                   | <b>0.391</b>            | 0.087                   | <b>0.373</b>            | -0.001                     | <b>0.783</b>            | 0.087                   | <b>0.141</b>            |
| PFtb                          | <b>0.563</b>            | 0.388                   | <b>0.725</b>            | 0.704                   | 0.015                      | <b>0.741</b>            | 0.124                   | <b>0.311</b>            |
| C <sub>6</sub> F <sub>5</sub> | <b>0.303</b>            | 0.161                   | 0.098                   | <b>0.231</b>            | 0.010                      | <b>0.758</b>            | 0.052                   | <b>0.058</b>            |

**Table S9.** Internuclear distances of B-H and N-H of catalyst, C-O of methanediol, and O-H and C-H of methanediol-catalyst at TS structure of methanediol hydrogenation. All values are in Å.

| FLP                           | B-H   | N-H   | C-O   | O-H   | C-H   |
|-------------------------------|-------|-------|-------|-------|-------|
| Mes                           | 1.234 | 1.810 | 2.611 | 0.991 | 2.257 |
| Mes'                          | 1.247 | 1.749 | 2.417 | 0.999 | 2.092 |
| H                             | 1.236 | 1.640 | 2.258 | 1.024 | 2.259 |
| FMes                          | 1.243 | 1.763 | 2.570 | 0.997 | 2.333 |
| CF <sub>3</sub>               | 1.221 | 1.815 | 2.616 | 0.992 | 2.226 |
| PFtb                          | 1.228 | 1.774 | 2.603 | 0.994 | 2.204 |
| C <sub>6</sub> F <sub>5</sub> | 1.238 | 1.800 | 2.615 | 0.994 | 2.132 |

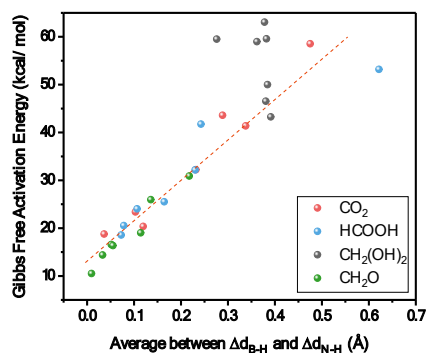

**Figure S2.** Relation between activation energy and the variation of the internuclear distances B-H and N-H ( $\Delta d = d_{TS} - d_R$ ). The linear relationship shown corresponds to the relation considering  $\text{CO}_2$ ,  $\text{HCOOH}$  and  $\text{CH}_2\text{O}$  hydrogenations with a linear fit equation of  $\Delta G_{act} = 80.2\Delta d + 13.8$ ,  $R^2 = 0.90$ .

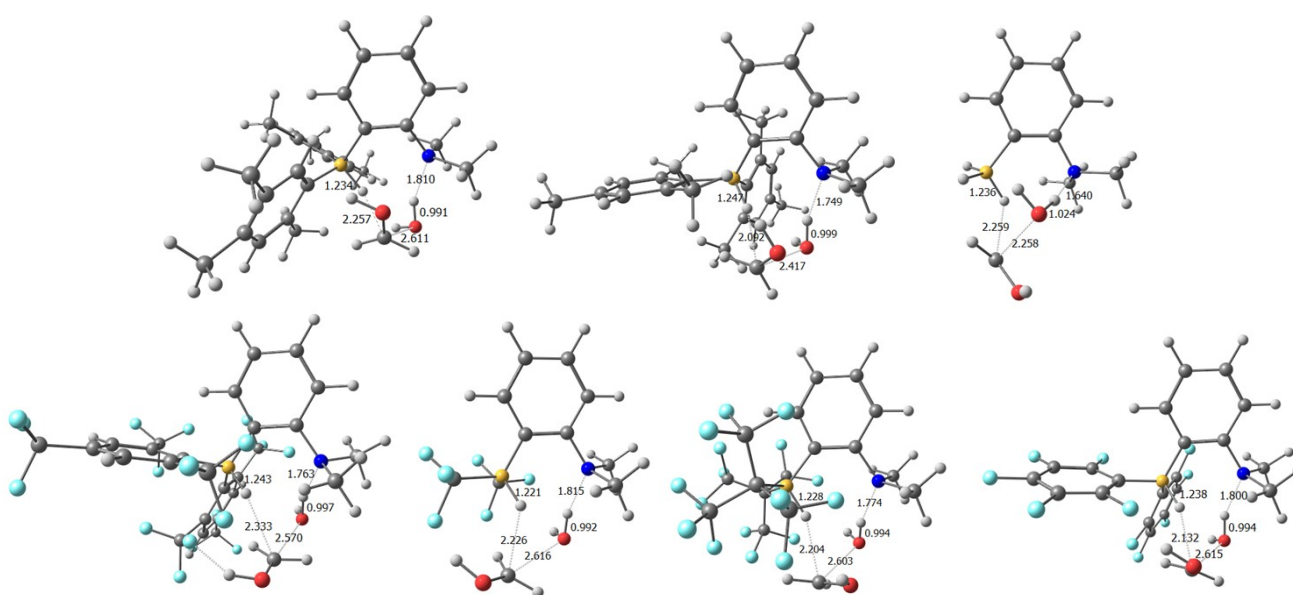

**Figure S3.** Transition state structures of the methanediol hydrogenation.

**Table S10.** Gibbs free energy obtained from the linear fit equation between  $\Delta G_{act}$  and  $\omega_B$  ( $\beta\omega_B + \alpha$ ) and the energy associated to steric effect ( $\Delta E_{steric}$ ).

| FLP                               | $\text{CO}_2$            |                     | $\text{HCOOH}$           |                     | $\text{CH}_2\text{O}$    |                     |
|-----------------------------------|--------------------------|---------------------|--------------------------|---------------------|--------------------------|---------------------|
|                                   | $\beta\omega_B + \alpha$ | $\Delta E_{steric}$ | $\beta\omega_B + \alpha$ | $\Delta E_{steric}$ | $\beta\omega_B + \alpha$ | $\Delta E_{steric}$ |
| <b>Mes</b>                        | 20.4                     | 2.4                 | 20.8                     | 6.8                 | 12.9                     | 6.3                 |
| <b>Mes'</b>                       | 16.9                     | 3.4                 | 17.7                     | 5.7                 | 11.1                     | 5.3                 |
| <b>H</b>                          | 21.5                     | -1.7                | 21.7                     | 1.6                 | 13.5                     | 0.7                 |
| <b>FMes</b>                       | 28.1                     | 11.6                | 27.3                     | 17.5                | 17.0                     | 7.8                 |
| <b>CF<sub>3</sub></b>             | 42.5                     | 2.2                 | 39.5                     | -1.6                | 24.5                     | -1.5                |
| <b>PFtb</b>                       | 63.2                     | -1.3                | 57.0                     | 1.0                 | 35.3                     | 0.6                 |
| <b>C<sub>6</sub>F<sub>5</sub></b> | 32.1                     | 0.7                 | 30.6                     | -1.0                | 19.0                     | 0.0                 |

#### 4. Activation Strain Model analysis of methanediol hydrogenation

As we have seen, the methanediol is the limiting step, showing gibbs free energies that range from 49.7 to 69.8 kcal/mol, which avoids the methanol formation following this mechanism. Moreover, we have seen that there exists a correlation between the activation energy and the interaction energy between the fragments in some cases and with the distortion energy in others. For that reason, we have analysed the mechanism of this kinetic step in detail, employing the Activation Strain Model of reactivity (*Angew. Chem. Int. Ed.* 2017, 56, 10070–10086) to analyse the main factors that are governing the activation free energy of these reactions. Fig S4 shows the ASM profile for all reactions, where it can be seen that the reaction is dominated by the strain energy, which we have decomposed it in terms of the strain of both reagents and we have found that the strain of both in similar extent are dominating the activation energy of this process. Another interesting result is that the interaction energy between the fragments is always negative, i.e., it is attractive from the beginning of the reaction.

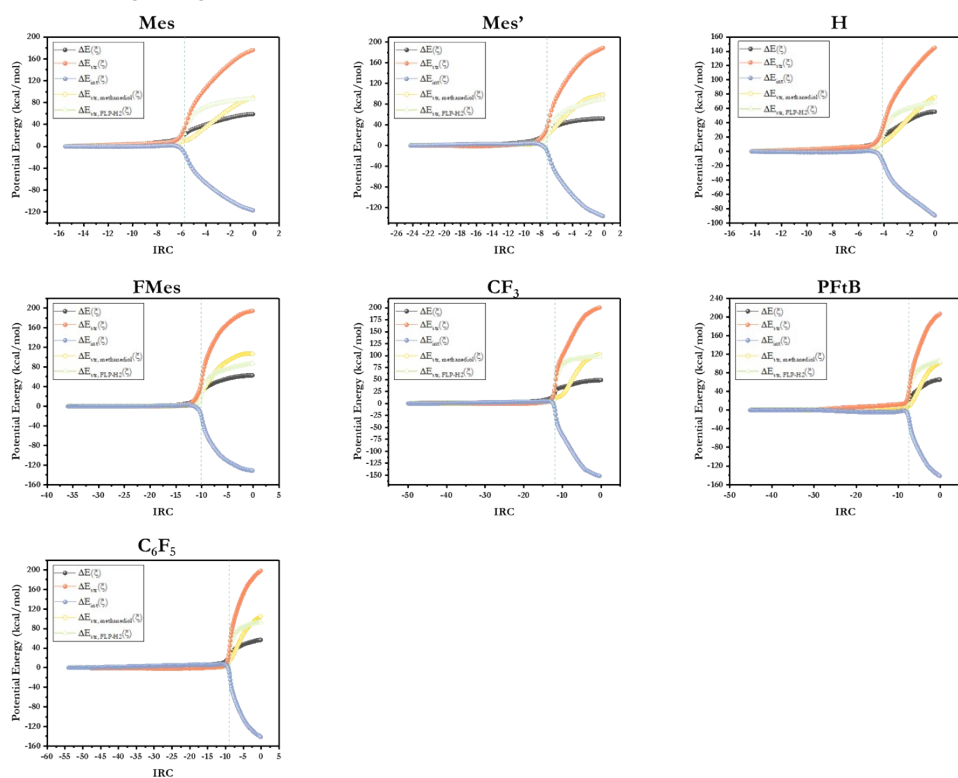

**Figure S4.** ASM diagrams of the methanediol hydrogenation employing the seven catalysts analysed in this work. The total, strain and interaction energies are represented by the black, red and blue lines respectively. The strain energy was partitioned in terms of the strain of methanediol and the catalyst, which are depicted in yellow and green lines, respectively.

## 5. Analysis of catalytic activity

**Table S11.** Absolute TOF values for methanol formation and all the intermediates of the catalytic cycle, obtained from ESM in h<sup>-1</sup> employing the ZPE corrected electronic energy at 353 K.

| FLP                           | TOF HCOOH             | TOF Methanediol       | TOF Methanol from methanediol | TOF Methanol from formaldehyde |
|-------------------------------|-----------------------|-----------------------|-------------------------------|--------------------------------|
| Mes                           | 1.0x10 <sup>7</sup>   | 2.0x10 <sup>4</sup>   | 3.0x10 <sup>-16</sup>         | 1.2x10 <sup>4</sup>            |
| Mes'                          | 2.0x10 <sup>7</sup>   | 1.0x10 <sup>6</sup>   | 1.2x10 <sup>-8</sup>          | 8.8x10 <sup>5</sup>            |
| H                             | 8.9x10 <sup>7</sup>   | 7.7x10 <sup>7</sup>   | 6.9x10 <sup>-14</sup>         | 7.5x10 <sup>7</sup>            |
| FMes                          | 6.2x10 <sup>-3</sup>  | 5.8x10 <sup>-5</sup>  | 3.5x10 <sup>-12</sup>         | 5.8x10 <sup>-5</sup>           |
| CF <sub>3</sub>               | 4.0x10 <sup>-7</sup>  | 4.1x10 <sup>-7</sup>  | 3.5x10 <sup>-7</sup>          | 4.1x10 <sup>-7</sup>           |
| PFtB                          | 1.2x10 <sup>-22</sup> | 1.3x10 <sup>-17</sup> | 9.6x10 <sup>-18</sup>         | 1.3x10 <sup>-17</sup>          |
| C <sub>6</sub> F <sub>5</sub> | 6.0x10 <sup>-1</sup>  | 6.1x10 <sup>-1</sup>  | 1.8x10 <sup>-9</sup>          | 6.1x10 <sup>-1</sup>           |

**Table S12.** Absolute TOF values for methanol formation and all the intermediates of the catalytic cycle, obtained from ESM in h<sup>-1</sup> employing the Gibbs free energy at 353 K.

| FLP                           | TOF HCOOH             | TOF Methanediol       | TOF Methanol from methanediol | TOF Methanol from formaldehyde |
|-------------------------------|-----------------------|-----------------------|-------------------------------|--------------------------------|
| Mes                           | 1.4x10 <sup>-6</sup>  | 2.8x10 <sup>-16</sup> | 8.6x10 <sup>-41</sup>         | 2.8x10 <sup>-16</sup>          |
| Mes'                          | 1.8x10 <sup>-4</sup>  | 3.4x10 <sup>-13</sup> | 8.4x10 <sup>-33</sup>         | 3.4x10 <sup>-13</sup>          |
| H                             | 2.9x10 <sup>1</sup>   | 3.8x10 <sup>-8</sup>  | 1.8x10 <sup>-34</sup>         | 3.8x10 <sup>-8</sup>           |
| FMes                          | 3.4x10 <sup>-11</sup> | 4.4x10 <sup>-21</sup> | 1.0x10 <sup>-32</sup>         | 4.4x10 <sup>-21</sup>          |
| CF <sub>3</sub>               | 5.0x10 <sup>-12</sup> | 7.7x10 <sup>-15</sup> | 2.3x10 <sup>-24</sup>         | 1.6x10 <sup>-14</sup>          |
| PFtB                          | 1.2x10 <sup>-22</sup> | 5.0x10 <sup>-27</sup> | 1.4x10 <sup>-35</sup>         | 5.1x10 <sup>-27</sup>          |
| C <sub>6</sub> F <sub>5</sub> | 5.8x10 <sup>-5</sup>  | 1.9x10 <sup>-9</sup>  | 1.4x10 <sup>-27</sup>         | 1.9x10 <sup>-9</sup>           |

**Table S13.** Control degree of TSs and Is obtained with  $\Delta G$  and  $\Delta E+ZPE$ , shown in parenthesis, for methanol formation from methanediol hydrogenation.

| X <sub>TOF</sub> | H       | Mes'    | Mes     | FMes    | CF <sub>3</sub> | PFtB    | C <sub>6</sub> F <sub>5</sub> |
|------------------|---------|---------|---------|---------|-----------------|---------|-------------------------------|
| TS1              | 0 (0)   | 0 (0)   | 0 (0)   | 0 (0)   | 0 (0)           | 0 (0)   | 0 (0)                         |
| TS2              | 0 (0)   | 0 (0)   | 0 (0)   | 0 (0)   | 0 (0)           | 0 (0)   | 0 (0)                         |
| TS3              | 0 (0)   | 0 (0)   | 0 (0)   | 0 (0)   | 0 (0.9)         | 0 (0.7) | 0 (0)                         |
| TS4              | 0 (0)   | 0 (0)   | 0 (0)   | 0 (0)   | 0 (0)           | 0 (0)   | 0 (0)                         |
| TS5              | 0 (0)   | 0 (0)   | 0 (0)   | 0 (0)   | 0 (0)           | 0 (0)   | 0 (0)                         |
| TS6              | 1 (1)   | 1 (1)   | 1 (1)   | 1 (1)   | 1 (0.1)         | 1 (0.3) | 1 (1)                         |
| I0               | 1 (0)   | 1 (0.7) | 1 (0.7) | 1 (0)   | 0 (0)           | 0 (0)   | 0 (0)                         |
| I1               | 0 (0.6) | 0 (0)   | 0 (0)   | 0 (0.6) | 1 (0)           | 1 (0.9) | 1 (0.6)                       |
| I2               | 0 (0)   | 0 (0)   | 0 (0)   | 0 (0)   | 0 (1)           | 0 (0)   | 0 (0)                         |
| I3               | 0 (0)   | 0 (0)   | 0 (0)   | 0 (0)   | 0 (0)           | 0 (0)   | 0 (0)                         |
| I4               | 0 (0)   | 0 (0.3) | 0 (0.3) | 0 (0)   | 0 (0)           | 0 (0)   | 0 (0)                         |
| I5               | 0 (0.4) | 0 (0)   | 0 (0)   | 0 (0.4) | 0 (0)           | 0 (0.1) | 0 (0.4)                       |

**Table S14.** Control degree of TSs and Is obtained with  $\Delta G$  and  $\Delta E+ZPE$ , shown in parenthesis, for methanol formation from formaldehyde hydrogenation.

| X <sub>TOF</sub> | H       | Mes'    | Mes     | FMes  | CF <sub>3</sub> | PFtB  | C <sub>6</sub> F <sub>5</sub> |
|------------------|---------|---------|---------|-------|-----------------|-------|-------------------------------|
| TS1              | 0 (0)   | 0 (0)   | 0 (0)   | 0 (0) | 0 (0)           | 0 (0) | 0 (0)                         |
| TS2              | 0 (0)   | 0 (0)   | 0 (0)   | 0 (0) | 0 (0)           | 0 (0) | 0 (0)                         |
| TS3              | 0 (0.8) | 0 (0.9) | 0 (0.1) | 0 (0) | 0 (1)           | 0 (1) | 0 (1)                         |
| TS4              | 1 (0.2) | 1 (0)   | 1 (0.5) | 1 (1) | 1 (0)           | 1 (0) | 1 (0)                         |
| TS5              | 0 (0)   | 0 (0)   | 0 (0)   | 0 (0) | 0 (0)           | 0 (0) | 0 (0)                         |
| TS6              | 0 (0)   | 0 (0.1) | 0 (0.4) | 0 (0) | 0 (0)           | 0 (0) | 0 (0)                         |
| I0               | 1 (0)   | 1 (0.9) | 1 (0.9) | 1 (0) | 0 (0)           | 0 (0) | 0 (0)                         |
| I1               | 0 (1)   | 0 (0.1) | 0 (0)   | 0 (1) | 1 (1)           | 1 (1) | 1 (1)                         |
| I2               | 0 (0)   | 0 (0)   | 0 (0)   | 0 (0) | 0 (0)           | 0 (0) | 0 (0)                         |
| I3               | 0 (0)   | 0 (0)   | 0 (0)   | 0 (0) | 0 (0)           | 0 (0) | 0 (0)                         |
| I4               | 0 (0)   | 0 (0)   | 0 (0)   | 0 (0) | 0 (0)           | 0 (0) | 0 (0)                         |
| I5               | 0 (0)   | 0 (0)   | 0 (0.1) | 0 (0) | 0 (0)           | 0 (0) | 0 (0)                         |

**Table S15.** Control degree of TSs and Is obtained with  $\Delta G$  and  $\Delta E+ZPE$ , shown in parenthesis, for **methanediol formation**.

| X <sub>TOF</sub> | H       | Mes'  | Mes     | FMes  | CF <sub>3</sub> | PFtB  | C <sub>6</sub> F <sub>5</sub> |
|------------------|---------|-------|---------|-------|-----------------|-------|-------------------------------|
| TS1              | 0 (0)   | 0 (0) | 0 (0)   | 0 (0) | 0 (0)           | 0 (0) | 0 (0)                         |
| TS2              | 0 (0)   | 0 (0) | 0 (0)   | 0 (0) | 0.5 (0)         | 0 (0) | 0 (0)                         |
| TS3              | 0 (0.8) | 0 (1) | 0 (0.2) | 0 (0) | 0 (1)           | 0 (1) | 0 (1)                         |
| TS4              | 1 (0.2) | 1 (0) | 1 (0.8) | 1 (1) | 0.5 (0)         | 1 (0) | 1 (0)                         |
| I0               | 1 (0)   | 1 (1) | 1 (1)   | 1 (0) | 0 (0)           | 0 (0) | 0 (0)                         |
| I1               | 0 (1)   | 0 (0) | 0 (0)   | 0 (1) | 0.5 (1)         | 1 (1) | 1 (1)                         |
| I2               | 0 (0)   | 0 (0) | 0 (0)   | 0 (0) | 0 (0)           | 0 (0) | 0 (0)                         |
| I3               | 0 (0)   | 0 (0) | 0 (0)   | 0 (0) | 0.5 (0)         | 0 (0) | 0 (0)                         |

**Table S16.** Control degree of TSs and Is obtained with  $\Delta G$  and  $\Delta E+ZPE$ , shown in parenthesis, for **HCOOH formation**.

| X <sub>TOF</sub> | H     | Mes'  | Mes     | FMes  | CF <sub>3</sub> | PFtB  | C <sub>6</sub> F <sub>5</sub> |
|------------------|-------|-------|---------|-------|-----------------|-------|-------------------------------|
| TS1              | 0 (1) | 0 (1) | 0 (1)   | 0 (1) | 0 (1)           | 0 (1) | 0 (1)                         |
| TS2              | 1 (0) | 1 (0) | 1 (0)   | 1 (0) | 1 (0)           | 1 (0) | 1 (0)                         |
| I0               | 1 (0) | 1 (0) | 1 (0.2) | 1 (0) | 0 (0)           | 0 (0) | 0 (0)                         |
| I1               | 0 (1) | 0 (1) | 0 (0.8) | 0 (1) | 1 (1)           | 1 (1) | 1 (1)                         |

## 6. Cartesian Coordinates

The electronic energy reported was computed at (SMD)/M06-2X/6-311+G(d,p)//M06-2X/6-31G(d,p) level of theory (SMD: benzene).

### 1. FLPs

|                            |              |              |              |   |              |              |              |
|----------------------------|--------------|--------------|--------------|---|--------------|--------------|--------------|
| <b>H</b>                   |              |              |              | 6 | 1.537732000  | -2.042114000 | -2.833096000 |
| E(RM062X) = -391.578661426 |              |              |              | 6 | 3.377384000  | -0.965532000 | -1.706319000 |
| 6                          | -0.290715000 | -0.083299000 | -0.017452000 | 6 | 2.919594000  | -1.911784000 | -2.622034000 |
| 6                          | 1.106334000  | 0.190130000  | 0.079543000  | 6 | 0.222429000  | 0.914024000  | 1.142213000  |
| 5                          | 2.206512000  | -0.863825000 | -0.088913000 | 6 | 0.711596000  | -0.069420000 | 2.015746000  |
| 6                          | -0.164470000 | -1.759020000 | -1.831232000 | 6 | -0.162825000 | 2.151071000  | 1.690402000  |
| 1                          | 0.699978000  | -1.158698000 | -2.112990000 | 6 | 0.807462000  | 0.115893000  | 3.392145000  |
| 1                          | 0.152273000  | -2.802638000 | -1.738361000 | 6 | -0.038469000 | 2.349213000  | 3.067045000  |
| 1                          | -0.904452000 | -1.689066000 | -2.641534000 | 6 | 0.426654000  | 1.357081000  | 3.928489000  |
| 6                          | -2.125679000 | -1.649155000 | -0.418989000 | 6 | 3.135115000  | 0.842186000  | -0.006854000 |
| 1                          | -2.227508000 | -2.704789000 | -0.683049000 | 1 | 2.560527000  | 1.768961000  | 0.046423000  |
| 1                          | -2.426509000 | -1.531865000 | 0.623873000  | 1 | 3.184636000  | 0.444947000  | 1.011620000  |
| 1                          | -2.814458000 | -1.070565000 | -1.055820000 | 1 | 4.152748000  | 1.085228000  | -0.323418000 |
| 7                          | -0.741107000 | -1.264442000 | -0.589377000 | 6 | 3.892363000  | -2.767892000 | -3.388259000 |
| 1                          | 1.963295000  | -2.028696000 | -0.170232000 | 1 | 3.715481000  | -3.832552000 | -3.200818000 |
| 1                          | 3.349081000  | -0.513807000 | -0.069144000 | 1 | 3.790402000  | -2.615076000 | -4.468168000 |
| 6                          | 1.501041000  | 1.441101000  | 0.594599000  | 1 | 4.923164000  | -2.540946000 | -3.109325000 |
| 1                          | 2.565975000  | 1.652596000  | 0.645369000  | 6 | -0.708588000 | 3.267712000  | 0.831511000  |
| 6                          | 0.594917000  | 2.371975000  | 1.077399000  | 1 | -1.730820000 | 3.051069000  | 0.503675000  |
| 1                          | 0.929555000  | 3.318553000  | 1.486508000  | 1 | -0.720574000 | 4.211088000  | 1.382808000  |
| 6                          | -1.206227000 | 0.854469000  | 0.495917000  | 1 | -0.110315000 | 3.413665000  | -0.073050000 |
| 1                          | -2.271862000 | 0.667792000  | 0.440212000  | 6 | 0.527260000  | 1.613073000  | 5.409058000  |
| 6                          | -0.762308000 | 2.053652000  | 1.035778000  | 1 | -0.076569000 | 0.898288000  | 5.978725000  |
| 1                          | -1.495978000 | 2.762762000  | 1.408813000  | 1 | 1.558967000  | 1.508535000  | 5.762378000  |
| <b>Mes'</b>                |              |              |              | 1 | 0.185179000  | 2.619453000  | 5.658745000  |
| E(RM062X) = -1089.48819144 |              |              |              | 6 | -2.638085000 | -2.253154000 | 0.070744000  |
| 7                          | -2.212893000 | -0.906747000 | 0.421029000  | 1 | -2.265498000 | -2.949992000 | 0.827593000  |
| 6                          | -2.462191000 | 0.062083000  | -0.618383000 | 1 | -3.734064000 | -2.368972000 | 0.014570000  |
| 6                          | -1.354201000 | 0.786409000  | -1.072557000 | 1 | -2.210460000 | -2.532021000 | -0.895450000 |
| 5                          | 0.025310000  | 0.493424000  | -0.357948000 | 6 | -2.740407000 | -0.493055000 | 1.715016000  |
| 6                          | 1.125180000  | -0.285912000 | -1.154073000 | 1 | -3.843749000 | -0.478959000 | 1.739666000  |
| 6                          | 0.682462000  | -1.215702000 | -2.112112000 | 1 | -2.383626000 | -1.186511000 | 2.483249000  |
| 6                          | 2.518651000  | -0.156859000 | -0.960200000 | 1 | -2.367215000 | 0.504432000  | 1.959696000  |
|                            |              |              |              | 6 | -1.536028000 | 1.685108000  | -2.129718000 |
|                            |              |              |              | 1 | -0.681862000 | 2.232592000  | -2.522001000 |
|                            |              |              |              | 6 | -2.795807000 | 1.892337000  | -2.685092000 |
|                            |              |              |              | 1 | -2.921782000 | 2.599751000  | -3.498770000 |
|                            |              |              |              | 6 | -3.726733000 | 0.258022000  | -1.175758000 |
|                            |              |              |              | 1 | -4.575314000 | -0.314935000 | -0.810552000 |
|                            |              |              |              | 6 | -3.893495000 | 1.180168000  | -2.205044000 |
|                            |              |              |              | 1 | -4.875702000 | 1.334902000  | -2.640674000 |
|                            |              |              |              | 1 | 4.451599000  | -0.852739000 | -1.571036000 |
|                            |              |              |              | 1 | -0.321465000 | 3.312929000  | 3.486810000  |



|   |              |              |              |
|---|--------------|--------------|--------------|
| 1 | 1.014532000  | -1.028818000 | 1.597304000  |
| 6 | 1.317506000  | -0.983750000 | 4.286853000  |
| 1 | 0.567189000  | -1.276829000 | 5.029667000  |
| 1 | 1.578695000  | -1.869990000 | 3.704858000  |
| 1 | 2.207915000  | -0.669581000 | 4.842441000  |
| 1 | -0.387661000 | -1.295098000 | -2.296035000 |
| 6 | 0.999980000  | -3.038312000 | -3.826673000 |
| 1 | -0.090370000 | -2.995636000 | -3.868833000 |
| 1 | 1.384190000  | -2.848129000 | -4.834822000 |
| 1 | 1.287948000  | -4.062274000 | -3.564112000 |

**Mes**

E(RM062X) = -1089.48409909

|   |              |              |              |
|---|--------------|--------------|--------------|
| 7 | -2.536150000 | -0.714279000 | 0.586565000  |
| 6 | -2.507248000 | 0.209577000  | -0.520533000 |
| 6 | -1.253348000 | 0.625468000  | -0.996072000 |
| 5 | 0.085593000  | 0.187570000  | -0.284230000 |
| 6 | 1.217786000  | -0.484628000 | -1.148331000 |
| 6 | 0.901320000  | -1.523198000 | -2.057227000 |
| 6 | 2.568820000  | -0.075487000 | -1.045684000 |
| 6 | 1.902706000  | -2.107714000 | -2.829802000 |
| 6 | 3.537732000  | -0.662182000 | -1.860389000 |
| 6 | 3.226372000  | -1.678670000 | -2.759496000 |
| 6 | 0.280719000  | 0.515000000  | 1.244850000  |
| 6 | 0.518016000  | -0.528187000 | 2.163516000  |
| 6 | 0.178591000  | 1.833650000  | 1.729773000  |
| 6 | 0.652808000  | -0.241112000 | 3.521195000  |
| 6 | 0.344434000  | 2.089728000  | 3.091597000  |
| 6 | 0.582177000  | 1.064756000  | 4.004881000  |
| 6 | -3.401728000 | -1.865504000 | 0.364852000  |
| 1 | -3.194221000 | -2.614963000 | 1.135416000  |
| 1 | -4.476749000 | -1.623384000 | 0.416542000  |
| 1 | -3.194445000 | -2.304213000 | -0.614050000 |
| 6 | -2.865150000 | -0.066543000 | 1.853877000  |
| 1 | -3.921361000 | 0.251306000  | 1.894834000  |
| 1 | -2.679955000 | -0.770258000 | 2.672155000  |
| 1 | -2.226142000 | 0.804427000  | 2.006257000  |
| 6 | -1.213357000 | 1.447667000  | -2.129460000 |
| 1 | -0.246842000 | 1.740619000  | -2.534834000 |
| 6 | -2.379972000 | 1.886925000  | -2.749628000 |
| 1 | -2.325973000 | 2.528606000  | -3.623316000 |
| 6 | -3.678037000 | 0.636375000  | -1.148317000 |
| 1 | -4.642385000 | 0.299954000  | -0.777353000 |
| 6 | -3.615850000 | 1.479651000  | -2.255165000 |
| 1 | -4.531709000 | 1.805835000  | -2.738199000 |
| 1 | 4.568812000  | -0.323779000 | -1.781199000 |
| 1 | 0.277030000  | 3.115331000  | 3.449798000  |
| 1 | 1.643598000  | -2.921152000 | -3.504627000 |
| 1 | 0.819523000  | -1.058340000 | 4.220619000  |
| 6 | 0.780959000  | 1.359328000  | 5.469356000  |
| 1 | 0.392205000  | 0.549750000  | 6.092298000  |
| 1 | 1.844734000  | 1.471965000  | 5.704065000  |
| 1 | 0.279598000  | 2.286018000  | 5.759015000  |
| 6 | 0.566382000  | -1.964902000 | 1.701435000  |
| 1 | 1.369184000  | -2.126213000 | 0.975713000  |
| 1 | 0.722450000  | -2.643151000 | 2.543675000  |
| 1 | -0.378935000 | -2.232086000 | 1.214047000  |
| 6 | -0.136585000 | 2.991775000  | 0.809191000  |
| 1 | 0.439237000  | 2.955669000  | -0.121298000 |
| 1 | -1.193579000 | 2.986450000  | 0.520822000  |
| 1 | 0.077516000  | 3.945139000  | 1.298103000  |
| 6 | 3.025719000  | 0.989221000  | -0.072528000 |
| 1 | 2.415176000  | 1.894103000  | -0.127940000 |
| 1 | 2.968398000  | 0.632705000  | 0.960044000  |
| 1 | 4.060501000  | 1.271360000  | -0.280070000 |
| 6 | 4.285676000  | -2.286274000 | -3.641291000 |
| 1 | 4.068857000  | -3.335783000 | -3.854927000 |

|   |              |              |              |
|---|--------------|--------------|--------------|
| 1 | 4.340739000  | -1.759839000 | -4.600061000 |
| 1 | 5.272028000  | -2.226096000 | -3.175110000 |
| 6 | -0.502112000 | -2.074252000 | -2.185064000 |
| 1 | -1.141277000 | -1.411289000 | -2.776547000 |
| 1 | -0.482300000 | -3.052407000 | -2.671730000 |
| 1 | -0.976634000 | -2.190580000 | -1.206059000 |

**FMes**

E(RM062X) = -2875.93166574

|   |              |              |              |
|---|--------------|--------------|--------------|
| 7 | -3.106294000 | -0.410449000 | 0.795755000  |
| 6 | -3.070149000 | 0.307887000  | -0.452673000 |
| 6 | -1.834506000 | 0.451719000  | -1.107109000 |
| 5 | -0.493729000 | 0.042528000  | -0.402341000 |
| 6 | 0.684621000  | -0.610652000 | -1.279540000 |
| 6 | 0.384609000  | -1.433262000 | -2.390571000 |
| 6 | 2.059347000  | -0.299636000 | -1.120849000 |
| 6 | 1.338445000  | -1.776001000 | -3.347393000 |
| 6 | 3.011404000  | -0.629232000 | -2.080635000 |
| 6 | 2.639802000  | -1.327669000 | -3.218508000 |
| 6 | -0.362538000 | 0.586282000  | 1.094223000  |
| 6 | -0.417255000 | -0.239442000 | 2.222310000  |
| 6 | -0.309780000 | 1.964995000  | 1.347983000  |
| 6 | -0.409871000 | 0.256546000  | 3.518084000  |
| 6 | -0.290413000 | 2.487034000  | 2.638534000  |
| 6 | -0.344312000 | 1.628355000  | 3.725354000  |
| 6 | 2.622070000  | 0.310442000  | 0.150981000  |
| 6 | 3.652753000  | -1.612848000 | -4.294126000 |
| 6 | -0.320847000 | 2.964481000  | 0.219126000  |
| 6 | -0.396101000 | 2.170559000  | 5.125620000  |
| 6 | -3.864076000 | -1.655820000 | 0.702439000  |
| 1 | -3.719576000 | -2.223978000 | 1.624799000  |
| 1 | -4.944646000 | -1.486852000 | 0.562357000  |
| 1 | -3.492598000 | -2.248356000 | -0.133449000 |
| 6 | -3.578866000 | 0.409517000  | 1.905202000  |
| 1 | -4.650606000 | 0.657886000  | 1.835792000  |
| 1 | -3.412756000 | -0.136844000 | 2.839532000  |
| 1 | -3.008888000 | 1.342538000  | 1.940581000  |
| 6 | -1.814637000 | 1.096949000  | -2.352715000 |
| 1 | -0.870684000 | 1.210804000  | -2.879079000 |
| 6 | -2.972325000 | 1.620291000  | -2.915214000 |
| 1 | -2.929951000 | 2.128938000  | -3.872449000 |
| 6 | -4.234249000 | 0.819991000  | -1.023767000 |
| 1 | -5.183536000 | 0.692860000  | -0.510400000 |
| 6 | -4.185221000 | 1.482665000  | -2.246438000 |
| 1 | -5.095621000 | 1.883064000  | -2.681395000 |
| 1 | 4.049791000  | -0.363152000 | -1.930572000 |
| 1 | -0.226531000 | 3.558715000  | 2.790702000  |
| 6 | -0.958232000 | -2.107610000 | -2.627410000 |
| 1 | 1.064945000  | -2.413194000 | -4.180552000 |
| 1 | -0.453826000 | -0.424043000 | 4.363069000  |
| 6 | -0.501248000 | -1.732485000 | 2.085917000  |
| 9 | -1.668563000 | -2.268126000 | -1.507169000 |
| 9 | -0.757887000 | -3.339796000 | -3.127730000 |
| 9 | -1.715401000 | -1.460267000 | -3.518361000 |
| 9 | 3.686082000  | -0.624377000 | -5.197351000 |
| 9 | 4.885529000  | -1.730434000 | -3.786675000 |
| 9 | 3.365453000  | -2.743370000 | -4.950037000 |
| 9 | 2.231696000  | -0.393844000 | 1.223367000  |
| 9 | 2.268005000  | 1.586223000  | 0.344961000  |
| 9 | 3.962215000  | 0.290531000  | 0.148875000  |
| 9 | -0.638018000 | -2.122071000 | 0.808474000  |
| 9 | 0.594306000  | -2.331797000 | 2.569584000  |
| 9 | -1.545913000 | -2.223851000 | 2.771818000  |
| 9 | 0.129760000  | 3.399004000  | 5.201012000  |
| 9 | 0.270048000  | 1.382192000  | 5.979328000  |
| 9 | -1.659544000 | 2.249407000  | 5.568864000  |

|   |              |             |              |
|---|--------------|-------------|--------------|
| 9 | 0.356576000  | 4.074006000 | 0.536390000  |
| 9 | 0.234883000  | 2.470418000 | -0.904620000 |
| 9 | -1.569506000 | 3.336981000 | -0.089745000 |

**CF<sub>3</sub>**

E(RM062X) = -1065.69168964

|   |              |              |              |
|---|--------------|--------------|--------------|
| 7 | -1.397212000 | -1.418218000 | 1.207968000  |
| 6 | -1.810352000 | -0.209943000 | 0.654858000  |
| 6 | -0.954528000 | 0.428140000  | -0.283084000 |
| 5 | 0.532116000  | 0.140634000  | -0.347113000 |
| 6 | -2.021145000 | -1.849989000 | 2.442145000  |
| 1 | -3.032198000 | -2.260838000 | 2.289920000  |
| 1 | -1.401162000 | -2.631815000 | 2.887553000  |
| 1 | -2.073901000 | -1.014730000 | 3.142731000  |
| 6 | -1.103193000 | -2.536012000 | 0.315836000  |
| 1 | -2.005617000 | -3.140944000 | 0.137974000  |
| 1 | -0.741314000 | -2.172182000 | -0.645871000 |
| 1 | -0.330988000 | -3.169013000 | 0.757136000  |
| 6 | 1.423855000  | -0.360921000 | 0.900599000  |
| 9 | 2.641836000  | 0.221660000  | 0.860702000  |
| 9 | 0.912232000  | -0.064527000 | 2.105158000  |
| 9 | 1.633278000  | -1.695202000 | 0.864739000  |
| 6 | 1.414215000  | 0.526210000  | -1.635485000 |
| 9 | 1.911938000  | 1.773358000  | -1.498414000 |
| 9 | 2.454114000  | -0.308770000 | -1.809112000 |
| 9 | 0.717389000  | 0.513888000  | -2.790113000 |
| 6 | -1.421490000 | 1.570714000  | -0.966637000 |
| 1 | -0.786209000 | 2.036978000  | -1.713370000 |
| 6 | -2.640639000 | 2.147228000  | -0.647404000 |
| 1 | -2.976272000 | 3.044381000  | -1.154577000 |
| 6 | -3.027751000 | 0.396280000  | 0.993045000  |
| 1 | -3.683485000 | -0.060648000 | 1.724994000  |
| 6 | -3.423570000 | 1.563157000  | 0.349793000  |
| 1 | -4.378742000 | 2.008549000  | 0.611951000  |

**PFtB**

E(RM062X) = -2492.44015028

|   |              |              |              |
|---|--------------|--------------|--------------|
| 7 | -2.018374000 | -2.076375000 | 0.440249000  |
| 6 | -2.646376000 | -0.777594000 | 0.401910000  |
| 6 | -1.828307000 | 0.344185000  | 0.208745000  |
| 5 | -0.267860000 | 0.195534000  | 0.065789000  |
| 6 | 0.679408000  | 0.615699000  | 1.400340000  |
| 6 | 0.293707000  | -0.133604000 | -1.477084000 |
| 6 | -0.232114000 | 1.038106000  | 2.594073000  |
| 9 | -1.043630000 | 2.045378000  | 2.285076000  |
| 9 | -0.984101000 | 0.005309000  | 2.991039000  |
| 9 | 0.477617000  | 1.439648000  | 3.650145000  |
| 6 | 1.713778000  | 1.772248000  | 1.270301000  |
| 9 | 2.567625000  | 1.741809000  | 2.299773000  |
| 9 | 2.447594000  | 1.726217000  | 0.167865000  |
| 9 | 1.089934000  | 2.954053000  | 1.291203000  |
| 6 | 1.443964000  | -0.655236000 | 1.846707000  |
| 9 | 1.681634000  | -0.699612000 | 3.155360000  |
| 9 | 0.715532000  | -1.739650000 | 1.539922000  |
| 9 | 2.616829000  | -0.751836000 | 1.223610000  |
| 6 | 1.659310000  | -0.870588000 | -1.615654000 |
| 9 | 2.698817000  | -0.127249000 | -1.262402000 |
| 9 | 1.649789000  | -1.965148000 | -0.851729000 |
| 9 | 1.887128000  | -1.264352000 | -2.871905000 |
| 6 | 0.349487000  | 1.290312000  | -2.101436000 |
| 9 | 0.361904000  | 2.215674000  | -1.110095000 |
| 9 | 1.417919000  | 1.490172000  | -2.859101000 |
| 9 | -0.735550000 | 1.565771000  | -2.821898000 |
| 6 | -0.670887000 | -0.964700000 | -2.384232000 |
| 9 | -0.369445000 | -0.780776000 | -3.676869000 |
| 9 | -0.543530000 | -2.266803000 | -2.127835000 |

|   |              |              |              |
|---|--------------|--------------|--------------|
| 9 | -1.953380000 | -0.636996000 | -2.256627000 |
| 6 | -2.673877000 | -3.043964000 | -0.446763000 |
| 1 | -2.005091000 | -3.897782000 | -0.583949000 |
| 1 | -3.621478000 | -3.417992000 | -0.028535000 |
| 1 | -2.872150000 | -2.596144000 | -1.418454000 |
| 6 | -1.978981000 | -2.656079000 | 1.786797000  |
| 1 | -2.990073000 | -2.897615000 | 2.153070000  |
| 1 | -1.395823000 | -3.580392000 | 1.750105000  |
| 1 | -1.505185000 | -1.978161000 | 2.488356000  |
| 6 | -2.435723000 | 1.598868000  | 0.055332000  |
| 1 | -1.822962000 | 2.479521000  | -0.108708000 |
| 6 | -3.817358000 | 1.736810000  | 0.109382000  |
| 1 | -4.266430000 | 2.715070000  | -0.024266000 |
| 6 | -4.030693000 | -0.630969000 | 0.486352000  |
| 1 | -4.652055000 | -1.506759000 | 0.648331000  |
| 6 | -4.616537000 | 0.621246000  | 0.339813000  |
| 1 | -5.695275000 | 0.724819000  | 0.397178000  |

**C<sub>6</sub>F<sub>5</sub>**

E(RM062X) = -1845.99811827

|   |              |              |              |
|---|--------------|--------------|--------------|
| 7 | -2.686534000 | -1.771928000 | -0.229288000 |
| 6 | -3.039839000 | -0.537012000 | 0.319116000  |
| 6 | -2.015164000 | 0.365624000  | 0.704674000  |
| 5 | -0.529645000 | 0.204386000  | 0.306222000  |
| 6 | -1.758326000 | -2.635451000 | 0.484143000  |
| 1 | -1.215446000 | -2.068841000 | 1.243395000  |
| 1 | -2.294814000 | -3.448168000 | 0.996212000  |
| 1 | -1.033154000 | -3.081666000 | -0.206726000 |
| 6 | -3.677163000 | -2.505033000 | -0.986491000 |
| 1 | -3.165675000 | -3.269175000 | -1.579128000 |
| 1 | -4.422374000 | -3.011677000 | -0.351955000 |
| 1 | -4.191439000 | -1.829352000 | -1.673232000 |
| 6 | 0.577724000  | 0.775360000  | 1.272806000  |
| 6 | 0.490532000  | 0.598145000  | 2.654584000  |
| 6 | 1.699322000  | 1.468619000  | 0.816428000  |
| 6 | 1.447092000  | 1.083039000  | 3.536738000  |
| 6 | 2.666086000  | 1.981650000  | 1.666938000  |
| 6 | 2.535593000  | 1.784557000  | 3.036696000  |
| 6 | -0.081286000 | -0.448648000 | -1.057499000 |
| 6 | 1.131481000  | -1.129143000 | -1.186175000 |
| 6 | -0.870903000 | -0.405499000 | -2.211451000 |
| 6 | 1.540541000  | -1.742858000 | -2.362361000 |
| 6 | -0.490559000 | -0.998710000 | -3.405855000 |
| 6 | 0.721824000  | -1.673366000 | -3.479913000 |
| 9 | 1.333445000  | 0.879975000  | 4.846272000  |
| 9 | -0.520058000 | -0.095882000 | 3.183997000  |
| 9 | 3.454634000  | 2.261895000  | 3.864575000  |
| 9 | 3.710994000  | 2.652893000  | 1.191668000  |
| 9 | 1.869430000  | 1.673188000  | -0.492264000 |
| 9 | 1.957154000  | -1.244273000 | -0.140924000 |
| 9 | 2.700250000  | -2.392015000 | -2.425190000 |
| 9 | 1.093476000  | -2.248365000 | -4.615529000 |
| 9 | -1.273108000 | -0.928407000 | -4.480283000 |
| 9 | -2.039357000 | 0.233296000  | -2.217460000 |
| 6 | -2.389939000 | 1.564999000  | 1.333396000  |
| 1 | -1.610698000 | 2.251752000  | 1.654414000  |
| 6 | -3.720581000 | 1.927868000  | 1.495970000  |
| 1 | -3.982732000 | 2.872741000  | 1.958325000  |
| 6 | -4.381090000 | -0.164759000 | 0.472738000  |
| 1 | -5.172451000 | -0.842703000 | 0.174655000  |
| 6 | -4.710459000 | 1.059122000  | 1.045365000  |
| 1 | -5.757475000 | 1.321973000  | 1.163092000  |

**2. FLP + H<sub>2</sub> (TS)**

**H**

E(RM062X) = -392.745291061

|   |              |              |              |
|---|--------------|--------------|--------------|
| 6 | -1.318005000 | 1.682418000  | 0.632916000  |
| 6 | 0.028507000  | 1.849390000  | 0.984705000  |
| 5 | 1.042121000  | 0.627009000  | 0.792090000  |
| 6 | -1.610450000 | 0.308732000  | -1.342517000 |
| 1 | -0.648971000 | 0.695635000  | -1.683861000 |
| 1 | -1.716456000 | -0.729914000 | -1.667479000 |
| 1 | -2.418558000 | 0.909476000  | -1.779473000 |
| 6 | -2.875302000 | -0.219419000 | 0.667456000  |
| 1 | -2.918697000 | -1.275961000 | 0.390627000  |
| 1 | -2.863030000 | -0.132200000 | 1.754943000  |
| 1 | -3.774220000 | 0.276500000  | 0.279224000  |
| 7 | -1.649003000 | 0.363877000  | 0.124552000  |
| 1 | -0.371522000 | -0.238095000 | 0.622354000  |
| 1 | 0.385189000  | -0.551829000 | 0.994013000  |
| 1 | 1.477948000  | 0.480224000  | -0.321444000 |
| 1 | 1.836433000  | 0.459079000  | 1.676329000  |
| 6 | 0.392207000  | 3.104893000  | 1.484787000  |
| 1 | 1.422926000  | 3.273859000  | 1.783503000  |
| 6 | -0.536919000 | 4.133505000  | 1.616004000  |
| 1 | -0.225759000 | 5.097320000  | 2.007091000  |
| 6 | -2.267397000 | 2.691482000  | 0.764979000  |
| 1 | -3.303242000 | 2.520061000  | 0.484693000  |
| 6 | -1.868574000 | 3.929596000  | 1.258825000  |
| 1 | -2.594024000 | 4.729454000  | 1.366083000  |

Mes'

E(RM062X) = -1090.64428135

|   |              |              |              |
|---|--------------|--------------|--------------|
| 7 | -0.981831000 | 0.950348000  | 0.765081000  |
| 6 | -1.016301000 | 1.884850000  | -0.346268000 |
| 6 | 0.228415000  | 2.348258000  | -0.793370000 |
| 5 | 1.585089000  | 1.864702000  | -0.048770000 |
| 6 | 2.804535000  | 1.498114000  | -1.041973000 |
| 6 | 2.471070000  | 1.015382000  | -2.319462000 |
| 6 | 4.180380000  | 1.578526000  | -0.734309000 |
| 6 | 3.402531000  | 0.638116000  | -3.282487000 |
| 6 | 5.117532000  | 1.211889000  | -1.706359000 |
| 6 | 4.764785000  | 0.748655000  | -2.970047000 |
| 6 | 1.826979000  | 2.599330000  | 1.368731000  |
| 6 | 1.752138000  | 1.902129000  | 2.581901000  |
| 6 | 2.105597000  | 3.977319000  | 1.444201000  |
| 6 | 1.925381000  | 2.496183000  | 3.831478000  |
| 6 | 2.285712000  | 4.578372000  | 2.691462000  |
| 6 | 2.196379000  | 3.870656000  | 3.888469000  |
| 6 | 4.715554000  | 2.032881000  | 0.604822000  |
| 1 | 4.508070000  | 3.090211000  | 0.794067000  |
| 1 | 4.267885000  | 1.477417000  | 1.432144000  |
| 1 | 5.798565000  | 1.890767000  | 0.642750000  |
| 6 | 5.819399000  | 0.366660000  | -3.974916000 |
| 1 | 5.722918000  | -0.682268000 | -4.276467000 |
| 1 | 5.737294000  | 0.967228000  | -4.887649000 |
| 1 | 6.822002000  | 0.509562000  | -3.566324000 |
| 6 | 2.243712000  | 4.816836000  | 0.197606000  |
| 1 | 1.264646000  | 5.073543000  | -0.220263000 |
| 1 | 2.773359000  | 5.748977000  | 0.410726000  |
| 1 | 2.797444000  | 4.278992000  | -0.580341000 |
| 6 | 2.395346000  | 4.562259000  | 5.211776000  |
| 1 | 1.508377000  | 4.472456000  | 5.848853000  |
| 1 | 3.231659000  | 4.126595000  | 5.769523000  |
| 1 | 2.602040000  | 5.625341000  | 5.071536000  |
| 6 | -1.675522000 | -0.311732000 | 0.498048000  |
| 1 | -1.475218000 | -1.005526000 | 1.318787000  |
| 1 | -2.760946000 | -0.176727000 | 0.411776000  |
| 1 | -1.295580000 | -0.737780000 | -0.432811000 |
| 6 | -1.418611000 | 1.562366000  | 2.027353000  |
| 1 | -2.500356000 | 1.753393000  | 2.011536000  |
| 1 | -1.184005000 | 0.888802000  | 2.856645000  |

|   |              |              |              |
|---|--------------|--------------|--------------|
| 1 | -0.882423000 | 2.500202000  | 2.173234000  |
| 6 | 0.206159000  | 3.228457000  | -1.884688000 |
| 1 | 1.150826000  | 3.583666000  | -2.288710000 |
| 6 | -0.985780000 | 3.638405000  | -2.473812000 |
| 1 | -0.965306000 | 4.325019000  | -3.314439000 |
| 6 | -2.221428000 | 2.270746000  | -0.929880000 |
| 1 | -3.164199000 | 1.884219000  | -0.551330000 |
| 6 | -2.205585000 | 3.162202000  | -1.995845000 |
| 1 | -3.136908000 | 3.478416000  | -2.454265000 |
| 1 | 6.175404000  | 1.285889000  | -1.460182000 |
| 1 | 2.509897000  | 5.643276000  | 2.731374000  |
| 1 | 1.553654000  | 0.829365000  | 2.561654000  |
| 6 | 1.825007000  | 1.679379000  | 5.093675000  |
| 1 | 1.033909000  | 2.053907000  | 5.753173000  |
| 1 | 1.607584000  | 0.632913000  | 4.866879000  |
| 1 | 2.757022000  | 1.711148000  | 5.668668000  |
| 1 | 1.417832000  | 0.924765000  | -2.579782000 |
| 6 | 2.960520000  | 0.126321000  | -4.628901000 |
| 1 | 1.870904000  | 0.110438000  | -4.702149000 |
| 1 | 3.343585000  | 0.752445000  | -5.442532000 |
| 1 | 3.326491000  | -0.890116000 | -4.817322000 |
| 1 | 1.325718000  | 0.535414000  | 0.373596000  |
| 1 | 0.490443000  | 0.696083000  | 0.624829000  |

Mes

E(RM062X) = -1090.63691784

|   |              |              |              |
|---|--------------|--------------|--------------|
| 7 | -1.315662000 | 1.541078000  | 0.658878000  |
| 6 | -1.045071000 | 2.418537000  | -0.455018000 |
| 6 | 0.290383000  | 2.588398000  | -0.860711000 |
| 5 | 1.540220000  | 1.954730000  | -0.086030000 |
| 6 | 2.719964000  | 1.412438000  | -1.034988000 |
| 6 | 2.483996000  | 0.417228000  | -2.016464000 |
| 6 | 4.020772000  | 1.969724000  | -0.970575000 |
| 6 | 3.514144000  | -0.008017000 | -2.856892000 |
| 6 | 5.019912000  | 1.526968000  | -1.839804000 |
| 6 | 4.794480000  | 0.529338000  | -2.782530000 |
| 6 | 1.832199000  | 2.415265000  | 1.426978000  |
| 6 | 2.362383000  | 1.505738000  | 2.371425000  |
| 6 | 1.608099000  | 3.746127000  | 1.859484000  |
| 6 | 2.601330000  | 1.906017000  | 3.688833000  |
| 6 | 1.869806000  | 4.111020000  | 3.180729000  |
| 6 | 2.351542000  | 3.202953000  | 4.120230000  |
| 6 | -2.329770000 | 0.532405000  | 0.373880000  |
| 1 | -2.329225000 | -0.206162000 | 1.181026000  |
| 1 | -3.347232000 | 0.946877000  | 0.296568000  |
| 1 | -2.087390000 | 0.026874000  | -0.564142000 |
| 6 | -1.608563000 | 2.255459000  | 1.899520000  |
| 1 | -2.570192000 | 2.792024000  | 1.846654000  |
| 1 | -1.655640000 | 1.536526000  | 2.722874000  |
| 1 | -0.811160000 | 2.967951000  | 2.113687000  |
| 6 | 0.522848000  | 3.380394000  | -1.994106000 |
| 1 | 1.545173000  | 3.493145000  | -2.349005000 |
| 6 | -0.510450000 | 4.023158000  | -2.667502000 |
| 1 | -0.294941000 | 4.639082000  | -3.534895000 |
| 6 | -2.088844000 | 3.049385000  | -1.135495000 |
| 1 | -3.113299000 | 2.904372000  | -0.802979000 |
| 6 | -1.823359000 | 3.862709000  | -2.232031000 |
| 1 | -2.638519000 | 4.357878000  | -2.750220000 |
| 1 | 6.006562000  | 1.982025000  | -1.778645000 |
| 1 | 1.700636000  | 5.142686000  | 3.483519000  |
| 1 | 1.046385000  | 0.380133000  | 0.219500000  |
| 1 | 0.378156000  | 0.691257000  | 0.468583000  |
| 1 | 3.304577000  | -0.776789000 | -3.598187000 |
| 1 | 3.008888000  | 1.182514000  | 4.392480000  |
| 6 | 2.589581000  | 3.615119000  | 5.549640000  |
| 1 | 1.662195000  | 3.566506000  | 6.130160000  |
| 1 | 3.317408000  | 2.960233000  | 6.034635000  |

|   |             |              |              |
|---|-------------|--------------|--------------|
| 1 | 2.959109000 | 4.642120000  | 5.609187000  |
| 6 | 2.708995000 | 0.074143000  | 2.023382000  |
| 1 | 3.422707000 | -0.326402000 | 2.746796000  |
| 1 | 1.824553000 | -0.573288000 | 2.050163000  |
| 1 | 3.152101000 | -0.012307000 | 1.028099000  |
| 6 | 1.115402000 | 4.846542000  | 0.941489000  |
| 1 | 1.665103000 | 4.877903000  | -0.002873000 |
| 1 | 0.059107000 | 4.726705000  | 0.678778000  |
| 1 | 1.232648000 | 5.817168000  | 1.429143000  |
| 6 | 4.403674000 | 3.067735000  | -0.000762000 |
| 1 | 3.681843000 | 3.888044000  | 0.001602000  |
| 1 | 4.464554000 | 2.699970000  | 1.027551000  |
| 1 | 5.378052000 | 3.480750000  | -0.272383000 |
| 6 | 5.900914000 | 0.040572000  | -3.680703000 |
| 1 | 6.457549000 | -0.774260000 | -3.205705000 |
| 1 | 5.505480000 | -0.338393000 | -4.626340000 |
| 1 | 6.613304000 | 0.839263000  | -3.901910000 |
| 6 | 1.141174000 | -0.258622000 | -2.194813000 |
| 1 | 1.101980000 | -0.766850000 | -3.160725000 |
| 1 | 0.968607000 | -1.018785000 | -1.423072000 |
| 1 | 0.311591000 | 0.450276000  | -2.150673000 |

**FMes**

E(RM062X) = -2877.07532261

|   |              |              |              |
|---|--------------|--------------|--------------|
| 7 | -1.056556000 | 1.799905000  | 0.979900000  |
| 6 | -0.856277000 | 2.454000000  | -0.289459000 |
| 6 | 0.430308000  | 2.457036000  | -0.856333000 |
| 5 | 1.695323000  | 1.874324000  | -0.095040000 |
| 6 | 2.860138000  | 1.250518000  | -1.032914000 |
| 6 | 2.566760000  | 0.362664000  | -2.106433000 |
| 6 | 4.202006000  | 1.704040000  | -0.984535000 |
| 6 | 3.487737000  | 0.086395000  | -3.112001000 |
| 6 | 5.115302000  | 1.440326000  | -2.006814000 |
| 6 | 4.743127000  | 0.670854000  | -3.090917000 |
| 6 | 1.898982000  | 2.385638000  | 1.425144000  |
| 6 | 2.120231000  | 1.545207000  | 2.535863000  |
| 6 | 1.770908000  | 3.759159000  | 1.726519000  |
| 6 | 2.089343000  | 2.015983000  | 3.845353000  |
| 6 | 1.765868000  | 4.240864000  | 3.033194000  |
| 6 | 1.886610000  | 3.362599000  | 4.095991000  |
| 6 | 4.808622000  | 2.415806000  | 0.217394000  |
| 6 | 5.691518000  | 0.446380000  | -4.236259000 |
| 6 | 1.619812000  | 4.845777000  | 0.677059000  |
| 6 | 1.780302000  | 3.863561000  | 5.508622000  |
| 6 | -1.946800000 | 0.645436000  | 0.871896000  |
| 1 | -1.910296000 | 0.081977000  | 1.809465000  |
| 1 | -2.993184000 | 0.928579000  | 0.675981000  |
| 1 | -1.606468000 | -0.002732000 | 0.060300000  |
| 6 | -1.495522000 | 2.705190000  | 2.037196000  |
| 1 | -2.546077000 | 3.017148000  | 1.917879000  |
| 1 | -1.394238000 | 2.202800000  | 3.004596000  |
| 1 | -0.871516000 | 3.599234000  | 2.036511000  |
| 6 | 0.576493000  | 3.031337000  | -2.128591000 |
| 1 | 1.557951000  | 3.043374000  | -2.595438000 |
| 6 | -0.491265000 | 3.615667000  | -2.796429000 |
| 1 | -0.340389000 | 4.066398000  | -3.771758000 |
| 6 | -1.934546000 | 3.025619000  | -0.965993000 |
| 1 | -2.920783000 | 3.004739000  | -0.509774000 |
| 6 | -1.754431000 | 3.616718000  | -2.210228000 |
| 1 | -2.596570000 | 4.069052000  | -2.724261000 |
| 1 | 6.125132000  | 1.823029000  | -1.944982000 |
| 1 | 1.675532000  | 5.305148000  | 3.217775000  |
| 1 | 1.031796000  | 0.083767000  | 0.291153000  |
| 1 | 0.520228000  | 0.521718000  | 0.625703000  |
| 6 | 1.333235000  | -0.533905000 | -2.153299000 |
| 1 | 3.231450000  | -0.597736000 | -3.910558000 |
| 1 | 2.253690000  | 1.331575000  | 4.669994000  |

|   |             |              |              |
|---|-------------|--------------|--------------|
| 6 | 2.403234000 | 0.058051000  | 2.443343000  |
| 9 | 0.158999000 | 0.075320000  | -1.980331000 |
| 9 | 1.434778000 | -1.472850000 | -1.193481000 |
| 9 | 1.246547000 | -1.187159000 | -3.320565000 |
| 9 | 5.446020000 | 1.298756000  | -5.240602000 |
| 9 | 6.964800000 | 0.621970000  | -3.864503000 |
| 9 | 5.572100000 | -0.791998000 | -4.731515000 |
| 9 | 4.653686000 | 1.690247000  | 1.333693000  |
| 9 | 4.301582000 | 3.630257000  | 0.449763000  |
| 9 | 6.129663000 | 2.588927000  | 0.062802000  |
| 9 | 2.933890000 | -0.326691000 | 1.275005000  |
| 9 | 3.270202000 | -0.312083000 | 3.396570000  |
| 9 | 1.288149000 | -0.666306000 | 2.637581000  |
| 9 | 2.211938000 | 5.126135000  | 5.616767000  |
| 9 | 2.492816000 | 3.108915000  | 6.354218000  |
| 9 | 0.508384000 | 3.842016000  | 5.934220000  |
| 9 | 2.179636000 | 5.989177000  | 1.102476000  |
| 9 | 2.201349000 | 4.551776000  | -0.491950000 |
| 9 | 0.329793000 | 5.122452000  | 0.430491000  |

**CF<sub>3</sub>**

E(RM062X) = -1066.85648130

|   |              |              |              |
|---|--------------|--------------|--------------|
| 7 | -0.659407000 | 0.079811000  | 0.399577000  |
| 6 | -1.116608000 | 1.375647000  | -0.032809000 |
| 6 | -0.213564000 | 2.162405000  | -0.765155000 |
| 5 | 1.268678000  | 1.722817000  | -0.911323000 |
| 1 | 1.298286000  | 0.091221000  | -1.885457000 |
| 1 | 0.975758000  | -0.091931000 | -1.228216000 |
| 6 | -0.786065000 | -0.136964000 | 1.839085000  |
| 1 | -1.833624000 | -0.249409000 | 2.161787000  |
| 1 | -0.247011000 | -1.051394000 | 2.102403000  |
| 1 | -0.333734000 | 0.697074000  | 2.373351000  |
| 6 | -1.320620000 | -0.992015000 | -0.344194000 |
| 1 | -2.394854000 | -1.068913000 | -0.111208000 |
| 1 | -1.219519000 | -0.817613000 | -1.418935000 |
| 1 | -0.844657000 | -1.945183000 | -0.095782000 |
| 6 | 2.165052000  | 1.335516000  | 0.383463000  |
| 9 | 3.338334000  | 2.002507000  | 0.340557000  |
| 9 | 1.570785000  | 1.705086000  | 1.536001000  |
| 9 | 2.462695000  | 0.029654000  | 0.498357000  |
| 6 | 2.123670000  | 2.260998000  | -2.163655000 |
| 9 | 2.471373000  | 3.546334000  | -1.941439000 |
| 9 | 3.256128000  | 1.568667000  | -2.382016000 |
| 9 | 1.430261000  | 2.236668000  | -3.320183000 |
| 6 | -0.653040000 | 3.389558000  | -1.282551000 |
| 1 | 0.029608000  | 4.003357000  | -1.862436000 |
| 6 | -1.946057000 | 3.840921000  | -1.040001000 |
| 1 | -2.269924000 | 4.798697000  | -1.433025000 |
| 6 | -2.416355000 | 1.820453000  | 0.197770000  |
| 1 | -3.109850000 | 1.200065000  | 0.758730000  |
| 6 | -2.824523000 | 3.057073000  | -0.296132000 |
| 1 | -3.835977000 | 3.404215000  | -0.109572000 |

**PFtB**

E(RM062X) = -2493.59669882

|   |              |             |              |
|---|--------------|-------------|--------------|
| 7 | -0.871925000 | 0.091744000 | 0.358858000  |
| 6 | -1.251346000 | 1.408798000 | -0.082442000 |
| 6 | -0.268302000 | 2.340284000 | -0.472564000 |
| 5 | 1.294552000  | 2.057926000 | -0.576343000 |
| 6 | 2.242398000  | 2.297637000 | 0.825793000  |
| 6 | 1.836485000  | 1.917168000 | -2.176929000 |
| 6 | 1.373142000  | 2.043077000 | 2.104456000  |
| 9 | 0.179970000  | 2.633689000 | 2.052768000  |
| 9 | 1.195040000  | 0.725940000 | 2.245838000  |
| 9 | 1.937486000  | 2.488326000 | 3.227368000  |
| 6 | 2.666146000  | 3.794093000 | 0.849805000  |
| 9 | 3.312391000  | 4.124668000 | 1.965226000  |

|   |              |              |              |
|---|--------------|--------------|--------------|
| 9 | 3.472614000  | 4.092952000  | -0.164590000 |
| 9 | 1.580354000  | 4.573630000  | 0.762341000  |
| 6 | 3.552410000  | 1.467653000  | 1.060510000  |
| 9 | 4.005100000  | 1.628941000  | 2.308501000  |
| 9 | 3.358570000  | 0.164290000  | 0.893058000  |
| 9 | 4.539048000  | 1.859171000  | 0.258106000  |
| 6 | 3.311496000  | 1.498294000  | -2.382951000 |
| 9 | 4.126653000  | 2.513254000  | -2.099761000 |
| 9 | 3.616738000  | 0.457660000  | -1.605387000 |
| 9 | 3.567250000  | 1.121803000  | -3.637713000 |
| 6 | 1.659393000  | 3.296525000  | -2.886549000 |
| 9 | 1.926414000  | 4.308917000  | -2.050808000 |
| 9 | 2.472628000  | 3.425677000  | -3.931769000 |
| 9 | 0.412532000  | 3.460916000  | -3.328278000 |
| 6 | 0.993652000  | 0.923256000  | -3.039043000 |
| 9 | 1.163779000  | 1.166473000  | -4.342046000 |
| 9 | 1.373026000  | -0.338863000 | -2.818857000 |
| 9 | -0.313116000 | 1.004720000  | -2.805199000 |
| 6 | -1.241582000 | -0.967658000 | -0.578450000 |
| 1 | -0.864501000 | -1.919429000 | -0.192112000 |
| 1 | -2.333223000 | -1.053518000 | -0.703101000 |
| 1 | -0.791150000 | -0.793553000 | -1.553631000 |
| 6 | -1.398212000 | -0.227728000 | 1.686885000  |
| 1 | -2.469298000 | -0.484491000 | 1.668545000  |
| 1 | -0.849802000 | -1.087229000 | 2.083636000  |
| 1 | -1.252777000 | 0.617663000  | 2.358294000  |
| 1 | 1.202300000  | -0.464719000 | -0.127104000 |
| 1 | 1.763127000  | -0.628360000 | -0.586919000 |
| 6 | -0.710214000 | 3.638864000  | -0.785382000 |
| 1 | -0.000161000 | 4.411346000  | -1.044552000 |
| 6 | -2.054017000 | 3.993028000  | -0.745999000 |
| 1 | -2.341935000 | 5.011311000  | -0.984466000 |
| 6 | -2.600018000 | 1.764036000  | -0.076484000 |
| 1 | -3.334291000 | 1.017258000  | 0.211968000  |
| 6 | -3.011912000 | 3.048127000  | -0.406731000 |
| 1 | -4.065137000 | 3.308202000  | -0.386827000 |

### C<sub>6</sub>F<sub>5</sub>

E(RM062X) = -1847.15350399

|   |              |              |              |
|---|--------------|--------------|--------------|
| 7 | -1.047683000 | 0.142926000  | -0.385054000 |
| 6 | -1.410114000 | 1.508680000  | -0.090718000 |
| 6 | -0.390058000 | 2.470897000  | -0.071350000 |
| 5 | 1.119422000  | 2.142662000  | -0.415984000 |
| 6 | -1.409908000 | -0.784196000 | 0.684044000  |
| 1 | -0.995813000 | -0.423523000 | 1.629208000  |
| 1 | -2.497926000 | -0.903606000 | 0.799779000  |
| 1 | -0.981144000 | -1.766027000 | 0.462788000  |
| 6 | -1.552341000 | -0.305526000 | -1.681719000 |
| 1 | -1.068707000 | -1.248535000 | -1.952759000 |
| 1 | -2.642569000 | -0.464146000 | -1.669443000 |
| 1 | -1.326225000 | 0.446110000  | -2.438781000 |
| 6 | 2.203239000  | 2.831804000  | 0.531081000  |
| 6 | 2.062700000  | 2.764407000  | 1.917910000  |
| 6 | 3.291458000  | 3.568201000  | 0.069116000  |
| 6 | 2.937920000  | 3.379608000  | 2.800687000  |
| 6 | 4.183202000  | 4.208584000  | 0.920830000  |
| 6 | 4.003843000  | 4.111864000  | 2.293394000  |
| 6 | 1.537004000  | 1.746800000  | -1.901004000 |
| 6 | 2.752822000  | 1.111789000  | -2.153649000 |
| 6 | 0.748849000  | 2.001477000  | -3.019252000 |
| 6 | 3.170358000  | 0.736760000  | -3.419477000 |
| 6 | 1.131551000  | 1.643424000  | -4.307942000 |
| 6 | 2.348552000  | 1.010470000  | -4.507148000 |
| 9 | 2.769147000  | 3.275909000  | 4.116243000  |
| 9 | 1.064367000  | 2.049016000  | 2.446792000  |
| 9 | 4.849253000  | 4.715115000  | 3.119360000  |
| 9 | 5.202136000  | 4.911513000  | 0.433673000  |

|   |              |             |              |
|---|--------------|-------------|--------------|
| 9 | 3.515205000  | 3.704113000 | -1.241363000 |
| 9 | 3.567283000  | 0.828823000 | -1.129906000 |
| 9 | 4.336662000  | 0.124930000 | -3.606125000 |
| 9 | 2.727330000  | 0.661300000 | -5.730042000 |
| 9 | 0.338863000  | 1.901470000 | -5.345505000 |
| 9 | -0.441047000 | 2.599882000 | -2.902334000 |
| 1 | 0.804466000  | 0.414027000 | 0.048895000  |
| 1 | 1.494442000  | 0.631997000 | 0.338306000  |
| 6 | -0.742198000 | 3.789750000 | 0.242930000  |
| 1 | 0.032806000  | 4.551378000 | 0.281928000  |
| 6 | -2.060523000 | 4.148693000 | 0.503655000  |
| 1 | -2.306909000 | 5.179851000 | 0.734743000  |
| 6 | -2.729879000 | 1.858463000 | 0.191898000  |
| 1 | -3.503321000 | 1.095089000 | 0.179793000  |
| 6 | -3.058560000 | 3.179039000 | 0.479339000  |
| 1 | -4.088884000 | 3.448186000 | 0.688413000  |

### 3. FLP-H<sup>+</sup>/H<sup>-</sup>

#### H

E(RM062X) = -392.764697108

|   |              |              |              |
|---|--------------|--------------|--------------|
| 6 | -0.205282000 | -0.053538000 | -0.011453000 |
| 6 | 1.135874000  | 0.073633000  | 0.353941000  |
| 5 | 2.148000000  | -1.178122000 | 0.150755000  |
| 6 | -0.537392000 | -1.415963000 | -2.028751000 |
| 1 | 0.430850000  | -1.038322000 | -2.355745000 |
| 1 | -0.678935000 | -2.442156000 | -2.372601000 |
| 1 | -1.344041000 | -0.776485000 | -2.391243000 |
| 6 | -1.756739000 | -2.004405000 | 0.040123000  |
| 1 | -1.825591000 | -3.040888000 | -0.292976000 |
| 1 | -1.674486000 | -1.960052000 | 1.125494000  |
| 1 | -2.638857000 | -1.454301000 | -0.289182000 |
| 7 | -0.541841000 | -1.394381000 | -0.543558000 |
| 1 | 0.315252000  | -1.940427000 | -0.212797000 |
| 1 | 1.559388000  | -2.233370000 | 0.491508000  |
| 1 | 2.417116000  | -1.288957000 | -1.032834000 |
| 1 | 3.140763000  | -1.080745000 | 0.828696000  |
| 6 | 1.477520000  | 1.340742000  | 0.852932000  |
| 1 | 2.503510000  | 1.508522000  | 1.167350000  |
| 6 | 0.548621000  | 2.371792000  | 0.955498000  |
| 1 | 0.854914000  | 3.337472000  | 1.346700000  |
| 6 | -1.170409000 | 0.942457000  | 0.068726000  |
| 1 | -2.198195000 | 0.773928000  | -0.242458000 |
| 6 | -0.777498000 | 2.181177000  | 0.562928000  |
| 1 | -1.498902000 | 2.987152000  | 0.643033000  |

#### Mes'

E(RM062X) = -1090.66668076

|   |              |              |              |
|---|--------------|--------------|--------------|
| 7 | -2.636562000 | -0.706655000 | 1.014657000  |
| 6 | -2.583826000 | 0.008015000  | -0.288190000 |
| 6 | -1.332039000 | 0.060630000  | -0.903126000 |
| 5 | -0.004313000 | -0.584856000 | -0.149249000 |
| 6 | 1.249054000  | -0.761414000 | -1.172311000 |
| 6 | 0.963960000  | -1.417383000 | -2.383440000 |
| 6 | 2.593856000  | -0.388346000 | -0.972947000 |
| 6 | 1.898259000  | -1.683281000 | -3.379690000 |
| 6 | 3.538997000  | -0.649324000 | -1.973985000 |
| 6 | 3.225392000  | -1.278385000 | -3.173262000 |
| 6 | 0.197344000  | 0.229863000  | 1.263887000  |
| 6 | 0.213931000  | -0.478136000 | 2.477488000  |
| 6 | 0.244988000  | 1.637077000  | 1.364366000  |
| 6 | 0.249676000  | 0.121092000  | 3.739290000  |
| 6 | 0.278362000  | 2.246216000  | 2.621877000  |
| 6 | 0.269933000  | 1.520748000  | 3.813917000  |
| 6 | 3.097737000  | 0.261910000  | 0.297069000  |
| 1 | 2.714212000  | 1.278620000  | 0.425839000  |
| 1 | 2.796914000  | -0.299260000 | 1.184872000  |

|   |              |              |              |   |              |              |              |
|---|--------------|--------------|--------------|---|--------------|--------------|--------------|
| 1 | 4.189637000  | 0.319710000  | 0.283181000  | 6 | -3.137338000 | 0.495680000  | 2.061575000  |
| 6 | 4.282341000  | -1.532262000 | -4.216355000 | 1 | -4.165150000 | 0.807525000  | 1.876323000  |
| 1 | 4.385436000  | -2.601664000 | -4.432982000 | 1 | -3.081038000 | -0.104073000 | 2.971267000  |
| 1 | 4.038231000  | -1.040188000 | -5.164848000 | 1 | -2.475185000 | 1.357052000  | 2.148842000  |
| 1 | 5.255412000  | -1.161088000 | -3.886575000 | 6 | -1.150402000 | 1.018647000  | -2.176801000 |
| 6 | 0.275112000  | 2.511457000  | 0.132704000  | 1 | -0.193926000 | 0.992826000  | -2.694744000 |
| 1 | -0.734728000 | 2.727118000  | -0.234908000 | 6 | -2.224994000 | 1.697829000  | -2.740829000 |
| 1 | 0.764824000  | 3.465802000  | 0.346794000  | 1 | -2.103904000 | 2.204767000  | -3.693367000 |
| 1 | 0.813181000  | 2.018840000  | -0.682818000 | 6 | -3.613585000 | 1.073843000  | -0.881283000 |
| 6 | 0.307155000  | 2.222625000  | 5.146734000  | 1 | -4.572923000 | 1.078196000  | -0.369612000 |
| 1 | -0.555478000 | 1.957067000  | 5.768387000  | 6 | -3.461161000 | 1.735943000  | -2.093675000 |
| 1 | 1.202366000  | 1.949970000  | 5.716556000  | 1 | -4.299426000 | 2.267178000  | -2.530996000 |
| 1 | 0.308684000  | 3.307286000  | 5.019124000  | 1 | 4.512874000  | -0.115527000 | -1.882102000 |
| 6 | -3.481895000 | -1.926996000 | 0.959822000  | 1 | 0.108110000  | 3.044845000  | 3.180247000  |
| 1 | -3.402190000 | -2.454589000 | 1.911396000  | 1 | -0.553285000 | -1.560745000 | 0.038917000  |
| 1 | -4.516603000 | -1.639436000 | 0.774287000  | 1 | -1.688324000 | -0.618395000 | 1.145461000  |
| 1 | -3.112825000 | -2.550225000 | 0.145746000  | 1 | 1.809051000  | -2.647168000 | -4.001657000 |
| 6 | -2.972184000 | 0.184186000  | 2.159607000  | 1 | 0.868443000  | -0.951243000 | 4.485324000  |
| 1 | -3.997675000 | 0.535221000  | 2.039098000  | 6 | 0.599467000  | 1.591257000  | 5.430066000  |
| 1 | -2.865380000 | -0.382767000 | 3.085618000  | 1 | 0.286566000  | 0.828230000  | 6.147734000  |
| 1 | -2.268844000 | 1.018188000  | 2.153821000  | 1 | 1.640971000  | 1.844152000  | 5.655037000  |
| 6 | -1.335616000 | 0.731020000  | -2.138876000 | 1 | 0.000452000  | 2.489432000  | 5.601711000  |
| 1 | -0.395945000 | 0.809161000  | -2.679189000 | 6 | 0.808151000  | -2.170505000 | 2.116970000  |
| 6 | -2.485076000 | 1.293526000  | -2.683927000 | 1 | 1.297911000  | -2.629477000 | 2.979610000  |
| 1 | -2.432600000 | 1.805729000  | -3.639883000 | 1 | -0.112460000 | -2.730359000 | 1.913965000  |
| 6 | -3.760294000 | 0.553296000  | -0.791045000 | 1 | 1.445039000  | -2.299682000 | 1.237402000  |
| 1 | -4.700296000 | 0.474248000  | -0.250141000 | 6 | -0.118884000 | 2.620990000  | 0.588430000  |
| 6 | -3.705500000 | 1.211130000  | -2.012901000 | 1 | 0.380899000  | 2.373334000  | -0.349998000 |
| 1 | -4.602433000 | 1.651196000  | -2.434914000 | 1 | -1.179589000 | 2.763900000  | 0.347126000  |
| 1 | 4.572410000  | -0.350911000 | -1.802357000 | 1 | 0.271358000  | 3.578573000  | 0.944300000  |
| 1 | 0.318665000  | 3.333715000  | 2.676710000  | 6 | 2.942708000  | 0.684057000  | 0.062150000  |
| 1 | 0.206647000  | -1.569307000 | 2.431806000  | 1 | 2.329478000  | 1.586322000  | 0.113890000  |
| 6 | 0.268944000  | -0.715573000 | 4.992926000  | 1 | 2.857414000  | 0.192522000  | 1.035379000  |
| 1 | -0.585254000 | -0.493294000 | 5.643531000  | 1 | 3.982331000  | 0.996087000  | -0.068353000 |
| 1 | 0.244816000  | -1.781053000 | 4.752871000  | 6 | 4.362046000  | -1.703447000 | -4.090552000 |
| 1 | 1.170895000  | -0.527311000 | 5.585591000  | 1 | 4.352142000  | -2.759336000 | -4.375868000 |
| 1 | -0.061857000 | -1.745244000 | -2.557364000 | 1 | 4.218261000  | -1.117995000 | -5.005238000 |
| 6 | 1.500117000  | -2.393046000 | -4.648224000 | 1 | 5.354572000  | -1.466177000 | -3.699306000 |
| 1 | 0.433343000  | -2.628760000 | -4.645236000 | 6 | -0.315443000 | -2.375137000 | -2.458066000 |
| 1 | 1.708032000  | -1.782668000 | -5.534603000 | 1 | -0.300506000 | -2.979128000 | -3.368976000 |
| 1 | 2.052059000  | -3.331489000 | -4.775200000 | 1 | -0.524707000 | -3.039135000 | -1.612195000 |
| 1 | -0.356213000 | -1.732151000 | 0.184242000  | 1 | -1.153696000 | -1.675868000 | -2.529291000 |
| 1 | -1.658192000 | -1.027647000 | 1.142883000  |   |              |              |              |

#### FMes

E(RM062X) = -2877.12405481

|   |              |              |              |   |              |              |              |
|---|--------------|--------------|--------------|---|--------------|--------------|--------------|
| 7 | -3.864848000 | -0.238520000 | -0.206200000 | 7 | -3.864848000 | -0.238520000 | -0.206200000 |
| 6 | -3.330339000 | 0.617708000  | -1.307529000 | 6 | -3.330339000 | 0.617708000  | -1.307529000 |
| 6 | -1.948793000 | 0.821436000  | -1.360964000 | 6 | -1.948793000 | 0.821436000  | -1.360964000 |
| 5 | -0.883047000 | -0.030160000 | -0.430126000 | 5 | -0.883047000 | -0.030160000 | -0.430126000 |
| 6 | 0.430016000  | -0.402199000 | -1.378341000 | 6 | 0.430016000  | -0.402199000 | -1.378341000 |
| 6 | 0.432839000  | -1.561335000 | -2.195070000 | 6 | 0.432839000  | -1.561335000 | -2.195070000 |
| 6 | 1.631709000  | 0.339057000  | -1.428590000 | 6 | 1.631709000  | 0.339057000  | -1.428590000 |
| 6 | 1.555486000  | -2.002314000 | -2.886815000 | 6 | 1.555486000  | -2.002314000 | -2.886815000 |
| 6 | 2.764223000  | -0.090297000 | -2.121867000 | 6 | 2.764223000  | -0.090297000 | -2.121867000 |
| 6 | 2.737100000  | -1.279389000 | -2.824155000 | 6 | 2.737100000  | -1.279389000 | -2.824155000 |
| 6 | -0.368306000 | 0.457171000  | 1.084625000  | 6 | -0.368306000 | 0.457171000  | 1.084625000  |
| 6 | 0.522927000  | -0.372062000 | 1.818260000  | 6 | 0.522927000  | -0.372062000 | 1.818260000  |
| 6 | -0.688756000 | 1.666862000  | 1.752667000  | 6 | -0.688756000 | 1.666862000  | 1.752667000  |
| 6 | 1.113124000  | 0.022897000  | 3.019382000  | 6 | 1.113124000  | 0.022897000  | 3.019382000  |
| 6 | -0.105143000 | 2.068471000  | 2.950478000  | 6 | -0.105143000 | 2.068471000  | 2.950478000  |
| 6 | 0.825291000  | 1.255489000  | 3.572573000  | 6 | 0.825291000  | 1.255489000  | 3.572573000  |
| 6 | 1.831026000  | 1.656585000  | -0.711114000 | 6 | 1.831026000  | 1.656585000  | -0.711114000 |
| 6 | 3.967668000  | -1.792925000 | -3.512333000 | 6 | 3.967668000  | -1.792925000 | -3.512333000 |
| 6 | -1.782159000 | 2.580780000  | 1.259003000  | 6 | -1.782159000 | 2.580780000  | 1.259003000  |
| 6 | 1.504346000  | 1.717918000  | 4.827968000  | 6 | 1.504346000  | 1.717918000  | 4.827968000  |
| 6 | -4.109678000 | -1.645638000 | -0.651579000 | 6 | -4.109678000 | -1.645638000 | -0.651579000 |
| 1 | -4.529665000 | -2.205394000 | 0.185586000  | 1 | -4.529665000 | -2.205394000 | 0.185586000  |

#### Mes

E(RM062X) = -1090.66061860

|   |              |              |              |
|---|--------------|--------------|--------------|
| 7 | -2.660503000 | -0.332677000 | 0.923207000  |
| 6 | -2.508958000 | 0.412472000  | -0.356091000 |
| 6 | -1.245075000 | 0.353031000  | -0.943983000 |
| 5 | -0.029679000 | -0.465865000 | -0.194471000 |
| 6 | 1.226973000  | -0.772324000 | -1.186078000 |
| 6 | 1.007877000  | -1.666319000 | -2.267823000 |
| 6 | 2.527962000  | -0.232174000 | -1.069664000 |
| 6 | 2.017875000  | -1.957974000 | -3.184513000 |
| 6 | 3.522015000  | -0.550300000 | -2.003145000 |
| 6 | 3.289211000  | -1.401285000 | -3.075694000 |
| 6 | 0.238122000  | 0.177672000  | 1.305920000  |
| 6 | 0.539649000  | -0.703736000 | 2.375249000  |
| 6 | 0.102289000  | 1.548953000  | 1.637025000  |
| 6 | 0.634290000  | -0.243133000 | 3.691600000  |
| 6 | 0.208126000  | 1.981821000  | 2.963137000  |
| 6 | 0.458321000  | 1.100231000  | 4.011766000  |
| 6 | -3.446997000 | -1.580553000 | 0.736439000  |
| 1 | -3.451465000 | -2.141790000 | 1.672239000  |
| 1 | -4.463964000 | -1.315765000 | 0.445522000  |
| 1 | -2.962746000 | -2.156081000 | -0.052853000 |

|   |              |              |              |
|---|--------------|--------------|--------------|
| 1 | -4.815691000 | -1.610459000 | -1.481315000 |
| 1 | -3.168090000 | -2.080047000 | -0.973547000 |
| 6 | -5.087603000 | 0.306648000  | 0.456655000  |
| 1 | -5.949490000 | 0.089110000  | -0.172687000 |
| 1 | -5.205955000 | -0.193356000 | 1.418308000  |
| 1 | -4.974436000 | 1.377804000  | 0.591181000  |
| 6 | -1.540420000 | 1.619509000  | -2.443457000 |
| 1 | -0.481838000 | 1.818745000  | -2.565760000 |
| 6 | -2.426678000 | 2.158234000  | -3.367838000 |
| 1 | -2.049109000 | 2.769324000  | -4.181370000 |
| 6 | -4.252642000 | 1.120487000  | -2.218598000 |
| 1 | -5.313822000 | 0.909463000  | -2.124558000 |
| 6 | -3.792259000 | 1.907284000  | -3.265013000 |
| 1 | -4.490786000 | 2.314019000  | -3.987783000 |
| 1 | 3.664605000  | 0.512445000  | -2.118187000 |
| 1 | -0.384844000 | 3.009596000  | 3.407016000  |
| 1 | -1.449512000 | -1.077273000 | -0.206833000 |
| 1 | -3.100155000 | -0.261510000 | 0.479938000  |
| 6 | -0.816795000 | -2.384696000 | -2.424804000 |
| 1 | 1.509974000  | -2.900954000 | -3.489440000 |
| 1 | 1.801043000  | -0.640634000 | 3.528138000  |
| 6 | 1.014525000  | -1.740087000 | 1.367636000  |
| 9 | -1.870134000 | -1.616408000 | -2.762457000 |
| 9 | -1.204188000 | -3.122244000 | -1.368527000 |
| 9 | -0.657395000 | -3.255604000 | -3.435779000 |
| 9 | 3.662658000  | -2.437396000 | -4.649026000 |
| 9 | 4.814488000  | -0.800821000 | -3.820949000 |
| 9 | 4.640400000  | -2.660507000 | -2.742227000 |
| 9 | 2.277249000  | 1.505339000  | 0.545546000  |
| 9 | 0.713879000  | 2.394594000  | -0.655048000 |
| 9 | 2.746466000  | 2.413900000  | -1.343145000 |
| 9 | 0.113434000  | -2.468150000 | 0.706841000  |
| 9 | 2.108246000  | -1.648632000 | 0.592997000  |
| 9 | 1.376121000  | -2.485915000 | 2.431267000  |
| 9 | 1.973375000  | 0.689013000  | 5.546962000  |
| 9 | 0.664054000  | 2.412980000  | 5.611063000  |
| 9 | 2.543070000  | 2.522978000  | 4.563324000  |
| 9 | -2.027703000 | 3.591924000  | 2.105694000  |
| 9 | -1.586383000 | 3.131115000  | 0.065858000  |
| 9 | -2.955670000 | 1.885118000  | 1.188903000  |

**CF<sub>3</sub>**

E(RM062X) = -1066.91747888

|   |              |              |              |
|---|--------------|--------------|--------------|
| 7 | -1.374304000 | -1.727288000 | 0.926286000  |
| 6 | -1.796792000 | -0.396901000 | 0.412156000  |
| 6 | -0.836920000 | 0.342700000  | -0.274674000 |
| 5 | 0.656566000  | -0.242975000 | -0.543470000 |
| 1 | 0.592101000  | -1.384801000 | -0.973359000 |
| 1 | -0.397800000 | -1.840221000 | 0.612520000  |
| 6 | -1.343587000 | -1.765026000 | 2.417352000  |
| 1 | -2.363821000 | -1.671139000 | 2.788562000  |
| 1 | -0.902769000 | -2.710408000 | 2.734546000  |
| 1 | -0.728455000 | -0.932113000 | 2.753570000  |
| 6 | -2.149850000 | -2.849528000 | 0.331470000  |
| 1 | -3.192787000 | -2.761213000 | 0.633554000  |
| 1 | -2.065784000 | -2.776570000 | -0.752303000 |
| 1 | -1.733260000 | -3.792783000 | 0.686415000  |
| 6 | 1.502497000  | -0.312354000 | 0.851766000  |
| 9 | 2.829662000  | -0.190304000 | 0.727771000  |
| 9 | 1.120037000  | 0.590210000  | 1.791293000  |
| 9 | 1.320528000  | -1.537780000 | 1.495816000  |
| 6 | 1.459518000  | 0.637330000  | -1.626031000 |
| 9 | 1.742785000  | 1.896678000  | -1.186214000 |
| 9 | 2.643501000  | 0.102576000  | -1.989038000 |
| 9 | 0.760897000  | 0.812018000  | -2.778832000 |
| 6 | -1.276075000 | 1.603050000  | -0.714587000 |
| 1 | -0.580357000 | 2.236415000  | -1.253137000 |

|   |              |              |              |
|---|--------------|--------------|--------------|
| 6 | -2.569717000 | 2.057388000  | -0.483906000 |
| 1 | -2.866431000 | 3.037491000  | -0.843357000 |
| 6 | -3.099627000 | 0.018178000  | 0.666169000  |
| 1 | -3.800212000 | -0.607314000 | 1.213207000  |
| 6 | -3.489193000 | 1.268642000  | 0.206012000  |
| 1 | -4.497765000 | 1.623242000  | 0.387753000  |

**PFtB**

E(RM062X) = -2493.68458741

|   |              |              |              |
|---|--------------|--------------|--------------|
| 7 | -2.352373000 | -2.102060000 | 0.909028000  |
| 6 | -2.731899000 | -0.711988000 | 0.531970000  |
| 6 | -1.721712000 | 0.186885000  | 0.169460000  |
| 5 | -0.141896000 | -0.256639000 | 0.038254000  |
| 6 | 0.793387000  | 0.321021000  | 1.405574000  |
| 6 | 0.367530000  | -0.103995000 | -1.605238000 |
| 6 | -0.117218000 | 0.175494000  | 2.649455000  |
| 9 | -1.185357000 | 0.974138000  | 2.616679000  |
| 9 | -0.581530000 | -1.104616000 | 2.724699000  |
| 9 | 0.467040000  | 0.408092000  | 3.823507000  |
| 6 | 1.253197000  | 1.787180000  | 1.375593000  |
| 9 | 1.802493000  | 2.166709000  | 2.541999000  |
| 9 | 2.163651000  | 2.015118000  | 0.434437000  |
| 9 | 0.217484000  | 2.611127000  | 1.158349000  |
| 6 | 2.042438000  | -0.558912000 | 1.690241000  |
| 9 | 2.566425000  | -0.353391000 | 2.908900000  |
| 9 | 1.738481000  | -1.863214000 | 1.630141000  |
| 9 | 3.032145000  | -0.321341000 | 0.834253000  |
| 6 | 1.826757000  | -0.553648000 | -1.818324000 |
| 9 | 2.671301000  | 0.434374000  | -1.519010000 |
| 9 | 2.119242000  | -1.621603000 | -1.069002000 |
| 9 | 2.086782000  | -0.912349000 | -3.085851000 |
| 6 | 0.207655000  | 1.276251000  | -2.268511000 |
| 9 | 0.511399000  | 2.277728000  | -1.437010000 |
| 9 | 0.980100000  | 1.423819000  | -3.351782000 |
| 9 | -1.058952000 | 1.471164000  | -2.671954000 |
| 6 | -0.480559000 | -1.077120000 | -2.454319000 |
| 9 | -0.328998000 | -0.890908000 | -3.768968000 |
| 9 | -0.146972000 | -2.355720000 | -2.192631000 |
| 9 | -1.800183000 | -0.981664000 | -2.221872000 |
| 6 | -2.661771000 | -3.103124000 | -0.154243000 |
| 1 | -2.381772000 | -4.092766000 | 0.209333000  |
| 1 | -3.731333000 | -3.061742000 | -0.360599000 |
| 1 | -2.096302000 | -2.848825000 | -1.046157000 |
| 6 | -2.913642000 | -2.529088000 | 2.224208000  |
| 1 | -3.966321000 | -2.777122000 | 2.093834000  |
| 1 | -2.366231000 | -3.410029000 | 2.560948000  |
| 1 | -2.797047000 | -1.714520000 | 2.933608000  |
| 1 | -1.323682000 | -2.054292000 | 0.991153000  |
| 1 | -0.057397000 | -1.459042000 | 0.168791000  |
| 6 | -2.189474000 | 1.484287000  | -0.106005000 |
| 1 | -1.472336000 | 2.252693000  | -0.360757000 |
| 6 | -3.533544000 | 1.830031000  | -0.060504000 |
| 1 | -3.831294000 | 2.848519000  | -0.286959000 |
| 6 | -4.089326000 | -0.408272000 | 0.573859000  |
| 1 | -4.824418000 | -1.160558000 | 0.845407000  |
| 6 | -4.497342000 | 0.881164000  | 0.268815000  |
| 1 | -5.549829000 | 1.140520000  | 0.297046000  |

**C<sub>6</sub>F<sub>5</sub>**

E(RM062X) = -1847.19721785

|   |              |              |              |
|---|--------------|--------------|--------------|
| 7 | -2.678294000 | -1.840709000 | 1.208771000  |
| 6 | -2.879183000 | -0.458390000 | 0.707359000  |
| 6 | -1.800067000 | 0.106999000  | 0.033966000  |
| 5 | -0.360765000 | -0.657732000 | -0.108453000 |
| 6 | -2.980184000 | -2.021379000 | 2.651091000  |
| 1 | -2.443316000 | -1.256489000 | 3.209590000  |
| 1 | -4.053995000 | -1.924656000 | 2.809808000  |

|   |              |              |              |
|---|--------------|--------------|--------------|
| 1 | -2.642722000 | -3.012267000 | 2.955616000  |
| 6 | -3.360562000 | -2.833296000 | 0.331938000  |
| 1 | -3.118139000 | -3.839682000 | 0.676326000  |
| 1 | -4.435987000 | -2.660036000 | 0.379276000  |
| 1 | -2.996925000 | -2.671765000 | -0.683598000 |
| 6 | 0.545286000  | -0.120174000 | 1.135324000  |
| 6 | 0.628312000  | -0.821485000 | 2.329659000  |
| 6 | 1.162589000  | 1.126773000  | 1.150789000  |
| 6 | 1.309613000  | -0.370367000 | 3.453307000  |
| 6 | 1.865112000  | 1.620690000  | 2.240685000  |
| 6 | 1.941686000  | 0.862263000  | 3.402645000  |
| 6 | 0.241644000  | -0.498613000 | -1.607399000 |
| 6 | 1.553181000  | -0.194019000 | -1.955767000 |
| 6 | -0.595916000 | -0.775187000 | -2.686178000 |
| 6 | 1.995177000  | -0.115714000 | -3.273092000 |
| 6 | -0.200841000 | -0.712437000 | -4.014165000 |
| 6 | 1.111824000  | -0.371905000 | -4.309980000 |
| 9 | 1.347270000  | -1.098532000 | 4.571419000  |
| 9 | -0.014554000 | -2.012077000 | 2.468562000  |
| 9 | 2.600815000  | 1.323526000  | 4.463322000  |
| 9 | 2.449487000  | 2.816973000  | 2.196134000  |
| 9 | 1.082678000  | 1.920927000  | 0.073188000  |
| 9 | 2.483749000  | 0.019082000  | -1.015567000 |
| 9 | 3.263978000  | 0.189825000  | -3.546203000 |
| 9 | 1.520136000  | -0.306496000 | -5.575937000 |
| 9 | -1.057478000 | -0.986455000 | -5.000224000 |
| 9 | -1.871171000 | -1.154600000 | -2.460746000 |
| 1 | -1.657728000 | -1.991761000 | 1.066908000  |
| 1 | -0.498340000 | -1.869722000 | 0.033358000  |
| 6 | -2.021877000 | 1.404889000  | -0.453327000 |
| 1 | -1.211515000 | 1.902780000  | -0.978202000 |
| 6 | -3.235874000 | 2.059229000  | -0.282012000 |
| 1 | -3.368567000 | 3.062205000  | -0.675002000 |
| 6 | -4.114727000 | 0.154101000  | 0.891133000  |
| 1 | -4.926964000 | -0.347695000 | 1.410291000  |
| 6 | -4.289427000 | 1.436631000  | 0.388988000  |
| 1 | -5.238443000 | 1.944804000  | 0.519435000  |

#### 4. FLP-H<sup>+</sup>/H<sup>-</sup> + CO2 (TS)

**H**  
E(RM062X) = -581.329561120

|   |              |              |              |
|---|--------------|--------------|--------------|
| 6 | -1.271530000 | 1.645108000  | 0.674664000  |
| 6 | 0.079992000  | 1.830781000  | 0.981503000  |
| 5 | 1.233439000  | 0.729497000  | 0.754548000  |
| 8 | 1.693080000  | -2.112693000 | 2.052522000  |
| 6 | 0.735876000  | -1.538438000 | 1.657755000  |
| 8 | -0.416712000 | -1.675712000 | 1.264488000  |
| 6 | -1.581091000 | 0.283872000  | -1.343294000 |
| 1 | -0.580047000 | 0.599768000  | -1.631781000 |
| 1 | -1.765902000 | -0.737680000 | -1.679487000 |
| 1 | -2.329899000 | 0.965190000  | -1.750964000 |
| 6 | -2.969862000 | -0.190804000 | 0.630626000  |
| 1 | -3.027709000 | -1.249081000 | 0.374801000  |
| 1 | -3.001415000 | -0.072242000 | 1.712693000  |
| 1 | -3.789368000 | 0.353419000  | 0.161341000  |
| 7 | -1.663478000 | 0.319513000  | 0.141495000  |
| 1 | -0.977630000 | -0.401033000 | 0.527932000  |
| 1 | 1.006112000  | -0.165806000 | 1.710907000  |
| 1 | 1.159402000  | 0.119493000  | -0.286272000 |
| 1 | 2.336242000  | 1.102519000  | 1.041746000  |
| 6 | 0.405159000  | 3.104378000  | 1.473916000  |
| 1 | 1.440888000  | 3.297530000  | 1.736055000  |
| 6 | -0.541886000 | 4.112223000  | 1.627885000  |
| 1 | -0.243708000 | 5.082581000  | 2.011983000  |
| 6 | -2.244160000 | 2.630128000  | 0.803389000  |

|   |              |             |             |
|---|--------------|-------------|-------------|
| 1 | -3.279960000 | 2.440021000 | 0.540077000 |
| 6 | -1.871626000 | 3.879278000 | 1.288561000 |
| 1 | -2.617252000 | 4.658773000 | 1.401811000 |

#### Mes'

E(RM062X) = -1279.23019274

|   |              |              |              |
|---|--------------|--------------|--------------|
| 7 | -1.181653000 | 1.513919000  | 1.071874000  |
| 6 | -0.942199000 | 2.167130000  | -0.239640000 |
| 6 | 0.327033000  | 2.121658000  | -0.838490000 |
| 5 | 1.719979000  | 1.680233000  | -0.113665000 |
| 6 | 2.954906000  | 1.360775000  | -1.068594000 |
| 6 | 2.686027000  | 0.532844000  | -2.174451000 |
| 6 | 4.295614000  | 1.758912000  | -0.876196000 |
| 6 | 3.648820000  | 0.113285000  | -3.085285000 |
| 6 | 5.259941000  | 1.353245000  | -1.804289000 |
| 6 | 4.970268000  | 0.546500000  | -2.900776000 |
| 6 | 1.871998000  | 2.365604000  | 1.330142000  |
| 6 | 1.952078000  | 1.625148000  | 2.517335000  |
| 6 | 1.874971000  | 3.772867000  | 1.444795000  |
| 6 | 2.013154000  | 2.210276000  | 3.784154000  |
| 6 | 1.948474000  | 4.358922000  | 2.709786000  |
| 6 | 2.006540000  | 3.608666000  | 3.884469000  |
| 6 | 4.764867000  | 2.593174000  | 0.294326000  |
| 1 | 4.519876000  | 2.122246000  | 1.249479000  |
| 1 | 5.848507000  | 2.726408000  | 0.247904000  |
| 1 | 4.308741000  | 3.587072000  | 0.307905000  |
| 6 | 6.054762000  | 0.131252000  | -3.859143000 |
| 1 | 6.158501000  | -0.958810000 | -3.892737000 |
| 1 | 5.832698000  | 0.460060000  | -4.880410000 |
| 1 | 7.019169000  | 0.553974000  | -3.569761000 |
| 6 | 1.796912000  | 4.671928000  | 0.231660000  |
| 1 | 0.761837000  | 4.803503000  | -0.105891000 |
| 1 | 2.203794000  | 5.661093000  | 0.457719000  |
| 1 | 2.355691000  | 4.258210000  | -0.613915000 |
| 6 | 2.079058000  | 4.285341000  | 5.228252000  |
| 1 | 1.240938000  | 3.993755000  | 5.870811000  |
| 1 | 2.995807000  | 4.012010000  | 5.761805000  |
| 1 | 2.061922000  | 5.372138000  | 5.122933000  |
| 6 | -2.360652000 | 0.597917000  | 1.050383000  |
| 1 | -2.338709000 | 0.013250000  | 1.969585000  |
| 1 | -3.283043000 | 1.173648000  | 0.985304000  |
| 1 | -2.257001000 | -0.070830000 | 0.198194000  |
| 6 | -1.288605000 | 2.483730000  | 2.197798000  |
| 1 | -2.212431000 | 3.053554000  | 2.079424000  |
| 1 | -1.307955000 | 1.919342000  | 3.131540000  |
| 1 | -0.425096000 | 3.146658000  | 2.183721000  |
| 6 | 0.400809000  | 2.728359000  | -2.105780000 |
| 1 | 1.358879000  | 2.718383000  | -2.615861000 |
| 6 | -0.678959000 | 3.360107000  | -2.711662000 |
| 1 | -0.558846000 | 3.818847000  | -3.687760000 |
| 6 | -2.035749000 | 2.809116000  | -0.816145000 |
| 1 | -2.993240000 | 2.838868000  | -0.305366000 |
| 6 | -1.905183000 | 3.416021000  | -2.058390000 |
| 1 | -2.755362000 | 3.916812000  | -2.508744000 |
| 1 | 6.289619000  | 1.673822000  | -1.656539000 |
| 1 | 1.962557000  | 5.445420000  | 2.783779000  |
| 1 | 1.949829000  | 0.539718000  | 2.464678000  |
| 6 | 2.091105000  | 1.352226000  | 5.020280000  |
| 1 | 1.261710000  | 1.558056000  | 5.706421000  |
| 1 | 2.061762000  | 0.291922000  | 4.762113000  |
| 1 | 3.015404000  | 1.539422000  | 5.577812000  |
| 1 | 1.666758000  | 0.176435000  | -2.316555000 |
| 6 | 3.286619000  | -0.792539000 | -4.232627000 |
| 1 | 2.221542000  | -1.032052000 | -4.217729000 |
| 1 | 3.520120000  | -0.332673000 | -5.199599000 |
| 1 | 3.841864000  | -1.735583000 | -4.184976000 |
| 8 | 0.112629000  | -0.696418000 | 1.346082000  |



|   |              |              |              |   |             |              |              |
|---|--------------|--------------|--------------|---|-------------|--------------|--------------|
| 6 | 0.979479000  | -0.812241000 | 0.458820000  | 1 | 4.257511000 | 0.516324000  | 2.706268000  |
| 8 | 1.444842000  | -1.667473000 | -0.239814000 | 1 | 2.759631000 | -0.408765000 | 2.639080000  |
| 1 | 1.503057000  | 0.296525000  | 0.254044000  | 1 | 3.493188000 | 0.206306000  | 1.147618000  |
| 1 | -0.400503000 | 0.804160000  | 1.271849000  | 1 | 3.550093000 | -0.651511000 | -3.792829000 |
|   |              |              |              | 1 | 3.087005000 | 1.747862000  | 4.449211000  |

**Mes**

E(RM062X) = -1279.22009947

|   |              |              |              |
|---|--------------|--------------|--------------|
| 7 | -1.231755000 | 1.288828000  | 1.114435000  |
| 6 | -1.057631000 | 2.001292000  | -0.174528000 |
| 6 | 0.200154000  | 2.078389000  | -0.784650000 |
| 5 | 1.637376000  | 1.703986000  | -0.120954000 |
| 6 | 2.829636000  | 1.396387000  | -1.146807000 |
| 6 | 2.655526000  | 0.433738000  | -2.173588000 |
| 6 | 4.099921000  | 2.028384000  | -1.060621000 |
| 6 | 3.713540000  | 0.102796000  | -3.025064000 |
| 6 | 5.122165000  | 1.682012000  | -1.942739000 |
| 6 | 4.958026000  | 0.707876000  | -2.924715000 |
| 6 | 1.869653000  | 2.399278000  | 1.320720000  |
| 6 | 2.533205000  | 1.732638000  | 2.378506000  |
| 6 | 1.425868000  | 3.723702000  | 1.578764000  |
| 6 | 2.589236000  | 2.301185000  | 3.654078000  |
| 6 | 1.527068000  | 4.271756000  | 2.859849000  |
| 6 | 2.069209000  | 3.560581000  | 3.927450000  |
| 6 | 4.429109000  | 3.110214000  | -0.053524000 |
| 1 | 4.534494000  | 2.710051000  | 0.958911000  |
| 1 | 5.373036000  | 3.589968000  | -0.323437000 |
| 1 | 3.660265000  | 3.884283000  | -0.006182000 |
| 6 | 6.097585000  | 0.319031000  | -3.829850000 |
| 1 | 5.733861000  | -0.157655000 | -4.743210000 |
| 1 | 6.695096000  | 1.190430000  | -4.110999000 |
| 1 | 6.766509000  | -0.389297000 | -3.329865000 |
| 6 | 0.898857000  | 4.650268000  | 0.498955000  |
| 1 | -0.163541000 | 4.496488000  | 0.277342000  |
| 1 | 1.022529000  | 5.688524000  | 0.816964000  |
| 1 | 1.439459000  | 4.523773000  | -0.442358000 |
| 6 | 2.167979000  | 4.162741000  | 5.305369000  |
| 1 | 1.907154000  | 3.431637000  | 6.075395000  |
| 1 | 3.188088000  | 4.502732000  | 5.511387000  |
| 1 | 1.503594000  | 5.023666000  | 5.411041000  |
| 6 | -2.247604000 | 0.199134000  | 1.016146000  |
| 1 | -2.174307000 | -0.405269000 | 1.919380000  |
| 1 | -3.244032000 | 0.628210000  | 0.914102000  |
| 1 | -2.004985000 | -0.415230000 | 0.150264000  |
| 6 | -1.529089000 | 2.190709000  | 2.260584000  |
| 1 | -2.497219000 | 2.668077000  | 2.099900000  |
| 1 | -1.552440000 | 1.583799000  | 3.167087000  |
| 1 | -0.737565000 | 2.934958000  | 2.335616000  |
| 6 | 0.211305000  | 2.707971000  | -2.043056000 |
| 1 | 1.163338000  | 2.774733000  | -2.563234000 |
| 6 | -0.920807000 | 3.266993000  | -2.620996000 |
| 1 | -0.852015000 | 3.753586000  | -3.588560000 |
| 6 | -2.208605000 | 2.562444000  | -0.726067000 |
| 1 | -3.160343000 | 2.496847000  | -0.206818000 |
| 6 | -2.140354000 | 3.210779000  | -1.951794000 |
| 1 | -3.032853000 | 3.652276000  | -2.381752000 |
| 1 | 6.081397000  | 2.189401000  | -1.859461000 |
| 1 | 1.185232000  | 5.292486000  | 3.023514000  |
| 8 | 0.364606000  | -0.656212000 | 1.690404000  |
| 6 | 1.172554000  | -0.790161000 | 0.751600000  |
| 8 | 1.788898000  | -1.664982000 | 0.210701000  |
| 1 | 1.395551000  | 0.325356000  | 0.250279000  |
| 1 | -0.356634000 | 0.722071000  | 1.373072000  |
| 6 | 1.348825000  | -0.270614000 | -2.480408000 |
| 1 | 0.871081000  | 0.191299000  | -3.352747000 |
| 1 | 1.541271000  | -1.319832000 | -2.715724000 |
| 1 | 0.626306000  | -0.246946000 | -1.669289000 |
| 6 | 3.293292000  | 0.437272000  | 2.195192000  |

**FMes**

E(RM062X) = -3065.65162653

|   |              |              |              |
|---|--------------|--------------|--------------|
| 7 | -1.200210000 | 1.226169000  | 1.017854000  |
| 6 | -0.999282000 | 2.030433000  | -0.199188000 |
| 6 | 0.276565000  | 2.240863000  | -0.750076000 |
| 5 | 1.716085000  | 1.907686000  | -0.124484000 |
| 6 | 2.856712000  | 1.483857000  | -1.199513000 |
| 6 | 2.616957000  | 0.458339000  | -2.149619000 |
| 6 | 4.166688000  | 2.029398000  | -1.221835000 |
| 6 | 3.620687000  | 0.005234000  | -3.011969000 |
| 6 | 5.157520000  | 1.579034000  | -2.084410000 |
| 6 | 4.885700000  | 0.553466000  | -2.974485000 |
| 6 | 1.990500000  | 2.536868000  | 1.363354000  |
| 6 | 2.639919000  | 1.842271000  | 2.410143000  |
| 6 | 1.458483000  | 3.799648000  | 1.747837000  |
| 6 | 2.590243000  | 2.257543000  | 3.740922000  |
| 6 | 1.439169000  | 4.231733000  | 3.072667000  |
| 6 | 1.953919000  | 3.434336000  | 4.080744000  |
| 6 | 4.610302000  | 3.149276000  | -0.301780000 |
| 6 | 5.949851000  | 0.100307000  | -3.934857000 |
| 6 | 0.854939000  | 4.833871000  | 0.805752000  |
| 6 | 1.820427000  | 3.856034000  | 5.516943000  |
| 6 | -2.215766000 | 0.158414000  | 0.808286000  |
| 1 | -2.169996000 | -0.520372000 | 1.661198000  |
| 1 | -3.221302000 | 0.574644000  | 0.723897000  |
| 1 | -1.958961000 | -0.388292000 | -0.099218000 |
| 6 | -1.555793000 | 2.044549000  | 2.198967000  |
| 1 | -2.531012000 | 2.519406000  | 2.054353000  |
| 1 | -1.589927000 | 1.390082000  | 3.072934000  |
| 1 | -0.800735000 | 2.813385000  | 2.346079000  |
| 6 | 0.307076000  | 2.916266000  | -1.982807000 |
| 1 | 1.269356000  | 3.079671000  | -2.458662000 |
| 6 | -0.829767000 | 3.422356000  | -2.598500000 |
| 1 | -0.745110000 | 3.948673000  | -3.543036000 |
| 6 | -2.145957000 | 2.542958000  | -0.801177000 |
| 1 | -3.116658000 | 2.386881000  | -0.341825000 |
| 6 | -2.067349000 | 3.250170000  | -1.993791000 |
| 1 | -2.968945000 | 3.645148000  | -2.449466000 |
| 1 | 6.144379000  | 2.024325000  | -2.059898000 |
| 1 | 1.025923000  | 5.202933000  | 3.317937000  |
| 8 | 0.383505000  | -0.548247000 | 1.621780000  |
| 6 | 1.300708000  | -0.660751000 | 0.749913000  |
| 8 | 1.928795000  | -1.565420000 | 0.291922000  |
| 1 | 1.562894000  | 0.423661000  | 0.321319000  |
| 1 | -0.259084000 | 0.454286000  | 1.349446000  |
| 6 | 1.285830000  | -0.207639000 | -2.507495000 |
| 6 | 3.537289000  | 0.621431000  | 2.266427000  |
| 1 | 3.407457000  | -0.790744000 | -3.714682000 |
| 1 | 3.082602000  | 1.666520000  | 4.505606000  |
| 9 | 5.734316000  | 3.731165000  | -0.745242000 |
| 9 | 3.693990000  | 4.119428000  | -2.208547000 |
| 9 | 4.874565000  | 2.724061000  | 0.943332000  |
| 9 | 7.156488000  | 0.092805000  | -3.354237000 |
| 9 | 6.027858000  | 0.920629000  | -4.992856000 |
| 9 | 5.705722000  | -1.129859000 | -4.399957000 |
| 9 | 1.482246000  | -1.481513000 | -2.869247000 |
| 9 | 0.759940000  | 0.421389000  | -3.574039000 |
| 9 | 0.323649000  | -0.239043000 | -1.575839000 |
| 9 | 0.636565000  | 3.475505000  | 6.021008000  |
| 9 | 2.772749000  | 3.313204000  | 6.282732000  |
| 9 | 1.892547000  | 5.186832000  | 5.644875000  |

|   |              |              |              |
|---|--------------|--------------|--------------|
| 9 | 3.848622000  | 0.295484000  | 1.013173000  |
| 9 | 4.694448000  | 0.849427000  | 2.907544000  |
| 9 | 2.985358000  | -0.453727000 | 2.847048000  |
| 9 | 1.359156000  | 4.821592000  | -0.426483000 |
| 9 | -0.480564000 | 4.698420000  | 0.705700000  |
| 9 | 1.064796000  | 6.072521000  | 1.282933000  |

**CF<sub>3</sub>**

E(RM062X) = -1255.43875211

|   |              |              |              |
|---|--------------|--------------|--------------|
| 6 | -1.241041000 | 1.634325000  | 0.458262000  |
| 6 | 0.090618000  | 1.854878000  | 0.842903000  |
| 5 | 1.266881000  | 0.808495000  | 0.756721000  |
| 8 | 1.308295000  | -2.298653000 | 1.975227000  |
| 6 | 0.616108000  | -1.580797000 | 1.336794000  |
| 8 | -0.322451000 | -1.770477000 | 0.486574000  |
| 6 | -2.300847000 | 0.165287000  | -1.190549000 |
| 1 | -1.609547000 | 0.592252000  | -1.914026000 |
| 1 | -2.441627000 | -0.896310000 | -1.411280000 |
| 1 | -3.269519000 | 0.672720000  | -1.255835000 |
| 6 | -2.684413000 | -0.166298000 | 1.185441000  |
| 1 | -2.934021000 | -1.212577000 | 0.994114000  |
| 1 | -2.222596000 | -0.083467000 | 2.171295000  |
| 1 | -3.598624000 | 0.435886000  | 1.166301000  |
| 7 | -1.716380000 | 0.283983000  | 0.161048000  |
| 1 | -0.815939000 | -0.813674000 | 0.255844000  |
| 1 | 0.765554000  | -0.392331000 | 1.515365000  |
| 6 | 0.442945000  | 3.165569000  | 1.212054000  |
| 1 | 1.461106000  | 3.371027000  | 1.523832000  |
| 6 | -0.469309000 | 4.213006000  | 1.163520000  |
| 1 | -0.158886000 | 5.213383000  | 1.445211000  |
| 6 | -2.161360000 | 2.679725000  | 0.415543000  |
| 1 | -3.188418000 | 2.485791000  | 0.120424000  |
| 6 | -1.776551000 | 3.971053000  | 0.757211000  |
| 1 | -2.499951000 | 4.778569000  | 0.716837000  |
| 6 | 2.550966000  | 1.004142000  | 1.713513000  |
| 9 | 2.207654000  | 1.299652000  | 2.983682000  |
| 9 | 3.334287000  | -0.083260000 | 1.760135000  |
| 9 | 3.322022000  | 2.027416000  | 1.274653000  |
| 6 | 1.656692000  | 0.238575000  | -0.702002000 |
| 9 | 2.450334000  | 1.145973000  | -1.303530000 |
| 9 | 2.324983000  | -0.926204000 | -0.683689000 |
| 9 | 0.594794000  | 0.055281000  | -1.524436000 |

**PFtB**

E(RM062X) = -2682.18017191

|   |              |             |              |
|---|--------------|-------------|--------------|
| 7 | -0.928010000 | 0.375372000 | -0.414159000 |
| 6 | -0.963165000 | 1.829335000 | -0.498009000 |
| 6 | 0.092690000  | 2.649419000 | -0.056441000 |
| 5 | 1.554724000  | 2.343531000 | 0.569005000  |
| 6 | 2.797360000  | 2.372040000 | -0.621123000 |
| 6 | 2.166291000  | 1.990450000 | -1.989303000 |
| 6 | 3.993164000  | 1.379994000 | -0.453635000 |
| 6 | 1.647434000  | 2.726789000 | 2.246652000  |
| 6 | 2.936463000  | 2.287265000 | 2.998402000  |
| 6 | 0.456063000  | 2.076251000 | 3.004259000  |
| 6 | 3.439377000  | 3.774716000 | -0.814087000 |
| 9 | 4.293073000  | 4.023773000 | 0.177191000  |
| 9 | 4.104096000  | 3.863603000 | -1.968572000 |
| 9 | 2.532676000  | 4.753908000 | -0.849683000 |
| 6 | 1.528130000  | 4.261866000 | 2.501476000  |
| 9 | 1.965921000  | 4.622854000 | 3.704934000  |
| 9 | 2.251327000  | 4.947347000 | 1.609179000  |
| 9 | 0.261263000  | 4.677279000 | 2.419686000  |
| 9 | 4.433821000  | 1.320481000 | 0.790998000  |
| 9 | 5.034410000  | 1.714879000 | -1.217755000 |
| 9 | 3.622009000  | 0.148251000 | -0.828746000 |
| 9 | 3.089539000  | 1.689686000 | -2.902926000 |

|   |              |              |              |
|---|--------------|--------------|--------------|
| 9 | 1.424870000  | 2.978165000  | -2.489651000 |
| 9 | 1.383627000  | 0.904990000  | -1.863885000 |
| 9 | 3.964452000  | 3.026958000  | 2.574180000  |
| 9 | 3.192765000  | 1.002768000  | 2.808070000  |
| 9 | 2.852581000  | 2.446763000  | 4.322851000  |
| 9 | -0.727406000 | 2.318764000  | 2.434741000  |
| 9 | 0.366814000  | 2.523054000  | 4.256951000  |
| 9 | 0.600518000  | 0.743341000  | 3.052135000  |
| 1 | 0.265468000  | -0.352104000 | -0.159919000 |
| 1 | 1.746034000  | 0.607575000  | 0.887234000  |
| 6 | -2.137814000 | 2.377007000  | -1.018611000 |
| 1 | -2.936103000 | 1.709898000  | -1.327164000 |
| 6 | -2.309887000 | 3.745104000  | -1.149996000 |
| 1 | -3.229285000 | 4.145566000  | -1.563090000 |
| 6 | -0.124288000 | 4.035476000  | -0.203058000 |
| 1 | 0.639645000  | 4.734501000  | 0.096340000  |
| 6 | -1.282488000 | 4.580207000  | -0.739570000 |
| 1 | -1.370970000 | 5.657477000  | -0.828009000 |
| 6 | 1.866891000  | -0.587993000 | 0.878647000  |
| 8 | 2.731104000  | -1.089127000 | 1.518687000  |
| 8 | 0.978683000  | -1.112383000 | 0.112309000  |
| 6 | -1.776390000 | -0.133549000 | 0.684421000  |
| 1 | -2.831465000 | 0.108321000  | 0.512489000  |
| 1 | -1.655587000 | -1.218273000 | 0.737591000  |
| 1 | -1.454537000 | 0.307949000  | 1.625608000  |
| 6 | -1.295773000 | -0.291803000 | -1.682294000 |
| 1 | -0.776748000 | 0.193726000  | -2.507119000 |
| 1 | -0.974903000 | -1.335520000 | -1.619918000 |
| 1 | -2.375693000 | -0.270731000 | -1.861060000 |

**C<sub>6</sub>F<sub>5</sub>**

E(RM062X) = -2035.73872997

|   |              |              |              |
|---|--------------|--------------|--------------|
| 7 | -1.313361000 | 1.339904000  | 0.964398000  |
| 6 | -1.082708000 | 2.082993000  | -0.288233000 |
| 6 | 0.206464000  | 2.218350000  | -0.820322000 |
| 5 | 1.577545000  | 1.809793000  | -0.112270000 |
| 6 | 2.785125000  | 1.377602000  | -1.050594000 |
| 6 | 2.592418000  | 0.381183000  | -2.008613000 |
| 6 | 4.075245000  | 1.896006000  | -0.967140000 |
| 6 | 3.603272000  | -0.080965000 | -2.837660000 |
| 6 | 5.112164000  | 1.465299000  | -1.783768000 |
| 6 | 4.872090000  | 0.471848000  | -2.723298000 |
| 6 | 1.900595000  | 2.450287000  | 1.311381000  |
| 6 | 2.851893000  | 1.878234000  | 2.159345000  |
| 6 | 1.299019000  | 3.608183000  | 1.797215000  |
| 6 | 3.164960000  | 2.382120000  | 3.410885000  |
| 6 | 1.580778000  | 4.146246000  | 3.047736000  |
| 6 | 2.520943000  | 3.530135000  | 3.858051000  |
| 6 | -2.216088000 | 0.176717000  | 0.746825000  |
| 1 | -2.242081000 | -0.408792000 | 1.666816000  |
| 1 | -3.220874000 | 0.510744000  | 0.482201000  |
| 1 | -1.804087000 | -0.433090000 | -0.057893000 |
| 6 | -1.825794000 | 2.201293000  | 2.059765000  |
| 1 | -2.869912000 | 2.467872000  | 1.876326000  |
| 1 | -1.748221000 | 1.642812000  | 2.995240000  |
| 1 | -1.226085000 | 3.107896000  | 2.109321000  |
| 6 | 0.303560000  | 2.893129000  | -2.046930000 |
| 1 | 1.284797000  | 3.005930000  | -2.498587000 |
| 6 | -0.802621000 | 3.435409000  | -2.691464000 |
| 1 | -0.679254000 | 3.956517000  | -3.634884000 |
| 6 | -2.200638000 | 2.620810000  | -0.919430000 |
| 1 | -3.186492000 | 2.507178000  | -0.478200000 |
| 6 | -2.063135000 | 3.305899000  | -2.121177000 |
| 1 | -2.937454000 | 3.724501000  | -2.607653000 |
| 8 | 0.365731000  | -0.193949000 | 1.939849000  |
| 6 | 1.184081000  | -0.524186000 | 1.030864000  |
| 8 | 1.878661000  | -1.467624000 | 0.797743000  |

|   |              |              |              |
|---|--------------|--------------|--------------|
| 1 | 1.240694000  | 0.351656000  | 0.208755000  |
| 1 | -0.375347000 | 0.746851000  | 1.427423000  |
| 9 | 4.071056000  | 1.789860000  | 4.181182000  |
| 9 | 3.493115000  | 0.775484000  | 1.769996000  |
| 9 | 2.803455000  | 4.030439000  | 5.053647000  |
| 9 | 0.952297000  | 5.243943000  | 3.465667000  |
| 9 | 0.385771000  | 4.273697000  | 1.071926000  |
| 9 | 4.364557000  | 2.858190000  | -0.084814000 |
| 9 | 6.327004000  | 1.998313000  | -1.679520000 |
| 9 | 5.853566000  | 0.052630000  | -3.512079000 |
| 9 | 3.372096000  | -1.034499000 | -3.735576000 |
| 9 | 1.386317000  | -0.181096000 | -2.137915000 |

### 5. FLP-H<sup>+</sup>/H<sup>-</sup> + HCOOH (TS)

**H**

E(RM062X) = -582.505333205

|   |              |              |              |
|---|--------------|--------------|--------------|
| 7 | -1.635997000 | 1.808916000  | 0.948735000  |
| 6 | -1.109879000 | 2.241146000  | -0.361723000 |
| 6 | 0.277651000  | 2.171351000  | -0.556900000 |
| 5 | 1.351764000  | 1.685712000  | 0.538189000  |
| 6 | -2.989328000 | 1.213230000  | 0.909070000  |
| 1 | -3.165739000 | 0.728734000  | 1.870647000  |
| 1 | -3.752260000 | 1.975242000  | 0.738634000  |
| 1 | -3.013331000 | 0.463672000  | 0.118958000  |
| 6 | -1.565436000 | 2.898276000  | 1.949580000  |
| 1 | -2.259546000 | 3.693132000  | 1.663388000  |
| 1 | -1.837470000 | 2.496820000  | 2.927959000  |
| 1 | -0.546872000 | 3.279575000  | 1.976003000  |
| 6 | 0.725174000  | 2.601126000  | -1.816272000 |
| 1 | 1.792427000  | 2.561014000  | -2.013338000 |
| 6 | -0.134732000 | 3.074849000  | -2.802237000 |
| 1 | 0.260207000  | 3.395184000  | -3.761315000 |
| 6 | -1.993701000 | 2.725184000  | -1.321590000 |
| 1 | -3.060092000 | 2.775561000  | -1.127949000 |
| 6 | -1.501603000 | 3.142161000  | -2.554273000 |
| 1 | -2.185003000 | 3.514114000  | -3.310380000 |
| 1 | 2.493193000  | 1.901378000  | 0.223956000  |
| 1 | 1.091955000  | 1.948375000  | 1.690081000  |
| 1 | -1.007584000 | 0.885859000  | 1.243955000  |
| 1 | 1.310558000  | 0.372192000  | 0.518036000  |
| 6 | 0.660690000  | -0.629506000 | 1.304233000  |
| 8 | 1.092189000  | -1.748410000 | 0.670005000  |
| 8 | -0.594873000 | -0.399164000 | 1.293807000  |
| 1 | 0.396463000  | -1.972937000 | 0.035318000  |
| 1 | 1.270125000  | -0.447167000 | 2.195028000  |

**Mes'**

E(RM062X) = -1280.40568129

|   |              |              |              |
|---|--------------|--------------|--------------|
| 7 | -1.585606000 | 1.264352000  | 0.066496000  |
| 6 | -1.085120000 | 2.300401000  | -0.863583000 |
| 6 | 0.286822000  | 2.582562000  | -0.874667000 |
| 5 | 1.467018000  | 1.974432000  | 0.072653000  |
| 6 | 2.699493000  | 1.478508000  | -0.844360000 |
| 6 | 2.432689000  | 0.412235000  | -1.723035000 |
| 6 | 3.995749000  | 2.022665000  | -0.880482000 |
| 6 | 3.379165000  | -0.158005000 | -2.569531000 |
| 6 | 4.949571000  | 1.457280000  | -1.736602000 |
| 6 | 4.678819000  | 0.375498000  | -2.567926000 |
| 6 | 1.799219000  | 2.662475000  | 1.499346000  |
| 6 | 2.573588000  | 1.864138000  | 2.362950000  |
| 6 | 1.393468000  | 3.918830000  | 1.993411000  |
| 6 | 2.957303000  | 2.245932000  | 3.645193000  |
| 6 | 1.776292000  | 4.304008000  | 3.284185000  |
| 6 | 2.545849000  | 3.501386000  | 4.120162000  |
| 6 | 4.404931000  | 3.220490000  | -0.052417000 |
| 1 | 4.607690000  | 2.946587000  | 0.987635000  |

|   |              |              |              |
|---|--------------|--------------|--------------|
| 1 | 5.307480000  | 3.678205000  | -0.466511000 |
| 1 | 3.618019000  | 3.979506000  | -0.022939000 |
| 6 | 5.745210000  | -0.196698000 | -3.464854000 |
| 1 | 5.928608000  | -1.254404000 | -3.245091000 |
| 1 | 5.456203000  | -0.137996000 | -4.520211000 |
| 1 | 6.688699000  | 0.339867000  | -3.343893000 |
| 6 | 0.586859000  | 4.905389000  | 1.178157000  |
| 1 | -0.370307000 | 4.493152000  | 0.842335000  |
| 1 | 0.379213000  | 5.803945000  | 1.764815000  |
| 1 | 1.122061000  | 5.211268000  | 0.273932000  |
| 6 | 2.932554000  | 3.968002000  | 5.499007000  |
| 1 | 2.560435000  | 3.286621000  | 6.272274000  |
| 1 | 4.021083000  | 4.012877000  | 5.615017000  |
| 1 | 2.531005000  | 4.962732000  | 5.704519000  |
| 6 | -2.884491000 | 0.651636000  | -0.294322000 |
| 1 | -2.995256000 | -0.246904000 | 0.314482000  |
| 1 | -3.709566000 | 1.338196000  | -0.096430000 |
| 1 | -2.864604000 | 0.375539000  | -1.348121000 |
| 6 | -1.615959000 | 1.750533000  | 1.471174000  |
| 1 | -2.363500000 | 2.543087000  | 1.557729000  |
| 1 | -1.879212000 | 0.911347000  | 2.119315000  |
| 1 | -0.631420000 | 2.136870000  | 1.741039000  |
| 6 | 0.688409000  | 3.539487000  | -1.823486000 |
| 1 | 1.752048000  | 3.750930000  | -1.907886000 |
| 6 | -0.203462000 | 4.216575000  | -2.644804000 |
| 1 | 0.160717000  | 4.954655000  | -3.352380000 |
| 6 | -2.005907000 | 2.967216000  | -1.672332000 |
| 1 | -3.063943000 | 2.735333000  | -1.627045000 |
| 6 | -1.564181000 | 3.938865000  | -2.561244000 |
| 1 | -2.278132000 | 4.457331000  | -3.192191000 |
| 1 | 5.949626000  | 1.888234000  | -1.757966000 |
| 1 | 1.462648000  | 5.280634000  | 3.650059000  |
| 1 | 2.913258000  | 0.894793000  | 1.994718000  |
| 6 | 3.797908000  | 1.336130000  | 4.503172000  |
| 1 | 3.292650000  | 1.089632000  | 5.443849000  |
| 1 | 4.016663000  | 0.401898000  | 3.981871000  |
| 1 | 4.751285000  | 1.805705000  | 4.770132000  |
| 1 | 1.413879000  | 0.015052000  | -1.752809000 |
| 6 | 3.018858000  | -1.304939000 | -3.478772000 |
| 1 | 1.974274000  | -1.596913000 | -3.345553000 |
| 1 | 3.160825000  | -1.040560000 | -4.532632000 |
| 1 | 3.644148000  | -2.184386000 | -3.287725000 |
| 8 | -0.234572000 | -0.862385000 | 0.207709000  |
| 6 | 0.753909000  | -0.533011000 | 0.937221000  |
| 8 | 1.940297000  | -1.146436000 | 0.806138000  |
| 1 | 1.018024000  | 0.827907000  | 0.523961000  |
| 1 | -0.915981000 | 0.356629000  | 0.058383000  |
| 1 | 0.629209000  | -0.220005000 | 1.986657000  |
| 1 | 2.064857000  | -1.364152000 | -0.132306000 |

**Mes**

E(RM062X) = -1280.39393719

|   |              |              |              |
|---|--------------|--------------|--------------|
| 7 | -1.659059000 | 1.618362000  | 0.301176000  |
| 6 | -1.076217000 | 2.525071000  | -0.710213000 |
| 6 | 0.315521000  | 2.575133000  | -0.888482000 |
| 5 | 1.523011000  | 1.851102000  | -0.045789000 |
| 6 | 2.739156000  | 1.434388000  | -1.033328000 |
| 6 | 2.526060000  | 0.457335000  | -2.034023000 |
| 6 | 4.033768000  | 2.002487000  | -0.957013000 |
| 6 | 3.582997000  | -0.007020000 | -2.819770000 |
| 6 | 5.065414000  | 1.526566000  | -1.769498000 |
| 6 | 4.871727000  | 0.497758000  | -2.686684000 |
| 6 | 1.883856000  | 2.427319000  | 1.436836000  |
| 6 | 2.641942000  | 1.615682000  | 2.319622000  |
| 6 | 1.473664000  | 3.691407000  | 1.944361000  |
| 6 | 2.852529000  | 1.995111000  | 3.649846000  |
| 6 | 1.713980000  | 4.040911000  | 3.274733000  |

|   |              |              |              |   |              |              |              |
|---|--------------|--------------|--------------|---|--------------|--------------|--------------|
| 6 | 2.376221000  | 3.194474000  | 4.160361000  | 6 | 1.483301000  | 3.687727000  | 2.022111000  |
| 6 | 4.364952000  | 3.174578000  | -0.055763000 | 6 | 2.658889000  | 1.858642000  | 3.715509000  |
| 1 | 4.531583000  | 2.874981000  | 0.983262000  | 6 | 1.524935000  | 3.924974000  | 3.395181000  |
| 1 | 5.272401000  | 3.669692000  | -0.411657000 | 6 | 2.057656000  | 2.980428000  | 4.254174000  |
| 1 | 3.560098000  | 3.914213000  | -0.041019000 | 6 | 4.441495000  | 3.164071000  | -0.637322000 |
| 6 | 6.013944000  | -0.040865000 | -3.508802000 | 6 | 5.569387000  | -0.632134000 | -3.583139000 |
| 1 | 6.746369000  | 0.740207000  | -3.729170000 | 6 | 1.083964000  | 4.913439000  | 1.215525000  |
| 1 | 6.538450000  | -0.840603000 | -2.974892000 | 6 | 2.014293000  | 3.192760000  | 5.739880000  |
| 1 | 5.660240000  | -0.455341000 | -4.456389000 | 6 | -2.933903000 | 1.211447000  | -0.052680000 |
| 6 | 0.825900000  | 4.764513000  | 1.090951000  | 1 | -3.154262000 | 0.411330000  | 0.656871000  |
| 1 | -0.196369000 | 4.523337000  | 0.783439000  | 1 | -3.788688000 | 1.889744000  | -0.106587000 |
| 1 | 0.790852000  | 5.704997000  | 1.646139000  | 1 | -2.735214000 | 0.779842000  | -1.033477000 |
| 1 | 1.389035000  | 4.940872000  | 0.171064000  | 6 | -1.964156000 | 2.615623000  | 1.683284000  |
| 6 | 2.575841000  | 3.574728000  | 5.604371000  | 1 | -1.025146000 | 3.005702000  | 2.071898000  |
| 1 | 3.438278000  | 3.058983000  | 6.033674000  | 1 | -2.660045000 | 3.444998000  | 1.521897000  |
| 1 | 2.732330000  | 4.651334000  | 5.712327000  | 1 | -2.387636000 | 1.904761000  | 2.396218000  |
| 1 | 1.699836000  | 3.309433000  | 6.206163000  | 6 | 0.702843000  | 3.569821000  | -1.923975000 |
| 6 | -3.010801000 | 1.102517000  | -0.021611000 | 1 | 1.758040000  | 3.593116000  | -2.172950000 |
| 1 | -3.183544000 | 0.235861000  | 0.618498000  | 6 | -0.156536000 | 4.381205000  | -2.654604000 |
| 1 | -3.776431000 | 1.857391000  | 0.165809000  | 1 | 0.234783000  | 4.993797000  | -3.459900000 |
| 1 | -3.030376000 | 0.793376000  | -1.066210000 | 6 | -1.973676000 | 3.581773000  | -1.329935000 |
| 6 | -1.636928000 | 2.188109000  | 1.671613000  | 1 | -3.032860000 | 3.579870000  | -1.089662000 |
| 1 | -2.261282000 | 3.085000000  | 1.702291000  | 6 | -1.508502000 | 4.401208000  | -2.344514000 |
| 1 | -2.025113000 | 1.433390000  | 2.358949000  | 1 | -2.199514000 | 5.032194000  | -2.893161000 |
| 1 | -0.609310000 | 2.435096000  | 1.939867000  | 1 | 5.918711000  | 1.564276000  | -2.059362000 |
| 6 | 0.741650000  | 3.435197000  | -1.919061000 | 1 | 1.173073000  | 4.869905000  | 3.791242000  |
| 1 | 1.806937000  | 3.478041000  | -2.130443000 | 8 | -0.681929000 | -0.358816000 | 1.028826000  |
| 6 | -0.120831000 | 4.232526000  | -2.661194000 | 6 | 0.606227000  | -0.428645000 | 0.919991000  |
| 1 | 0.273291000  | 4.883716000  | -3.434983000 | 8 | 1.099908000  | -1.404859000 | 0.134097000  |
| 6 | -1.963022000 | 3.324059000  | -1.432677000 | 1 | 0.993508000  | 0.737174000  | 0.341990000  |
| 1 | -3.030470000 | 3.273471000  | -1.248127000 | 1 | -1.032379000 | 0.810740000  | 0.742870000  |
| 6 | -1.486753000 | 4.190945000  | -2.407462000 | 1 | 1.221406000  | -0.304245000 | 1.818072000  |
| 1 | -2.179622000 | 4.808777000  | -2.968604000 | 1 | 0.373413000  | -1.684876000 | -0.444111000 |
| 1 | 6.051116000  | 1.981830000  | -1.687545000 | 1 | 2.892289000  | -1.042861000 | -3.529391000 |
| 1 | 1.385145000  | 5.016984000  | 3.627412000  | 6 | 0.843351000  | -0.002304000 | -2.475584000 |
| 8 | -0.669208000 | -0.646333000 | 0.528730000  | 6 | 3.545395000  | 0.484860000  | 1.951295000  |
| 6 | 0.561843000  | -0.591603000 | 0.864545000  | 1 | 3.185416000  | 1.167724000  | 4.363543000  |
| 8 | 1.393956000  | -1.529620000 | 0.367297000  | 9 | 5.032812000  | -1.287665000 | -4.621239000 |
| 1 | 1.046466000  | 0.637502000  | 0.300900000  | 9 | 6.192497000  | -1.539531000 | -2.819018000 |
| 1 | -1.091643000 | 0.635369000  | 0.369319000  | 9 | 6.512422000  | 0.191691000  | -4.061457000 |
| 1 | 0.873340000  | -0.295486000 | 1.876437000  | 9 | 0.492913000  | 0.629871000  | -3.602736000 |
| 1 | 0.964672000  | -1.880380000 | -0.427716000 | 9 | -0.150363000 | 0.210200000  | -1.597180000 |
| 1 | 3.388255000  | -0.772767000 | -3.569475000 | 9 | 0.789595000  | -1.326478000 | -2.741180000 |
| 6 | 1.147838000  | -0.061092000 | -2.393664000 | 9 | 4.257773000  | 3.283582000  | 0.680906000  |
| 1 | 0.710569000  | 0.570486000  | -3.176309000 | 9 | 3.814057000  | 4.201017000  | -1.219505000 |
| 1 | 1.210441000  | -1.076016000 | -2.801157000 | 9 | 5.753700000  | 3.347967000  | -0.847098000 |
| 1 | 0.433439000  | -0.056987000 | -1.570235000 | 9 | 1.807242000  | 5.023444000  | 0.101818000  |
| 6 | 3.381075000  | 0.365126000  | 1.883021000  | 9 | 1.309745000  | 6.033478000  | 1.925678000  |
| 1 | 4.442724000  | 0.607598000  | 1.750117000  | 9 | -0.216686000 | 4.959105000  | 0.881027000  |
| 1 | 3.323789000  | -0.410965000 | 2.653279000  | 9 | 3.296445000  | -0.112066000 | 0.785163000  |
| 1 | 3.044938000  | -0.056234000 | 0.940632000  | 9 | 3.522545000  | -0.491260000 | 2.880305000  |
| 1 | 3.429422000  | 1.334279000  | 4.295430000  | 9 | 4.805361000  | 0.938696000  | 1.897020000  |
|   |              |              |              | 9 | 2.082495000  | 4.493434000  | 6.052550000  |
|   |              |              |              | 9 | 0.872896000  | 2.721837000  | 6.265478000  |
|   |              |              |              | 9 | 3.022513000  | 2.566024000  | 6.358529000  |

### FMes

E(RM062X) = -3066.82658646

|   |              |              |              |
|---|--------------|--------------|--------------|
| 7 | -1.709081000 | 1.904376000  | 0.412759000  |
| 6 | -1.100135000 | 2.761641000  | -0.613709000 |
| 6 | 0.283494000  | 2.756388000  | -0.855251000 |
| 5 | 1.487573000  | 1.973998000  | -0.085489000 |
| 6 | 2.597944000  | 1.440081000  | -1.167491000 |
| 6 | 2.250711000  | 0.412723000  | -2.076229000 |
| 6 | 3.952094000  | 1.863409000  | -1.247437000 |
| 6 | 3.199400000  | -0.245872000 | -2.862640000 |
| 6 | 4.895729000  | 1.211328000  | -2.033176000 |
| 6 | 4.528369000  | 0.120835000  | -2.805499000 |
| 6 | 1.916753000  | 2.468146000  | 1.433646000  |
| 6 | 2.608403000  | 1.619426000  | 2.341694000  |

### CF<sub>3</sub>

E(RM062X) = -1256.63240007

|   |              |             |              |
|---|--------------|-------------|--------------|
| 7 | -1.719780000 | 1.695177000 | 0.879406000  |
| 6 | -1.133706000 | 2.286663000 | -0.329221000 |
| 6 | 0.258422000  | 2.277091000 | -0.523186000 |
| 5 | 1.356307000  | 1.685453000 | 0.480309000  |
| 6 | -2.942790000 | 0.909179000 | 0.611518000  |
| 1 | -3.190600000 | 0.350263000 | 1.517143000  |
| 1 | -3.793918000 | 1.543894000 | 0.348655000  |
| 1 | -2.744115000 | 0.204676000 | -0.196586000 |
| 6 | -2.012696000 | 2.745173000 | 1.879857000  |

|   |              |              |              |   |              |              |              |
|---|--------------|--------------|--------------|---|--------------|--------------|--------------|
| 1 | -2.856881000 | 3.358226000  | 1.542341000  | 6 | -1.293112000 | 4.420542000  | -1.120048000 |
| 1 | -2.261392000 | 2.269483000  | 2.831486000  | 1 | -1.346554000 | 5.461724000  | -1.419009000 |
| 1 | -1.137463000 | 3.376897000  | 2.012259000  | 6 | 1.750352000  | -0.712194000 | 0.573028000  |
| 6 | 0.728235000  | 2.904228000  | -1.690781000 | 8 | 2.930060000  | -1.239863000 | 1.007719000  |
| 1 | 1.794786000  | 2.924354000  | -1.883197000 | 8 | 0.702370000  | -1.185745000 | 1.310643000  |
| 6 | -0.120629000 | 3.510119000  | -2.609887000 | 6 | -2.231991000 | -0.051007000 | 0.815406000  |
| 1 | 0.290737000  | 3.981441000  | -3.496329000 | 1 | -3.166073000 | -0.089349000 | 0.239505000  |
| 6 | -1.992498000 | 2.898426000  | -1.242288000 | 1 | -2.052479000 | -1.052177000 | 1.222223000  |
| 1 | -3.062675000 | 2.906401000  | -1.063334000 | 1 | -2.347664000 | 0.650157000  | 1.642027000  |
| 6 | -1.491447000 | 3.506620000  | -2.386722000 | 6 | -0.998672000 | -0.495788000 | -1.204353000 |
| 1 | -2.170298000 | 3.974017000  | -3.092390000 | 1 | -0.163657000 | -0.171800000 | -1.825454000 |
| 1 | -0.991773000 | 0.608016000  | 1.390282000  | 1 | -0.837955000 | -1.535269000 | -0.900766000 |
| 1 | 1.069456000  | 0.437470000  | 0.752629000  | 1 | -1.921257000 | -0.436923000 | -1.800244000 |
| 6 | 0.647518000  | -0.561872000 | 1.591642000  | 1 | 2.906187000  | -1.223014000 | 1.973952000  |
| 8 | 1.140713000  | -1.676182000 | 1.045546000  | 1 | 1.669252000  | -0.899857000 | -0.504211000 |
| 8 | -0.648094000 | -0.434192000 | 1.581426000  |   |              |              |              |
| 1 | 0.480157000  | -2.009725000 | 0.419859000  |   |              |              |              |
| 1 | 1.236476000  | -0.253110000 | 2.457654000  |   |              |              |              |
| 6 | 1.446662000  | 2.392391000  | 1.939026000  |   |              |              |              |
| 9 | 1.229526000  | 3.724226000  | 1.881914000  |   |              |              |              |
| 9 | 0.508326000  | 1.910828000  | 2.816251000  |   |              |              |              |
| 9 | 2.624763000  | 2.220813000  | 2.564685000  |   |              |              |              |
| 6 | 2.825983000  | 1.415060000  | -0.131829000 |   |              |              |              |
| 9 | 3.543439000  | 2.552393000  | -0.295507000 |   |              |              |              |
| 9 | 3.562215000  | 0.605695000  | 0.660111000  |   |              |              |              |
| 9 | 2.792162000  | 0.813237000  | -1.343886000 |   |              |              |              |

#### PFtB

E(RM062X) = -2683.37056049

|   |              |              |              |
|---|--------------|--------------|--------------|
| 7 | -1.070135000 | 0.340939000  | 0.001446000  |
| 6 | -1.064502000 | 1.752179000  | -0.330857000 |
| 6 | 0.059892000  | 2.590839000  | -0.159978000 |
| 5 | 1.518734000  | 2.384065000  | 0.493758000  |
| 6 | 2.832068000  | 2.492079000  | -0.595800000 |
| 6 | 2.329828000  | 2.412374000  | -2.068317000 |
| 6 | 3.925969000  | 1.380638000  | -0.510457000 |
| 6 | 1.588267000  | 2.757353000  | 2.171788000  |
| 6 | 2.721638000  | 2.093614000  | 2.999379000  |
| 6 | 0.239064000  | 2.293859000  | 2.800229000  |
| 6 | 3.592305000  | 3.837853000  | -0.460158000 |
| 9 | 4.487495000  | 3.782894000  | 0.521613000  |
| 9 | 4.234437000  | 4.170037000  | -1.579923000 |
| 9 | 2.750816000  | 4.847437000  | -0.187835000 |
| 6 | 1.677505000  | 4.286561000  | 2.484026000  |
| 9 | 1.288167000  | 4.532208000  | 3.738634000  |
| 9 | 2.921776000  | 4.744414000  | 2.364456000  |
| 9 | 0.892689000  | 5.014687000  | 1.691233000  |
| 9 | 4.204700000  | 1.030355000  | 0.733836000  |
| 9 | 5.068144000  | 1.783797000  | -1.074493000 |
| 9 | 3.529991000  | 0.287455000  | -1.172181000 |
| 9 | 3.328154000  | 2.162271000  | -2.919047000 |
| 9 | 1.770552000  | 3.557883000  | -2.462059000 |
| 9 | 1.435662000  | 1.428790000  | -2.222910000 |
| 9 | 3.929576000  | 2.462158000  | 2.598074000  |
| 9 | 2.624342000  | 0.755961000  | 2.910005000  |
| 9 | 2.656839000  | 2.405547000  | 4.295616000  |
| 9 | -0.764834000 | 3.088224000  | 2.421432000  |
| 9 | 0.234137000  | 2.273398000  | 4.131361000  |
| 9 | -0.041112000 | 1.047106000  | 2.409018000  |
| 1 | -0.034292000 | -0.585600000 | 1.043222000  |
| 1 | 1.748259000  | 0.466735000  | 0.648271000  |
| 6 | -2.246628000 | 2.253547000  | -0.885585000 |
| 1 | -3.082583000 | 1.575581000  | -1.023436000 |
| 6 | -2.382540000 | 3.577152000  | -1.269693000 |
| 1 | -3.316933000 | 3.934595000  | -1.689359000 |
| 6 | -0.109449000 | 3.923728000  | -0.593597000 |
| 1 | 0.712986000  | 4.617267000  | -0.523900000 |

#### C<sub>6</sub>F<sub>5</sub>

E(RM062X) = -2036.92541028

|   |              |              |              |
|---|--------------|--------------|--------------|
| 7 | -1.631907000 | 1.273020000  | 0.272701000  |
| 6 | -1.141607000 | 2.260105000  | -0.697630000 |
| 6 | 0.233924000  | 2.514764000  | -0.785883000 |
| 5 | 1.443002000  | 1.861816000  | 0.063687000  |
| 6 | 2.650800000  | 1.390430000  | -0.893288000 |
| 6 | 2.413158000  | 0.400036000  | -1.840874000 |
| 6 | 3.944278000  | 1.900665000  | -0.888106000 |
| 6 | 3.371180000  | -0.077553000 | -2.720421000 |
| 6 | 4.937771000  | 1.459499000  | -1.755802000 |
| 6 | 4.649451000  | 0.463471000  | -2.676853000 |
| 6 | 1.870348000  | 2.587521000  | 1.438163000  |
| 6 | 2.829112000  | 1.988779000  | 2.255239000  |
| 6 | 1.352854000  | 3.788072000  | 1.917224000  |
| 6 | 3.271396000  | 2.531990000  | 3.450754000  |
| 6 | 1.768278000  | 4.370389000  | 3.111025000  |
| 6 | 2.735049000  | 3.740402000  | 3.879200000  |
| 6 | -2.941192000 | 0.670840000  | -0.047935000 |
| 1 | -3.065788000 | -0.204309000 | 0.593509000  |
| 1 | -3.763834000 | 1.368183000  | 0.133496000  |
| 1 | -2.943186000 | 0.354611000  | -1.091127000 |
| 6 | -1.650470000 | 1.826547000  | 1.645341000  |
| 1 | -1.961555000 | 1.036126000  | 2.332700000  |
| 1 | -0.648552000 | 2.163418000  | 1.909795000  |
| 1 | -2.343229000 | 2.671431000  | 1.703521000  |
| 6 | 0.621265000  | 3.494457000  | -1.712806000 |
| 1 | 1.681113000  | 3.713364000  | -1.818138000 |
| 6 | -0.287714000 | 4.192611000  | -2.498502000 |
| 1 | 0.062613000  | 4.941973000  | -3.200608000 |
| 6 | -2.068949000 | 2.951020000  | -1.477506000 |
| 1 | -3.129064000 | 2.742254000  | -1.391570000 |
| 6 | -1.644032000 | 3.916899000  | -2.382040000 |
| 1 | -2.372338000 | 4.444679000  | -2.988408000 |
| 8 | -0.396961000 | -0.826931000 | 0.597979000  |
| 6 | 0.817341000  | -0.600590000 | 0.982622000  |
| 8 | 1.788855000  | -1.360005000 | 0.466671000  |
| 1 | 1.051809000  | 0.682012000  | 0.525085000  |
| 1 | -0.934003000 | 0.214171000  | 0.374894000  |
| 1 | 1.042910000  | -0.349179000 | 2.027268000  |
| 1 | 1.460715000  | -1.673702000 | -0.391819000 |
| 9 | 3.081893000  | -1.042313000 | -3.593438000 |
| 9 | 5.588302000  | 0.029126000  | -3.511506000 |
| 9 | 6.158758000  | 1.988703000  | -1.714568000 |
| 9 | 4.288878000  | 2.876373000  | -0.037969000 |
| 9 | 1.189533000  | -0.167179000 | -1.910443000 |
| 9 | 3.363576000  | 0.817011000  | 1.880577000  |
| 9 | 0.391670000  | 4.438853000  | 1.248043000  |
| 9 | 1.237708000  | 5.520105000  | 3.525120000  |
| 9 | 3.137069000  | 4.280593000  | 5.024639000  |
| 9 | 4.190523000  | 1.914699000  | 4.189674000  |

**6. FLP-H<sup>+</sup>/H<sup>-</sup> + CH<sub>2</sub>(OH)<sub>2</sub> (TS)**

**H**

E(RM062X) = -583.629203977

|   |              |              |              |
|---|--------------|--------------|--------------|
| 6 | -1.148309000 | 1.714891000  | 0.065057000  |
| 6 | 0.213378000  | 1.557897000  | 0.394779000  |
| 5 | 1.004274000  | 0.181607000  | 0.766789000  |
| 1 | 0.402805000  | -2.710877000 | 0.569813000  |
| 1 | -0.165316000 | -2.938626000 | -2.153956000 |
| 6 | 0.518971000  | -2.529712000 | -0.492272000 |
| 8 | -0.448595000 | -0.823710000 | -1.610490000 |
| 8 | -0.182428000 | -3.288972000 | -1.242727000 |
| 6 | -3.217491000 | 0.639418000  | -0.739614000 |
| 1 | -2.972018000 | 0.999720000  | -1.741085000 |
| 1 | -3.668598000 | -0.353982000 | -0.822067000 |
| 1 | -3.962790000 | 1.311098000  | -0.289898000 |
| 6 | -2.316363000 | 0.083189000  | 1.414793000  |
| 1 | -2.778550000 | -0.908949000 | 1.374072000  |
| 1 | -1.401124000 | 0.028787000  | 2.001880000  |
| 1 | -3.017226000 | 0.780450000  | 1.897094000  |
| 7 | -1.996429000 | 0.528724000  | 0.053505000  |
| 1 | -1.093721000 | -0.440354000 | -0.913638000 |
| 1 | 1.799061000  | -0.079970000 | -0.147180000 |
| 1 | 0.253859000  | -0.154346000 | -1.562405000 |
| 1 | 1.346591000  | -1.923346000 | -0.838884000 |
| 1 | 1.634259000  | 0.310523000  | 1.796335000  |
| 1 | 0.238652000  | -0.778853000 | 0.908145000  |
| 6 | 0.977323000  | 2.736874000  | 0.378529000  |
| 1 | 2.032828000  | 2.653776000  | 0.627993000  |
| 6 | 0.455423000  | 3.984191000  | 0.055991000  |
| 1 | 1.095881000  | 4.861418000  | 0.053172000  |
| 6 | -1.693831000 | 2.963576000  | -0.251819000 |
| 1 | -2.746824000 | 3.060092000  | -0.494344000 |
| 6 | -0.893587000 | 4.099853000  | -0.262907000 |
| 1 | -1.325246000 | 5.063511000  | -0.514921000 |

**Mes'**

E(RM062X) = -1281.54491873

|   |              |              |               |
|---|--------------|--------------|---------------|
| 6 | 1.332228000  | -0.616765000 | -0.144615000  |
| 6 | 0.076514000  | -1.200889000 | -0.398367000  |
| 5 | -1.333356000 | -0.394418000 | -0.560957000  |
| 1 | -1.496204000 | 1.756317000  | -2.475373000  |
| 1 | -0.525363000 | -0.113369000 | -2.982560000  |
| 6 | -0.421444000 | 1.732477000  | -2.646980000  |
| 8 | -0.104221000 | 3.045138000  | -0.4111765000 |
| 8 | 0.133431000  | 0.679348000  | -3.030398000  |
| 6 | 1.576109000  | 1.110273000  | 1.502848000   |
| 1 | 0.746917000  | 0.636735000  | 2.033060000   |
| 1 | 1.524166000  | 2.194378000  | 1.653213000   |
| 1 | 2.524324000  | 0.736869000  | 1.920008000   |
| 6 | 2.552812000  | 1.439641000  | -0.672253000  |
| 1 | 2.505058000  | 1.127429000  | -1.718966000  |
| 1 | 3.548698000  | 1.184237000  | -0.280263000  |
| 1 | 2.440641000  | 2.528132000  | -0.615010000  |
| 7 | 1.456024000  | 0.818394000  | 0.069131000   |
| 1 | 0.254837000  | 2.144212000  | -0.208060000  |
| 1 | -0.967498000 | 3.055239000  | 0.017405000   |
| 1 | 0.190174000  | 2.626311000  | -2.583788000  |
| 1 | -1.070538000 | 0.803720000  | -0.694682000  |
| 6 | 0.070839000  | -2.608406000 | -0.473838000  |
| 1 | -0.879429000 | -3.106371000 | -0.650462000  |
| 6 | 1.211698000  | -3.390900000 | -0.345696000  |
| 1 | 1.142632000  | -4.472498000 | -0.415495000  |
| 6 | 2.489973000  | -1.394913000 | -0.014849000  |
| 1 | 3.441351000  | -0.910915000 | 0.189565000   |

|   |              |              |              |
|---|--------------|--------------|--------------|
| 6 | 2.441285000  | -2.777058000 | -0.124154000 |
| 1 | 3.347428000  | -3.366096000 | -0.022554000 |
| 6 | -2.118796000 | -0.731431000 | -1.967851000 |
| 6 | -1.612237000 | -1.601417000 | -2.958749000 |
| 6 | -3.286765000 | -0.003591000 | -2.332422000 |
| 6 | -2.190021000 | -1.781403000 | -4.227278000 |
| 6 | -3.858016000 | -0.181131000 | -3.591081000 |
| 6 | -3.338217000 | -1.055180000 | -4.550722000 |
| 1 | -4.751362000 | 0.388771000  | -3.843217000 |
| 6 | -2.214323000 | -0.454467000 | 0.811998000  |
| 6 | -3.104691000 | -1.471892000 | 1.206101000  |
| 6 | -2.055399000 | 0.608191000  | 1.717525000  |
| 6 | -3.776620000 | -1.371866000 | 2.430740000  |
| 6 | -2.701108000 | 0.706257000  | 2.946833000  |
| 6 | -3.594046000 | -0.312027000 | 3.312894000  |
| 1 | -4.472452000 | -2.163109000 | 2.708638000  |
| 6 | -4.001739000 | -1.210225000 | -5.893850000 |
| 1 | -4.879258000 | -0.565583000 | -5.975414000 |
| 1 | -3.318257000 | -0.957486000 | -6.711862000 |
| 1 | -4.326043000 | -2.243209000 | -6.059454000 |
| 6 | -3.933190000 | 0.964582000  | -1.370589000 |
| 1 | -3.197398000 | 1.645913000  | -0.926329000 |
| 1 | -4.708255000 | 1.553016000  | -1.868211000 |
| 1 | -4.381145000 | 0.434637000  | -0.524926000 |
| 6 | -3.364530000 | -2.706017000 | 0.372068000  |
| 1 | -2.683396000 | -3.516439000 | 0.656184000  |
| 1 | -4.383248000 | -3.073429000 | 0.527583000  |
| 1 | -3.229608000 | -2.519363000 | -0.695138000 |
| 6 | -4.336080000 | -0.255034000 | 4.622781000  |
| 1 | -4.996796000 | -1.117381000 | 4.736687000  |
| 1 | -3.646509000 | -0.245358000 | 5.474499000  |
| 1 | -4.947733000 | 0.650963000  | 4.700620000  |
| 6 | -1.586284000 | -2.748132000 | -5.211769000 |
| 1 | -0.683997000 | -3.209991000 | -4.806004000 |
| 1 | -2.291280000 | -3.548384000 | -5.462049000 |
| 1 | -1.323005000 | -2.253074000 | -6.152985000 |
| 6 | -2.457147000 | 1.881868000  | 3.857325000  |
| 1 | -3.375376000 | 2.452680000  | 4.037570000  |
| 1 | -2.087412000 | 1.561123000  | 4.837662000  |
| 1 | -1.717020000 | 2.561694000  | 3.427153000  |
| 1 | -1.378810000 | 1.417773000  | 1.440041000  |
| 1 | -0.733814000 | -2.201257000 | -2.724598000 |

**Mes**

E(RM062X) = -1281.52334145

|   |              |              |              |
|---|--------------|--------------|--------------|
| 6 | 1.131382000  | -1.518916000 | 0.019125000  |
| 6 | -0.115415000 | -1.702839000 | -0.611651000 |
| 5 | -1.258169000 | -0.545222000 | -0.789984000 |
| 1 | -0.677866000 | 1.738090000  | -2.398139000 |
| 1 | 1.230383000  | 0.702852000  | -2.505677000 |
| 6 | 0.228588000  | 2.168402000  | -1.977671000 |
| 8 | 0.370478000  | 2.244191000  | 0.433679000  |
| 8 | 1.357689000  | 1.613032000  | -2.158172000 |
| 6 | 1.290975000  | -0.227195000 | 2.061108000  |
| 1 | 0.251348000  | -0.462488000 | 2.292633000  |
| 1 | 1.511863000  | 0.775944000  | 2.439951000  |
| 1 | 1.951372000  | -0.951956000 | 2.561422000  |
| 6 | 2.848933000  | 0.204531000  | 0.295596000  |
| 1 | 2.931224000  | 1.272701000  | 0.522034000  |
| 1 | 3.056297000  | 0.051974000  | -0.766141000 |
| 1 | 3.617125000  | -0.327977000 | 0.875324000  |
| 7 | 1.485715000  | -0.232800000 | 0.604938000  |
| 1 | 0.645075000  | 1.285308000  | 0.383369000  |
| 1 | -0.465489000 | 2.195578000  | 0.920815000  |
| 1 | 0.264130000  | 3.167990000  | -1.568367000 |
| 1 | -0.609970000 | 0.485010000  | -1.061802000 |
| 6 | -0.340412000 | -2.984142000 | -1.150600000 |

|   |              |              |              |   |              |              |              |
|---|--------------|--------------|--------------|---|--------------|--------------|--------------|
| 1 | -1.282241000 | -3.158327000 | -1.666997000 | 1 | 0.771476000  | 0.540595000  | 1.349332000  |
| 6 | 0.572537000  | -4.026939000 | -1.052183000 | 1 | 0.109256000  | 1.057601000  | 2.651635000  |
| 1 | 0.340702000  | -4.997131000 | -1.481684000 | 1 | 1.164723000  | 2.589427000  | 0.179377000  |
| 6 | 2.056774000  | -2.564765000 | 0.129110000  | 1 | -0.363515000 | 0.354612000  | -0.987366000 |
| 1 | 3.001410000  | -2.395308000 | 0.639191000  | 6 | -0.614660000 | -3.143768000 | -0.969316000 |
| 6 | 1.785323000  | -3.819042000 | -0.401061000 | 1 | -1.624331000 | -3.226143000 | -1.356827000 |
| 1 | 2.512773000  | -4.619498000 | -0.309310000 | 6 | 0.156954000  | -4.298472000 | -0.938175000 |
| 6 | -2.179833000 | -0.793075000 | -2.136272000 | 1 | -0.256064000 | -5.236574000 | -1.295695000 |
| 6 | -1.582265000 | -0.739138000 | -3.418799000 | 6 | 1.946876000  | -3.018379000 | -0.007171000 |
| 6 | -3.584869000 | -1.015477000 | -2.127259000 | 1 | 2.966871000  | -2.964411000 | 0.359389000  |
| 6 | -2.335673000 | -0.809985000 | -4.596417000 | 6 | 1.456698000  | -4.237745000 | -0.454139000 |
| 6 | -4.311250000 | -1.084582000 | -3.316513000 | 1 | 2.086463000  | -5.121362000 | -0.428189000 |
| 6 | -3.713501000 | -0.960776000 | -4.569564000 | 6 | -2.072978000 | -0.858836000 | -2.086034000 |
| 1 | -5.385681000 | -1.254203000 | -3.263467000 | 6 | -1.561082000 | -0.635451000 | -3.393011000 |
| 6 | -2.028897000 | -0.087832000 | 0.586507000  | 6 | -3.406240000 | -1.333599000 | -2.078981000 |
| 6 | -2.148508000 | -0.886643000 | 1.752361000  | 6 | -2.319679000 | -0.766807000 | -4.550410000 |
| 6 | -2.606514000 | 1.204748000  | 0.660921000  | 6 | -4.180952000 | -1.464177000 | -3.234786000 |
| 6 | -2.696567000 | -0.365638000 | 2.928421000  | 6 | -3.647644000 | -1.156815000 | -4.469608000 |
| 6 | -3.149300000 | 1.699348000  | 1.851842000  | 1 | -5.200638000 | -1.822801000 | -3.165663000 |
| 6 | -3.177129000 | 0.937752000  | 3.015037000  | 6 | -2.057002000 | 0.080909000  | 0.499906000  |
| 1 | -2.766084000 | -1.009771000 | 3.803787000  | 6 | -2.158529000 | -0.381505000 | 1.843684000  |
| 6 | -4.533878000 | -1.010663000 | -5.832405000 | 6 | -2.816270000 | 1.262402000  | 0.255396000  |
| 1 | -3.897673000 | -1.115676000 | -6.714640000 | 6 | -2.932352000 | 0.252180000  | 2.812406000  |
| 1 | -5.233643000 | -1.851170000 | -5.816250000 | 6 | -3.591583000 | 1.901048000  | 1.229882000  |
| 1 | -5.126355000 | -0.097842000 | -5.954505000 | 6 | -3.651344000 | 1.396421000  | 2.509840000  |
| 6 | -4.373613000 | -1.220417000 | -0.851831000 | 1 | -2.989319000 | -0.153538000 | 3.814080000  |
| 1 | -4.551545000 | -0.282613000 | -0.316922000 | 6 | -4.482552000 | -1.223120000 | -5.714218000 |
| 1 | -5.344679000 | -1.666069000 | -1.083311000 | 6 | -4.146386000 | -1.746556000 | -0.822077000 |
| 1 | -3.852661000 | -1.881538000 | -0.156738000 | 6 | -1.392260000 | -1.579859000 | 2.387731000  |
| 6 | -1.757882000 | -2.350284000 | 1.787533000  | 6 | -4.435017000 | 2.105005000  | 3.575502000  |
| 1 | -2.197346000 | -2.831554000 | 2.665229000  | 6 | -0.125754000 | -0.230179000 | -3.635050000 |
| 1 | -2.108412000 | -2.880380000 | 0.898548000  | 6 | -3.030482000 | 1.931086000  | -1.092837000 |
| 1 | -0.674577000 | -2.504209000 | 1.826323000  | 1 | -1.877029000 | -0.577539000 | -5.520598000 |
| 6 | -3.722328000 | 1.489055000  | 4.306930000  | 1 | -4.167507000 | 2.784426000  | 0.981531000  |
| 1 | -2.920030000 | 1.893548000  | 4.933583000  | 9 | -3.777007000 | -1.690859000 | -6.754553000 |
| 1 | -4.435248000 | 2.296999000  | 4.123480000  | 9 | -5.552505000 | -2.012461000 | -5.556137000 |
| 1 | -4.228517000 | 0.712350000  | 4.886259000  | 9 | -4.934073000 | -0.009062000 | -6.067506000 |
| 6 | -0.079436000 | -0.666776000 | -3.637444000 | 9 | 0.203813000  | -0.289592000 | -4.934204000 |
| 1 | 0.474455000  | -0.851370000 | -2.711318000 | 9 | 0.124261000  | 1.060656000  | -3.272022000 |
| 1 | 0.240493000  | -1.453029000 | -4.327500000 | 9 | 0.757425000  | -0.985125000 | -2.984648000 |
| 1 | 0.216623000  | 0.278834000  | -4.118349000 | 9 | -4.751808000 | -0.713634000 | -0.208628000 |
| 6 | -2.723568000 | 2.108466000  | -0.552067000 | 9 | -3.355317000 | -2.340419000 | 0.075320000  |
| 1 | -2.819975000 | 1.534829000  | -1.477086000 | 9 | -5.122060000 | -2.628198000 | -1.104822000 |
| 1 | -3.606074000 | 2.747278000  | -0.460368000 | 9 | -1.981397000 | 1.852600000  | -1.967233000 |
| 1 | -1.859579000 | 2.777729000  | -0.642685000 | 9 | -4.089300000 | 1.463652000  | -1.744802000 |
| 1 | -1.823366000 | -0.762640000 | -5.557211000 | 9 | -3.212672000 | 3.259676000  | -0.947108000 |
| 1 | -3.582443000 | 2.699018000  | 1.861110000  | 9 | -1.526412000 | -2.703237000 | 1.700510000  |
|   |              |              |              | 9 | -0.072507000 | -1.296276000 | 2.469464000  |
|   |              |              |              | 9 | -1.768197000 | -1.869871000 | 3.648930000  |
|   |              |              |              | 9 | -5.458625000 | 2.796887000  | 3.057417000  |
|   |              |              |              | 9 | -4.929387000 | 1.247114000  | 4.476430000  |
|   |              |              |              | 9 | -3.668809000 | 2.980495000  | 4.246502000  |

### FMe<sub>s</sub>

E(RM062X) = -3067.99065453

|   |              |              |              |
|---|--------------|--------------|--------------|
| 6 | 1.153954000  | -1.866371000 | -0.020870000 |
| 6 | -0.169256000 | -1.892434000 | -0.508446000 |
| 5 | -1.133339000 | -0.585033000 | -0.726033000 |
| 1 | -0.661517000 | 2.195018000  | -0.006888000 |
| 1 | -0.451102000 | 2.768857000  | -2.129725000 |
| 6 | 0.276429000  | 2.531429000  | -0.442947000 |
| 8 | 0.514633000  | 1.371167000  | 1.837564000  |
| 8 | 0.375814000  | 2.944554000  | -1.623137000 |
| 6 | 2.674925000  | -0.810803000 | 1.594103000  |
| 1 | 2.234965000  | -1.493779000 | 2.320660000  |
| 1 | 2.827034000  | 0.163414000  | 2.068845000  |
| 1 | 3.655886000  | -1.199859000 | 1.287273000  |
| 6 | 2.447451000  | 0.090444000  | -0.600809000 |
| 1 | 2.863055000  | 1.020247000  | -0.191151000 |
| 1 | 1.764240000  | 0.318022000  | -1.419056000 |
| 1 | 3.283569000  | -0.498632000 | -1.007618000 |
| 7 | 1.750830000  | -0.630147000 | 0.467127000  |

### CF<sub>3</sub>

E(RM062X) = -1257.79890042

|   |              |              |              |
|---|--------------|--------------|--------------|
| 6 | 2.727744000  | -0.788217000 | 0.720170000  |
| 6 | 1.427126000  | -1.148228000 | 0.330349000  |
| 5 | 0.329846000  | -0.023855000 | -0.005998000 |
| 1 | -0.536398000 | 2.593245000  | -0.464908000 |
| 1 | -0.990401000 | 1.514847000  | -2.266555000 |
| 6 | -0.006957000 | 2.808647000  | -1.390869000 |
| 8 | 1.630438000  | 2.971675000  | 0.643368000  |
| 8 | -0.328375000 | 2.250687000  | -2.467441000 |
| 6 | 3.774715000  | 1.019938000  | 1.979606000  |
| 1 | 3.174032000  | 0.692966000  | 2.830079000  |
| 1 | 3.841160000  | 2.112796000  | 1.993007000  |
| 1 | 4.791903000  | 0.613341000  | 2.080021000  |

|   |              |              |              |
|---|--------------|--------------|--------------|
| 6 | 3.896570000  | 0.969758000  | -0.431922000 |
| 1 | 3.343357000  | 0.688053000  | -1.331605000 |
| 1 | 4.873707000  | 0.462490000  | -0.449034000 |
| 1 | 4.061135000  | 2.052626000  | -0.438317000 |
| 7 | 3.104650000  | 0.614341000  | 0.745148000  |
| 1 | 1.999408000  | 2.051599000  | 0.666436000  |
| 1 | 1.142884000  | 3.019020000  | 1.474258000  |
| 1 | 0.778357000  | 3.557498000  | -1.426116000 |
| 1 | 0.839787000  | 0.899602000  | -0.621272000 |
| 6 | 1.127799000  | -2.517444000 | 0.303644000  |
| 1 | 0.127823000  | -2.834640000 | 0.022587000  |
| 6 | 2.066539000  | -3.489204000 | 0.637561000  |
| 1 | 1.794615000  | -4.539769000 | 0.608048000  |
| 6 | 3.677497000  | -1.757169000 | 1.049109000  |
| 1 | 4.681246000  | -1.454422000 | 1.334959000  |
| 6 | 3.349830000  | -3.108099000 | 1.013558000  |
| 1 | 4.092881000  | -3.854555000 | 1.276289000  |
| 6 | -0.858476000 | -0.556090000 | -0.968000000 |
| 9 | -1.730216000 | 0.525333000  | -1.354467000 |
| 9 | -0.434839000 | -1.102142200 | -2.155513000 |
| 9 | -1.713510000 | -1.456523000 | -0.477500000 |
| 6 | -0.325891000 | 0.556249000  | 1.359487000  |
| 9 | -1.134222000 | 1.661866000  | 1.165412000  |
| 9 | -1.107718000 | -0.330033000 | 2.000617000  |
| 9 | 0.588128000  | 0.974820000  | 2.277377000  |

**PFtB**

E(RM062X) = -2684.53874871

|   |              |              |              |
|---|--------------|--------------|--------------|
| 6 | 2.583099000  | -0.698408000 | 0.454583000  |
| 6 | 1.209896000  | -1.009110000 | 0.568976000  |
| 5 | -0.063496000 | -0.059727000 | 0.140201000  |
| 1 | -0.706058000 | 2.574260000  | -1.258455000 |
| 1 | 1.042567000  | 2.338123000  | -2.498332000 |
| 6 | 0.218216000  | 3.095529000  | -1.025554000 |
| 8 | 1.908538000  | 3.068071000  | 0.953603000  |
| 8 | 1.210796000  | 3.001333000  | -1.794431000 |
| 6 | 3.849200000  | 1.003114000  | 1.560813000  |
| 1 | 3.246083000  | 0.785763000  | 2.442857000  |
| 1 | 4.092799000  | 2.068364000  | 1.545364000  |
| 1 | 4.780750000  | 0.425276000  | 1.623357000  |
| 6 | 3.932183000  | 0.930212000  | -0.816807000 |
| 1 | 3.461932000  | 0.572102000  | -1.729299000 |
| 1 | 4.915727000  | 0.445500000  | -0.726755000 |
| 1 | 4.096583000  | 2.010409000  | -0.894472000 |
| 7 | 3.074284000  | 0.674347000  | 0.345869000  |
| 1 | 2.139631000  | 2.151426000  | 0.646438000  |
| 1 | 1.587716000  | 2.922303000  | 1.850881000  |
| 1 | 0.350527000  | 3.746419000  | -0.168083000 |
| 1 | 0.319054000  | 1.059731000  | -0.188041000 |
| 6 | 0.943819000  | -2.317516000 | 1.019866000  |
| 1 | -0.079491000 | -2.591054000 | 1.231249000  |
| 6 | 1.913740000  | -3.293943000 | 1.195793000  |
| 1 | 1.625923000  | -4.284609000 | 1.532706000  |
| 6 | 3.562647000  | -1.691241000 | 0.576952000  |
| 1 | 4.606002000  | -1.422576000 | 0.435887000  |
| 6 | 3.241342000  | -2.994887000 | 0.920071000  |
| 1 | 4.018384000  | -3.747178000 | 1.010510000  |
| 6 | -1.109164000 | 0.316809000  | 1.495783000  |
| 6 | -0.699974000 | -0.736647000 | -1.417573000 |
| 6 | -0.538174000 | -2.266676000 | -1.641089000 |
| 9 | -1.147127000 | -2.673052000 | -2.769963000 |
| 9 | 0.754461000  | -2.585734000 | -1.774707000 |
| 9 | -1.070476000 | -3.001400000 | -0.670452000 |
| 6 | -2.156003000 | -0.430009000 | -1.819220000 |
| 9 | -2.525173000 | 0.807062000  | -1.467577000 |
| 9 | -2.350764000 | -0.494132000 | -3.149741000 |
| 9 | -2.998315000 | -1.295433000 | -1.259420000 |

|   |              |              |              |
|---|--------------|--------------|--------------|
| 6 | 0.162500000  | -0.104822000 | -2.523359000 |
| 9 | 1.432994000  | 0.108462000  | -2.160555000 |
| 9 | 0.202903000  | -0.764595000 | -3.673462000 |
| 9 | -0.310910000 | 1.151647000  | -2.853470000 |
| 6 | -2.368965000 | -0.548146000 | 1.658662000  |
| 9 | -3.371230000 | -0.050216000 | 0.920925000  |
| 9 | -2.163016000 | -1.807648000 | 1.266464000  |
| 9 | -2.809096000 | -0.604144000 | 2.923104000  |
| 6 | -0.288398000 | 0.185848000  | 2.802490000  |
| 9 | -0.847461000 | 0.839446000  | 3.833071000  |
| 9 | -0.159055000 | -1.082891000 | 3.183385000  |
| 9 | 0.942623000  | 0.715616000  | 2.667663000  |
| 6 | -1.596769000 | 1.784543000  | 1.521243000  |
| 9 | -2.056300000 | 2.241807000  | 0.346576000  |
| 9 | -2.578367000 | 1.992763000  | 2.401558000  |
| 9 | -0.591310000 | 2.622392000  | 1.851641000  |

**C<sub>6</sub>F<sub>5</sub>**

E(RM062X) = -2038.07043438

|   |              |              |              |
|---|--------------|--------------|--------------|
| 6 | 1.026127000  | -1.973995000 | 0.119495000  |
| 6 | -0.131490000 | -1.949912000 | -0.677324000 |
| 5 | -0.981181000 | -0.595015000 | -0.898752000 |
| 1 | -0.635546000 | 2.228298000  | -1.518330000 |
| 1 | 0.420125000  | 1.266423000  | -3.216759000 |
| 6 | 0.442781000  | 2.288251000  | -1.645831000 |
| 8 | 0.588274000  | 1.844169000  | 0.927167000  |
| 8 | 1.018769000  | 1.849680000  | -2.678083000 |
| 6 | 1.831810000  | -0.869615000 | 2.150175000  |
| 1 | 1.004795000  | -1.356750000 | 2.668462000  |
| 1 | 1.974688000  | 0.134648000  | 2.562739000  |
| 1 | 2.753269000  | -1.443824000 | 2.325160000  |
| 6 | 2.622468000  | -0.190333000 | -0.021876000 |
| 1 | 2.882131000  | 0.793435000  | 0.384085000  |
| 1 | 2.335165000  | -0.084058000 | -1.071928000 |
| 1 | 3.509256000  | -0.840109000 | 0.028586000  |
| 7 | 1.492051000  | -0.739176000 | 0.731113000  |
| 1 | 0.668776000  | 0.857758000  | 0.835240000  |
| 1 | -0.170328000 | 1.975346000  | 1.507008000  |
| 1 | 1.063741000  | 2.814338000  | -0.928737000 |
| 1 | -0.174200000 | 0.302707000  | -1.173573000 |
| 6 | -0.509805000 | -3.164630000 | -1.262153000 |
| 1 | -1.399704000 | -3.193043000 | -1.885936000 |
| 6 | 0.202683000  | -4.345904000 | -1.068206000 |
| 1 | -0.134636000 | -5.266812000 | -1.533800000 |
| 6 | 1.754492000  | -3.146422000 | 0.313234000  |
| 1 | 2.649940000  | -3.132267000 | 0.928763000  |
| 6 | 1.342745000  | -4.339011000 | -0.274645000 |
| 1 | 1.911499000  | -5.249436000 | -0.114207000 |
| 6 | -2.023815000 | -0.715996000 | -2.156019000 |
| 6 | -1.690244000 | -0.412588000 | -3.464366000 |
| 6 | -3.333293000 | -1.171192000 | -2.005499000 |
| 6 | -2.542319000 | -0.505398000 | -4.555082000 |
| 6 | -4.234995000 | -1.288866000 | -3.057168000 |
| 6 | -3.838591000 | -0.949709000 | -4.344084000 |
| 6 | -1.767660000 | -0.022033000 | 0.418403000  |
| 6 | -1.791305000 | -0.597295000 | 1.685262000  |
| 6 | -2.442244000 | 1.192201000  | 0.335332000  |
| 6 | -2.394673000 | 0.002726000  | 2.789239000  |
| 6 | -3.066151000 | 1.828984000  | 1.397053000  |
| 6 | -3.038789000 | 1.222119000  | 2.647221000  |
| 9 | -1.207309000 | -1.777665000 | 1.925449000  |
| 9 | -2.363315000 | -0.590644000 | 3.981316000  |
| 9 | -3.624154000 | 1.804591000  | 3.690234000  |
| 9 | -3.682398000 | 3.000407000  | 1.234559000  |
| 9 | -2.484817000 | 1.850431000  | -0.852340000 |
| 9 | -3.779754000 | -1.539054000 | -0.798898000 |
| 9 | -0.415233000 | 0.007051000  | -3.774478000 |



|   |              |              |              |
|---|--------------|--------------|--------------|
| 9 | -2.131018000 | -0.178063000 | -5.779836000 |
| 9 | -5.473482000 | -1.726631000 | -2.846099000 |
| 9 | -4.687906000 | -1.054135000 | -5.361748000 |

|   |              |              |              |
|---|--------------|--------------|--------------|
| 6 | 3.024576000  | 3.837167000  | 5.440431000  |
| 1 | 2.682856000  | 3.143529000  | 6.216822000  |
| 1 | 4.115949000  | 3.889407000  | 5.521378000  |
| 1 | 2.622735000  | 4.826133000  | 5.671511000  |
| 6 | -2.949368000 | 0.775104000  | -0.334417000 |
| 1 | -3.060898000 | -0.129180000 | 0.263919000  |
| 1 | -3.763529000 | 1.470939000  | -0.131873000 |
| 1 | -2.917719000 | 0.521568000  | -1.393193000 |
| 6 | -1.692338000 | 1.860019000  | 1.463613000  |
| 1 | -2.424774000 | 2.666359000  | 1.532112000  |
| 1 | -1.975747000 | 1.013213000  | 2.090588000  |
| 1 | -0.701097000 | 2.220878000  | 1.743096000  |
| 6 | 0.711514000  | 3.532430000  | -1.869354000 |
| 1 | 1.783024000  | 3.671535000  | -1.989212000 |
| 6 | -0.160871000 | 4.278089000  | -2.652574000 |
| 1 | 0.229894000  | 4.998500000  | -3.364233000 |
| 6 | -2.015741000 | 3.141778000  | -1.640869000 |
| 1 | -3.084576000 | 2.974967000  | -1.563605000 |
| 6 | -1.535358000 | 4.097208000  | -2.527669000 |
| 1 | -2.229910000 | 4.674483000  | -3.128200000 |
| 1 | 5.824449000  | 2.148203000  | -1.887981000 |
| 1 | 1.497747000  | 5.167312000  | 3.651549000  |
| 1 | 2.917347000  | 0.815146000  | 1.896102000  |
| 6 | 3.876565000  | 1.225817000  | 4.381228000  |
| 1 | 3.397715000  | 0.948316000  | 5.327080000  |
| 1 | 4.101083000  | 0.307711000  | 3.834146000  |
| 1 | 4.827205000  | 1.706742000  | 4.636741000  |
| 1 | 1.595692000  | -0.321340000 | -1.543313000 |
| 6 | 3.323969000  | -1.563877000 | -3.196159000 |
| 1 | 2.330310000  | -1.975089000 | -3.004476000 |
| 1 | 3.419623000  | -1.401497000 | -4.275717000 |
| 1 | 4.062513000  | -2.326638000 | -2.924613000 |
| 8 | -0.601428000 | -0.931124000 | 0.679477000  |
| 6 | 0.526651000  | -0.583061000 | 1.097498000  |
| 1 | 0.886229000  | 0.762003000  | 0.429347000  |
| 1 | -1.015671000 | 0.545013000  | 0.076998000  |
| 1 | 0.647330000  | -0.115705000 | 2.092784000  |
| 1 | 1.446916000  | -1.044010000 | 0.699876000  |

### 7. FLP-H<sup>+</sup>/H<sup>-</sup> + CH<sub>2</sub>O (TS)

H  
E(RM062X) = -507.257766658

|   |              |              |              |
|---|--------------|--------------|--------------|
| 7 | -1.644322000 | 1.870811000  | 0.999740000  |
| 6 | -1.106242000 | 2.239801000  | -0.335684000 |
| 6 | 0.276715000  | 2.134588000  | -0.517732000 |
| 5 | 1.333533000  | 1.640652000  | 0.600636000  |
| 6 | -2.978981000 | 1.222182000  | 0.975201000  |
| 1 | -3.158964000 | 0.800020000  | 1.964189000  |
| 1 | -3.751741000 | 1.952385000  | 0.735654000  |
| 1 | -2.947432000 | 0.420910000  | 0.239464000  |
| 6 | -1.605034000 | 3.025971000  | 1.931671000  |
| 1 | -2.273187000 | 3.800512000  | 1.550995000  |
| 1 | -1.927572000 | 2.695567000  | 2.920584000  |
| 1 | -0.580159000 | 3.390685000  | 1.970823000  |
| 6 | 0.727753000  | 2.523546000  | -1.790885000 |
| 1 | 1.794309000  | 2.461344000  | -1.986806000 |
| 6 | -0.124803000 | 2.985558000  | -2.786853000 |
| 1 | 0.274762000  | 3.272726000  | -3.754624000 |
| 6 | -1.989828000 | 2.718953000  | -1.298494000 |
| 1 | -3.054154000 | 2.797998000  | -1.101717000 |
| 6 | -1.491735000 | 3.090686000  | -2.541413000 |
| 1 | -2.167144000 | 3.456944000  | -3.307151000 |
| 1 | 2.452749000  | 2.030401000  | 0.373545000  |
| 1 | 0.982126000  | 1.840214000  | 1.748147000  |
| 1 | -1.019170000 | 1.084632000  | 1.345238000  |
| 1 | 1.390216000  | 0.367361000  | 0.475160000  |
| 6 | 0.529896000  | -0.767108000 | 1.223176000  |
| 8 | -0.686453000 | -0.495386000 | 1.244691000  |
| 1 | 1.160478000  | -0.637685000 | 2.114248000  |
| 1 | 0.916838000  | -1.490055000 | 0.486484000  |

Mes'  
E(RM062X) = -1205.15486266

|   |              |              |              |
|---|--------------|--------------|--------------|
| 7 | -1.648260000 | 1.381204000  | 0.051382000  |
| 6 | -1.109847000 | 2.406700000  | -0.879352000 |
| 6 | 0.275153000  | 2.593651000  | -0.918051000 |
| 5 | 1.401860000  | 1.888446000  | 0.033507000  |
| 6 | 2.668973000  | 1.404590000  | -0.849431000 |
| 6 | 2.538657000  | 0.225785000  | -1.599746000 |
| 6 | 3.884601000  | 2.106386000  | -0.971261000 |
| 6 | 3.536868000  | -0.287719000 | -2.423891000 |
| 6 | 4.889650000  | 1.596014000  | -1.800022000 |
| 6 | 4.747995000  | 0.414099000  | -2.521484000 |
| 6 | 1.760678000  | 2.569853000  | 1.463707000  |
| 6 | 2.572562000  | 1.772164000  | 2.291844000  |
| 6 | 1.376063000  | 3.823119000  | 1.983299000  |
| 6 | 2.999402000  | 2.138786000  | 3.564491000  |
| 6 | 1.798450000  | 4.193992000  | 3.266475000  |
| 6 | 2.595782000  | 3.385085000  | 4.069215000  |
| 6 | 4.153475000  | 3.405733000  | -0.243906000 |
| 1 | 4.992995000  | 3.934602000  | -0.703482000 |
| 1 | 3.283689000  | 4.069667000  | -0.257128000 |
| 1 | 4.392742000  | 3.235746000  | 0.810956000  |
| 6 | 5.863859000  | -0.095161000 | -3.396267000 |
| 1 | 6.194294000  | -1.092408000 | -3.084687000 |
| 1 | 5.547955000  | -0.179247000 | -4.442207000 |
| 1 | 6.727800000  | 0.572067000  | -3.358390000 |
| 6 | 0.563531000  | 4.832772000  | 1.201313000  |
| 1 | -0.405503000 | 4.442761000  | 0.873786000  |
| 1 | 0.378385000  | 5.722625000  | 1.808396000  |
| 1 | 1.085892000  | 5.150045000  | 0.293286000  |

Mes  
E(RM062X) = -1205.14465089

|   |              |              |              |
|---|--------------|--------------|--------------|
| 7 | -1.604437000 | 1.338153000  | 0.225233000  |
| 6 | -1.105154000 | 2.361189000  | -0.726003000 |
| 6 | 0.276048000  | 2.544848000  | -0.848421000 |
| 5 | 1.496679000  | 1.838034000  | -0.005465000 |
| 6 | 2.714660000  | 1.495954000  | -1.026172000 |
| 6 | 2.542489000  | 0.490347000  | -2.010673000 |
| 6 | 3.957020000  | 2.169875000  | -1.007458000 |
| 6 | 3.601546000  | 0.111466000  | -2.836360000 |
| 6 | 4.993846000  | 1.772068000  | -1.858205000 |
| 6 | 4.849811000  | 0.723967000  | -2.759595000 |
| 6 | 1.872414000  | 2.452395000  | 1.465978000  |
| 6 | 2.727350000  | 1.690192000  | 2.305581000  |
| 6 | 1.386468000  | 3.669887000  | 2.013013000  |
| 6 | 2.990681000  | 2.079240000  | 3.621306000  |
| 6 | 1.674857000  | 4.029484000  | 3.333554000  |
| 6 | 2.457614000  | 3.239783000  | 4.168450000  |
| 6 | 4.227718000  | 3.372596000  | -0.125646000 |
| 1 | 4.461285000  | 3.095871000  | 0.907235000  |
| 1 | 5.075720000  | 3.938333000  | -0.520950000 |
| 1 | 3.366223000  | 4.044358000  | -0.078364000 |
| 6 | 5.995016000  | 0.272687000  | -3.629052000 |
| 1 | 6.716934000  | 1.078693000  | -3.783290000 |
| 1 | 6.530401000  | -0.565615000 | -3.170267000 |
| 1 | 5.642075000  | -0.062143000 | -4.608238000 |
| 6 | 0.597603000  | 4.692210000  | 1.217692000  |
| 1 | -0.388587000 | 4.339537000  | 0.901341000  |

|   |              |              |              |   |              |              |              |
|---|--------------|--------------|--------------|---|--------------|--------------|--------------|
| 1 | 0.448821000  | 5.592757000  | 1.818372000  | 6 | -3.156826000 | 2.751015000  | 0.845496000  |
| 1 | 1.125189000  | 4.984680000  | 0.305997000  | 1 | -3.394049000 | 2.266680000  | 1.795783000  |
| 6 | 2.716357000  | 3.626037000  | 5.601525000  | 1 | -2.825058000 | 3.768988000  | 1.024904000  |
| 1 | 1.972544000  | 3.180019000  | 6.270699000  | 1 | -4.046434000 | 2.751406000  | 0.212326000  |
| 1 | 3.700393000  | 3.283738000  | 5.932091000  | 6 | 0.677884000  | 3.370914000  | -1.943819000 |
| 1 | 2.669376000  | 4.709948000  | 5.734036000  | 1 | 1.750045000  | 3.377014000  | -2.081452000 |
| 6 | -2.905866000 | 0.712826000  | -0.128001000 | 6 | -0.070451000 | 4.096039000  | -2.860118000 |
| 1 | -2.987821000 | -0.195760000 | 0.468621000  | 1 | 0.433141000  | 4.629974000  | -3.659218000 |
| 1 | -3.727080000 | 1.392624000  | 0.099238000  | 6 | -2.041324000 | 3.416898000  | -1.717491000 |
| 1 | -2.897196000 | 0.463425000  | -1.188337000 | 1 | -3.123140000 | 3.410759000  | -1.626619000 |
| 6 | -1.619342000 | 1.822485000  | 1.635075000  | 6 | -1.453376000 | 4.125205000  | -2.751992000 |
| 1 | -2.335884000 | 2.642143000  | 1.715254000  | 1 | -2.065131000 | 4.675399000  | -3.458567000 |
| 1 | -1.907100000 | 0.983601000  | 2.270472000  | 1 | 5.678901000  | 2.154206000  | -1.955614000 |
| 1 | -0.617130000 | 2.164863000  | 1.898021000  | 1 | 1.783424000  | 4.882057000  | 3.865321000  |
| 6 | 0.650008000  | 3.498128000  | -1.814288000 | 8 | -0.783225000 | 1.038234000  | 2.113788000  |
| 1 | 1.712278000  | 3.644514000  | -1.992952000 | 6 | -0.106852000 | 0.143351000  | 1.513158000  |
| 6 | -0.266099000 | 4.253514000  | -2.535379000 | 1 | 0.670524000  | 0.723642000  | 0.451410000  |
| 1 | 0.083312000  | 4.982198000  | -3.259974000 | 1 | -1.422454000 | 1.608845000  | 1.143664000  |
| 6 | -2.052956000 | 3.109286000  | -1.422298000 | 1 | 0.746738000  | -0.300311000 | 2.031933000  |
| 1 | -3.115069000 | 2.944369000  | -1.277629000 | 1 | 3.313623000  | -1.206001000 | -3.095625000 |
| 6 | -1.630191000 | 4.072982000  | -2.328568000 | 6 | 1.141245000  | -0.668287000 | -1.776575000 |
| 1 | -2.360696000 | 4.656688000  | -2.878064000 | 6 | 3.436606000  | 0.246273000  | 1.770305000  |
| 1 | 5.941042000  | 2.307743000  | -1.817851000 | 1 | 4.122357000  | 1.331526000  | 3.929284000  |
| 1 | 1.283002000  | 4.969980000  | 3.716919000  | 9 | 6.891427000  | 0.522058000  | -3.235038000 |
| 8 | -0.536943000 | -0.939977000 | 0.757329000  | 9 | 5.438033000  | 0.046035000  | -4.761363000 |
| 6 | 0.650317000  | -0.677234000 | 1.063033000  | 9 | 5.938314000  | -1.422429000 | -3.268685000 |
| 1 | 1.059281000  | 0.645702000  | 0.355471000  | 9 | 0.025868000  | 0.068875000  | -1.928649000 |
| 1 | -0.966661000 | 0.497104000  | 0.249566000  | 9 | 0.965715000  | -1.408950000 | -0.666949000 |
| 1 | 0.904296000  | -0.229082000 | 2.040539000  | 9 | 1.157050000  | -1.534096000 | -2.799933000 |
| 1 | 3.442364000  | -0.673706000 | -3.573799000 | 9 | 4.599052000  | 3.205169000  | 0.793313000  |
| 6 | 1.197473000  | -0.151880000 | -2.284331000 | 9 | 2.947554000  | 4.145374000  | -0.238811000 |
| 1 | 0.518834000  | 0.578791000  | -2.740177000 | 9 | 4.891652000  | 4.087844000  | -1.142570000 |
| 1 | 1.307034000  | -0.981197000 | -2.987676000 | 9 | 0.654339000  | 4.974478000  | 0.485701000  |
| 1 | 0.692210000  | -0.537188000 | -1.396131000 | 9 | 0.261957000  | 5.539371000  | 2.509646000  |
| 6 | 3.499873000  | 0.476928000  | 1.825148000  | 9 | -0.763278000 | 3.850945000  | 1.676685000  |
| 1 | 4.514174000  | 0.777958000  | 1.535922000  | 9 | 2.664181000  | -0.526194000 | 0.994067000  |
| 1 | 3.594836000  | -0.263327000 | 2.625496000  | 9 | 3.754408000  | -0.525946000 | 2.826368000  |
| 1 | 3.075870000  | 0.000727000  | 0.945551000  | 9 | 4.579627000  | 0.460195000  | 1.102245000  |
| 1 | 3.647378000  | 1.458491000  | 4.229506000  | 9 | 4.705837000  | 4.498007000  | 5.012891000  |
| 1 | 1.476563000  | -1.223127000 | 0.578606000  | 9 | 2.843949000  | 4.281514000  | 6.074914000  |
|   |              |              |              | 9 | 4.234634000  | 2.624002000  | 5.973822000  |
|   |              |              |              | 1 | -0.591921000 | -0.529338000 | 0.791596000  |

### FMes

E(RM062X) = -2991.59788324

|   |              |              |              |
|---|--------------|--------------|--------------|
| 7 | -2.058873000 | 1.970327000  | 0.211979000  |
| 6 | -1.269243000 | 2.708578000  | -0.794639000 |
| 6 | 0.139578000  | 2.654507000  | -0.853139000 |
| 5 | 1.265869000  | 1.845281000  | 0.062101000  |
| 6 | 2.490572000  | 1.351912000  | -0.942144000 |
| 6 | 2.391407000  | 0.181476000  | -1.738102000 |
| 6 | 3.708511000  | 2.051797000  | -1.091935000 |
| 6 | 3.432877000  | -0.292755000 | -2.524793000 |
| 6 | 4.759742000  | 1.585386000  | -1.886131000 |
| 6 | 4.631569000  | 0.402902000  | -2.583970000 |
| 6 | 1.854997000  | 2.342070000  | 1.536390000  |
| 6 | 2.810089000  | 1.555403000  | 2.236294000  |
| 6 | 1.507703000  | 3.544067000  | 2.206421000  |
| 6 | 3.390893000  | 1.963017000  | 3.440889000  |
| 6 | 2.087029000  | 3.952090000  | 3.402653000  |
| 6 | 3.044456000  | 3.165407000  | 4.017574000  |
| 6 | 4.025397000  | 3.368759000  | -0.406792000 |
| 6 | 5.734961000  | -0.111595000 | -3.462406000 |
| 6 | 0.431152000  | 4.478733000  | 1.702332000  |
| 6 | 3.709840000  | 3.640321000  | 5.276843000  |
| 6 | -2.632000000 | 0.725679000  | -0.364312000 |
| 1 | -3.061178000 | 0.135776000  | 0.449916000  |
| 1 | -3.411273000 | 0.979933000  | -1.087802000 |
| 1 | -1.847873000 | 0.166145000  | -0.867885000 |

### CF<sub>3</sub>

E(RM062X) = -1181.39197276

|   |              |              |              |
|---|--------------|--------------|--------------|
| 7 | -1.693634000 | 1.692376000  | 0.917036000  |
| 6 | -1.096903000 | 2.386528000  | -0.240930000 |
| 6 | 0.271501000  | 2.284493000  | -0.518646000 |
| 5 | 1.366170000  | 1.620282000  | 0.440630000  |
| 6 | -2.567643000 | 0.574038000  | 0.480108000  |
| 1 | -2.870066000 | 0.014302000  | 1.366749000  |
| 1 | -3.443187000 | 0.954798000  | -0.049696000 |
| 1 | -1.992159000 | -0.071493000 | -0.184830000 |
| 6 | -2.417951000 | 2.605701000  | 1.837772000  |
| 1 | -3.350651000 | 2.949421000  | 1.385743000  |
| 1 | -2.632523000 | 2.050481000  | 2.753190000  |
| 1 | -1.768575000 | 3.448001000  | 2.064347000  |
| 6 | 0.712650000  | 2.928680000  | -1.687952000 |
| 1 | 1.765814000  | 2.881046000  | -1.942358000 |
| 6 | -0.146926000 | 3.638713000  | -2.517394000 |
| 1 | 0.239670000  | 4.124074000  | -3.407373000 |
| 6 | -1.973548000 | 3.094132000  | -1.061748000 |
| 1 | -3.030854000 | 3.148044000  | -0.818918000 |
| 6 | -1.498764000 | 3.727220000  | -2.202728000 |
| 1 | -2.182410000 | 4.276717000  | -2.840874000 |
| 1 | -0.978187000 | 1.111962000  | 1.643179000  |
| 1 | 0.937040000  | 0.437539000  | 0.801523000  |

|   |              |              |              |
|---|--------------|--------------|--------------|
| 6 | 0.495992000  | -0.338313000 | 1.845566000  |
| 8 | -0.415961000 | 0.280919000  | 2.496556000  |
| 1 | 1.475824000  | -0.483921000 | 2.315173000  |
| 6 | 1.607048000  | 2.466851000  | 1.796052000  |
| 9 | 2.367464000  | 3.553217000  | 1.545838000  |
| 9 | 0.452631000  | 2.944552000  | 2.339827000  |
| 9 | 2.225838000  | 1.784551000  | 2.780166000  |
| 6 | 2.756282000  | 1.176993000  | -0.244630000 |
| 9 | 3.538973000  | 2.217400000  | -0.613994000 |
| 9 | 3.505416000  | 0.416988000  | 0.586861000  |
| 9 | 2.567310000  | 0.437485000  | -1.363411000 |
| 1 | 0.216370000  | -1.142216000 | 1.141438000  |

### PFtB

E(RM062X) = -2608.13979769

|   |              |              |              |
|---|--------------|--------------|--------------|
| 7 | -1.159911000 | 0.367017000  | -0.244820000 |
| 6 | -0.998205000 | 1.809507000  | -0.496023000 |
| 6 | 0.088942000  | 2.588106000  | -0.035173000 |
| 5 | 1.559777000  | 2.171161000  | 0.602137000  |
| 6 | 2.846955000  | 2.422962000  | -0.587626000 |
| 6 | 2.239829000  | 2.026542000  | -1.962858000 |
| 6 | 4.103675000  | 1.519366000  | -0.403721000 |
| 6 | 1.691509000  | 2.568502000  | 2.270133000  |
| 6 | 3.026248000  | 2.207959000  | 2.956811000  |
| 6 | 0.616758000  | 1.787058000  | 3.078571000  |
| 6 | 3.414128000  | 3.858659000  | -0.757084000 |
| 9 | 4.187489000  | 4.191781000  | 0.274793000  |
| 9 | 4.163358000  | 3.952944000  | -1.866107000 |
| 9 | 2.472275000  | 4.793930000  | -0.881448000 |
| 6 | 1.453313000  | 4.065799000  | 2.562125000  |
| 9 | 1.863064000  | 4.431463000  | 3.779491000  |
| 9 | 2.116583000  | 4.839895000  | 1.692430000  |
| 9 | 0.153263000  | 4.368912000  | 2.479540000  |
| 9 | 4.755147000  | 1.763582000  | 0.724494000  |
| 9 | 5.008241000  | 1.653952000  | -1.376996000 |
| 9 | 3.747182000  | 0.219628000  | -0.400477000 |
| 9 | 3.140388000  | 1.794411000  | -2.918473000 |
| 9 | 1.418146000  | 2.960172000  | -2.436011000 |
| 9 | 1.534136000  | 0.878023000  | -1.846530000 |
| 9 | 3.971029000  | 3.098174000  | 2.656971000  |
| 9 | 3.448282000  | 0.985668000  | 2.602060000  |
| 9 | 2.918736000  | 2.185981000  | 4.291836000  |
| 9 | -0.525868000 | 1.623874000  | 2.400522000  |
| 9 | 0.298516000  | 2.404764000  | 4.220549000  |
| 9 | 1.062024000  | 0.569996000  | 3.404814000  |
| 1 | -0.320818000 | -0.278857000 | 0.583631000  |
| 1 | 1.656724000  | 0.843235000  | 0.714394000  |
| 6 | -2.068557000 | 2.377431000  | -1.193935000 |
| 1 | -2.862778000 | 1.731750000  | -1.555872000 |
| 6 | -2.156789000 | 3.740105000  | -1.420051000 |
| 1 | -2.996081000 | 4.154587000  | -1.968014000 |
| 6 | -0.084850000 | 3.973147000  | -0.236680000 |
| 1 | 0.665392000  | 4.652505000  | 0.127779000  |
| 6 | -1.159120000 | 4.548824000  | -0.899515000 |
| 1 | -1.199094000 | 5.626869000  | -1.013489000 |
| 6 | 1.528764000  | -0.534533000 | 0.814821000  |
| 8 | 0.364643000  | -0.817424000 | 1.285026000  |
| 6 | -2.385023000 | 0.091485000  | 0.546546000  |
| 1 | -3.291685000 | 0.268228000  | -0.038703000 |
| 1 | -2.359568000 | -0.956694000 | 0.857525000  |
| 1 | -2.387412000 | 0.727430000  | 1.429768000  |
| 6 | -1.176406000 | -0.449138000 | -1.477630000 |
| 1 | -0.330539000 | -0.180441000 | -2.105474000 |
| 1 | -1.103909000 | -1.502665000 | -1.191520000 |
| 1 | -2.103514000 | -0.301741000 | -2.041570000 |
| 1 | 1.711007000  | -0.668151000 | -0.254392000 |
| 1 | 2.384798000  | -0.694380000 | 1.470599000  |

### C<sub>6</sub>F<sub>5</sub>

E(RM062X) = -1961.68202993

|   |              |              |              |
|---|--------------|--------------|--------------|
| 7 | -1.501602000 | 1.775881000  | 0.821038000  |
| 6 | -1.107145000 | 2.367765000  | -0.481126000 |
| 6 | 0.199988000  | 2.229263000  | -0.972349000 |
| 5 | 1.448262000  | 1.518241000  | -0.213913000 |
| 6 | 2.794993000  | 1.372298000  | -1.092490000 |
| 6 | 3.205111000  | 0.173597000  | -1.661591000 |
| 6 | 3.651318000  | 2.452184000  | -1.280835000 |
| 6 | 4.392022000  | 0.038240000  | -2.372227000 |
| 6 | 4.843126000  | 2.365410000  | -1.987277000 |
| 6 | 5.215217000  | 1.143542000  | -2.533535000 |
| 6 | 1.782744000  | 2.059630000  | 1.271354000  |
| 6 | 2.429794000  | 1.236680000  | 2.192315000  |
| 6 | 1.535392000  | 3.352313000  | 1.716966000  |
| 6 | 2.766167000  | 1.637580000  | 3.477298000  |
| 6 | 1.845599000  | 3.797178000  | 2.996505000  |
| 6 | 2.468988000  | 2.931980000  | 3.882670000  |
| 6 | -2.680214000 | 0.870057000  | 0.713220000  |
| 1 | -2.772328000 | 0.332383000  | 1.657247000  |
| 1 | -3.583823000 | 1.444640000  | 0.510886000  |
| 1 | -2.501064000 | 0.164957000  | -0.097884000 |
| 6 | -1.735405000 | 2.808807000  | 1.869662000  |
| 1 | -1.744735000 | 2.313326000  | 2.842225000  |
| 1 | -0.939215000 | 3.546821000  | 1.819033000  |
| 1 | -2.695275000 | 3.295851000  | 1.686585000  |
| 6 | 0.417536000  | 2.822988000  | -2.227494000 |
| 1 | 1.404416000  | 2.739020000  | -2.670228000 |
| 6 | -0.563778000 | 3.516862000  | -2.925662000 |
| 1 | -0.331462000 | 3.956818000  | -3.889945000 |
| 6 | -2.104753000 | 3.073065000  | -1.150358000 |
| 1 | -3.095516000 | 3.173136000  | -0.716672000 |
| 6 | -1.835453000 | 3.654225000  | -2.381962000 |
| 1 | -2.611587000 | 4.200656000  | -2.906492000 |
| 8 | -0.143101000 | -0.178334000 | 1.750151000  |
| 6 | 0.310468000  | -0.691452000 | 0.693330000  |
| 1 | 1.134556000  | 0.292007000  | -0.021820000 |
| 1 | -0.760307000 | 1.069987000  | 1.221943000  |
| 1 | 1.137013000  | -1.410773000 | 0.739806000  |
| 9 | 4.744585000  | -1.134030000 | -2.898815000 |
| 9 | 6.352887000  | 1.035854000  | -3.214642000 |
| 9 | 5.627599000  | 3.430160000  | -2.148045000 |
| 9 | 3.315724000  | 3.650629000  | -0.780868000 |
| 9 | 2.446048000  | -0.928674000 | -1.540674000 |
| 9 | 2.766826000  | -0.011662000 | 1.845780000  |
| 9 | 0.930064000  | 4.245798000  | 0.913955000  |
| 9 | 1.547397000  | 5.041495000  | 3.373989000  |
| 9 | 2.778209000  | 3.337600000  | 5.110836000  |
| 9 | 3.375579000  | 0.804068000  | 4.318338000  |
| 1 | -0.327387000 | -0.788993000 | -0.205321000 |

## 8. Substrates

### H<sub>2</sub>

E(RM062X) = -1.16799951607

|   |              |              |              |
|---|--------------|--------------|--------------|
| 1 | -0.493945000 | -0.039990000 | -0.199304000 |
| 1 | -0.841935000 | 0.039990000  | -0.844352000 |

### CO<sub>2</sub>

E(RM062X) = -188.575018237

|   |              |              |              |
|---|--------------|--------------|--------------|
| 6 | -0.667940000 | 0.000000000  | -0.521828000 |
| 8 | -0.119089000 | -0.126145000 | 0.495542000  |
| 8 | -1.216791000 | 0.126145000  | -1.539198000 |

### HCOOH (cis)

E(RM062X) = -189.747609439

|   |              |              |              |
|---|--------------|--------------|--------------|
| 1 | -2.206003000 | 1.596537000  | -2.587893000 |
| 8 | -2.220377000 | 0.647685000  | -2.762584000 |
| 8 | -2.261354000 | -1.227016000 | -1.562310000 |
| 6 | -2.242418000 | -0.035246000 | -1.604496000 |
| 1 | -2.241376000 | 0.609967000  | -0.706594000 |

#### HCOOH (trans)

E(RM062X) = -189.753310212

|   |              |              |              |
|---|--------------|--------------|--------------|
| 1 | -2.247340000 | -0.002391000 | -3.489419000 |
| 8 | -2.247340000 | 0.646784000  | -2.768016000 |
| 8 | -2.247340000 | -1.242536000 | -1.545859000 |
| 6 | -2.247340000 | -0.046002000 | -1.622018000 |
| 1 | -2.247340000 | 0.644145000  | -0.767731000 |

#### CH<sub>2</sub>(OH)<sub>2</sub>

E(RM062X) = -190.941235443

|   |              |              |              |
|---|--------------|--------------|--------------|
| 8 | -1.449236000 | 1.159035000  | -0.717566000 |
| 6 | -1.296536000 | -0.087962000 | -0.103906000 |
| 1 | -0.389369000 | -0.605658000 | -0.436568000 |
| 1 | -1.220102000 | 0.124185000  | 0.968813000  |
| 1 | -1.481403000 | 1.007209000  | -1.669899000 |
| 8 | -2.348492000 | -0.961445000 | -0.396554000 |
| 1 | -3.160309000 | -0.548581000 | -0.077919000 |

#### CH<sub>2</sub>O

E(RM062X) = -114.489434265

|   |              |              |              |
|---|--------------|--------------|--------------|
| 8 | -1.245434000 | -0.000006000 | -2.579812000 |
| 6 | -1.245430000 | -0.000001000 | -1.378331000 |
| 1 | -1.245428000 | 0.937884000  | -0.790103000 |
| 1 | -1.245428000 | -0.937877000 | -0.790090000 |

#### H<sub>2</sub>O

E(RM062X) = -76.4252795782

|   |             |             |              |
|---|-------------|-------------|--------------|
| 8 | 0.310597000 | 1.642578000 | -0.417528000 |
| 1 | 0.310597000 | 2.402838000 | 0.171539000  |
| 1 | 0.310597000 | 0.882319000 | 0.171539000  |

#### CH<sub>3</sub>OH

E(RM062X) = -115.707294519

|   |              |              |              |
|---|--------------|--------------|--------------|
| 6 | -1.370669000 | -0.000387000 | -0.682198000 |
| 1 | -1.370669000 | -0.835276000 | -1.384989000 |
| 1 | -2.261599000 | 0.610038000  | -0.879695000 |
| 1 | -0.479738000 | 0.610038000  | -0.879695000 |
| 8 | -1.370669000 | -0.554016000 | 0.615331000  |
| 1 | -1.370669000 | 0.169604000  | 1.249173000  |
